# Supplementary material for: Discovery of IRAK4 Inhibitors BAY1834845 (Zabedosertib) and BAY1830839
Source: PubMed Central journal article supplement (PMC10823478; doi:10.1021/acs.jmedchem.3c01714), 2024-01-17
Supplement: jm3c01714_si_002.pdf [file jm3c01714_si_002.pdf]

## Supporting Information

Discovery of IRAK4 Inhibitors BAY1834845 (zabedoseritib) and BAY1830839

Ulrich Bothe<sup>a\*</sup>, Judith Günther<sup>a</sup>, Reinhard Nubbemeyer<sup>a#</sup>, Holger Siebeneicher<sup>a</sup>, Sven Ring<sup>a</sup>, Ulf Bömer<sup>a#</sup>, Michaele Peters<sup>a</sup>, Alexandra Rausch<sup>a#</sup>, Karsten Denner<sup>a</sup>, Herbert Himmel<sup>a</sup>, Andreas Sutter<sup>a</sup>, Ildiko Terebesi<sup>a</sup>, Martin Lange<sup>a#</sup>, Antje M. Wengner<sup>a</sup>, Nicolas Guimond<sup>a</sup>, Tobias Thaler<sup>a</sup>, Johannes Platzek<sup>a</sup>, Uwe Eberspächer<sup>a</sup>, Martina Schäfer<sup>a#</sup>, Holger Steuber<sup>a#</sup>, Thomas M. Zollner<sup>a</sup>, Andreas Steinmeyer<sup>a</sup>, and Nicole Schmidt<sup>a</sup>

<sup>a</sup>Bayer AG, Research & Development, Pharmaceuticals, 13353 Berlin, Germany

Corresponding author:

\*Email: [Ulrich.bothe@bayer.com](mailto:Ulrich.bothe@bayer.com)

Present addresses

#R.N., U.Bö., A.R., M.L., M.S., H.St.: Nuvisan ICB GmbH, 13353 Berlin, Germany.

## Contents

|                                                                                  |    |
|----------------------------------------------------------------------------------|----|
| Drug metabolism and pharmacokinetics (DMPK) .....                                | 10 |
| Caco-2 cell permeability assay .....                                             | 10 |
| <i>In vitro</i> metabolic stability in rat hepatocytes .....                     | 10 |
| <i>In vitro</i> metabolic stability in human, dog, and primate hepatocytes ..... | 11 |
| Inhibition of CYP450 metabolism .....                                            | 12 |
| CYP induction .....                                                              | 12 |
| <i>In vivo</i> studies general information .....                                 | 12 |
| Pharmacokinetics in rats .....                                                   | 12 |
| Pharmacokinetics in mice .....                                                   | 13 |
| Pharmacokinetics in beagle dogs .....                                            | 13 |
| <i>In vitro</i> pharmacology .....                                               | 14 |
| Kinase assays .....                                                              | 14 |
| Table S1. Summary of kinase assays. ....                                         | 15 |
| DiscoverX KINOMEScan™ data .....                                                 | 17 |
| Table S2. Matrix of compound screen for BAY1830839. ....                         | 18 |
| Table S3. Matrix of Compound Screen for BAY1834845. ....                         | 23 |
| Table S4. Matrix of compound screen for compound 5 .....                         | 28 |
| Murine cellular potency .....                                                    | 31 |
| <i>In vivo</i> pharmacology .....                                                | 32 |
| IL-1-beta induced systemic inflammation in mice .....                            | 32 |
| Figure S1 .....                                                                  | 32 |
| LPS (Lipopolysaccharides) induced systemic inflammation in mice .....            | 33 |
| Figure S2: .....                                                                 | 33 |
| Imiquimod-induced topical inflammation in mice .....                             | 33 |
| Table S5. Disease scoring method for assessing back skin in mice. ....           | 34 |
| X-ray crystallography .....                                                      | 34 |
| Expression and purification of IRAK4 for X-ray crystallography .....             | 34 |
| Crystallization and complex formation .....                                      | 35 |
| Data collection and refinement for IRAK4 co-complex structures: .....            | 35 |

|                                                           |    |
|-----------------------------------------------------------|----|
| Table S6. Data collection and refinement statistics ..... | 37 |
| Figure S3: .....                                          | 38 |
| Computational studies .....                               | 39 |
| Figure S4: .....                                          | 39 |
| Experimental section: synthetic chemistry .....           | 40 |
| General Methods and Materials .....                       | 40 |
| Abbreviations .....                                       | 41 |
| Synthesis of compound 6 .....                             | 42 |
| Intermediate 6-a .....                                    | 42 |
| Intermediate 6-b .....                                    | 42 |
| Intermediate 6-c .....                                    | 42 |
| Intermediate 6-d .....                                    | 43 |
| Intermediate 6-e .....                                    | 43 |
| Compound 6 (step 6-f) .....                               | 44 |
| Synthesis of compound 7 .....                             | 44 |
| Intermediate 7-a .....                                    | 44 |
| Intermediate 7-b .....                                    | 45 |
| Intermediate 7-c .....                                    | 46 |
| Intermediate 7-d .....                                    | 46 |
| Intermediate 7-e .....                                    | 47 |
| Compound 7 (step 7-f) .....                               | 47 |
| Synthesis of compound 8 .....                             | 48 |
| Intermediate 8-a .....                                    | 48 |
| Intermediate 8-b .....                                    | 48 |
| Intermediate 8-c .....                                    | 49 |
| Intermediate 8-d .....                                    | 49 |
| Intermediate 8-e .....                                    | 50 |
| Compound 8 (step 8-f) .....                               | 50 |
| Synthesis of compound 9 .....                             | 51 |

|                               |    |
|-------------------------------|----|
| Intermediate 9-a.....         | 51 |
| Intermediate 9-b.....         | 51 |
| Intermediate 9-c.....         | 52 |
| Intermediate 9-d.....         | 53 |
| Intermediate 9-e.....         | 53 |
| Compound 9 (step 9-f).....    | 54 |
| Synthesis of compound 10..... | 54 |
| Intermediate 10-a.....        | 54 |
| Intermediate 10-b.....        | 55 |
| Intermediate 10-c.....        | 56 |
| Compound 10 (step 10-d).....  | 56 |
| Synthesis of compound 11..... | 57 |
| Intermediate 11-a.....        | 57 |
| Intermediate 11-b.....        | 58 |
| Intermediate 11-c.....        | 58 |
| Intermediate 11-d.....        | 59 |
| Intermediate 11-e.....        | 59 |
| Intermediate 11-f.....        | 60 |
| Compound 11 (step 11-g).....  | 60 |
| Synthesis of compound 12..... | 61 |
| Compound 12 (step 12-a).....  | 61 |
| Synthesis of compound 13..... | 62 |
| Intermediate 13-a.....        | 62 |
| Intermediate 13-b.....        | 62 |
| Intermediate 13-c.....        | 63 |
| Intermediate 13-d.....        | 63 |
| Intermediate 13-e.....        | 64 |
| Intermediate 13-f.....        | 64 |
| Intermediate 13-g.....        | 64 |

|                               |    |
|-------------------------------|----|
| Compound 13 (step 13-h).....  | 65 |
| Synthesis of compound 14..... | 66 |
| Intermediate 14-a.....        | 66 |
| Intermediate 14-b.....        | 66 |
| Intermediate 14-c.....        | 67 |
| Intermediate 14-d.....        | 68 |
| Synthesis of compound 15..... | 68 |
| Intermediate 15-a.....        | 68 |
| Intermediate 15-b.....        | 69 |
| Intermediate 15-c.....        | 69 |
| Intermediate 15-d.....        | 70 |
| Intermediate 15-e.....        | 71 |
| Intermediate 15-f.....        | 71 |
| Intermediate 15-g.....        | 72 |
| Compound 15 (step 15-h).....  | 72 |
| Synthesis of compound 16..... | 73 |
| Compound 16 (step 16-a).....  | 73 |
| Synthesis of compound 17..... | 73 |
| Compound 17 (step 17-a).....  | 73 |
| Synthesis of compound 18..... | 74 |
| Intermediate 18-a.....        | 74 |
| Intermediate 18-b.....        | 74 |
| Intermediate 18-c.....        | 75 |
| Intermediate 18-d.....        | 76 |
| Intermediate 18-e.....        | 76 |
| Intermediate 18-f.....        | 77 |
| Intermediate 18-g.....        | 78 |
| Intermediate 18-h.....        | 78 |
| Intermediate 18-i.....        | 79 |

|                                                       |    |
|-------------------------------------------------------|----|
| Compound 18 (step 18-j) .....                         | 79 |
| Synthesis of compound 19 .....                        | 80 |
| Compound 19 (step 19-a) .....                         | 80 |
| Synthesis of compound 20 .....                        | 81 |
| Compound 20 (step 20-a) .....                         | 81 |
| Synthesis of compound 21 .....                        | 81 |
| Intermediate 21-a .....                               | 81 |
| Intermediate 21-b .....                               | 82 |
| Intermediate 21-c .....                               | 83 |
| Compound 21 (step 21-d) .....                         | 83 |
| Synthesis of compound 22 .....                        | 84 |
| Intermediate 22-a .....                               | 84 |
| Intermediate 22-b .....                               | 84 |
| Intermediate 22-c .....                               | 85 |
| Compound 22 (step 22-d) .....                         | 85 |
| Synthesis of compound 23 and compound 24 .....        | 86 |
| Intermediate 23-a .....                               | 86 |
| Intermediate 23-b .....                               | 86 |
| Intermediate 23-c .....                               | 87 |
| Intermediate 23-d .....                               | 87 |
| Intermediate 23-e .....                               | 88 |
| Table S7. HPLC methodology .....                      | 89 |
| Compound 23 and Compound 24 (step 23/24-f) .....      | 89 |
| Table S8. Chiral HPLC methodology .....               | 90 |
| Table S9. Chiral HPLC methodology (Preparation) ..... | 91 |
| Synthesis of compound 25 .....                        | 91 |
| Compound 25 (step 25-a) .....                         | 91 |
| Synthesis of compound 26 .....                        | 92 |
| Intermediate 26-a .....                               | 92 |

|                               |     |
|-------------------------------|-----|
| Intermediate 26-b.....        | 93  |
| Compound 26 (step 26-c).....  | 93  |
| Synthesis of compound 27..... | 94  |
| Compound 27 (step 27-a).....  | 94  |
| Synthesis of compound 28..... | 95  |
| Compound 28 (step 28-a).....  | 95  |
| Synthesis of compound 29..... | 95  |
| Intermediate 29-a.....        | 95  |
| Intermediate 29-b.....        | 96  |
| Intermediate 29-c.....        | 97  |
| Compound 29 (step 29-d).....  | 97  |
| Synthesis of compound 30..... | 98  |
| Compound 30 (step 30-a).....  | 98  |
| Synthesis of compound 31..... | 98  |
| Compound 31 (step 31-a).....  | 98  |
| Synthesis of compound 32..... | 99  |
| Intermediate 32-a.....        | 99  |
| Intermediate 32-b.....        | 100 |
| Intermediate 32-c.....        | 100 |
| Compound 32 (step 32-d).....  | 101 |
| Synthesis of compound 33..... | 101 |
| Intermediate 33-a.....        | 101 |
| Compound 33 (step 33-b).....  | 102 |
| Synthesis of compound 34..... | 103 |
| Compound 34 (step 34-a).....  | 103 |
| Synthesis of compound 35..... | 104 |
| Intermediate 35-a.....        | 104 |
| Intermediate 35-b.....        | 104 |
| Intermediate 35-c.....        | 104 |

|                               |     |
|-------------------------------|-----|
| Intermediate 35-d.....        | 105 |
| Intermediate 35-e.....        | 106 |
| Intermediate 35-f.....        | 106 |
| Compound 35 (step 35-g).....  | 107 |
| Synthesis of compound 36..... | 108 |
| Intermediate 36-a.....        | 108 |
| Intermediate 36-b.....        | 109 |
| Intermediate 36-c.....        | 109 |
| Intermediate 36-d.....        | 110 |
| Intermediate 36-e.....        | 110 |
| Intermediate 36-f.....        | 111 |
| Intermediate 36-g.....        | 112 |
| Compound 36 (step 36-h).....  | 112 |
| Synthesis of compound 37..... | 113 |
| Intermediate 37-a.....        | 113 |
| Intermediate 37-b.....        | 114 |
| Intermediate 37-c.....        | 114 |
| Intermediate 37-d.....        | 115 |
| Intermediate 37-e.....        | 115 |
| Compound 37 (step 37-f).....  | 116 |
| Synthesis of compound 38..... | 116 |
| Intermediate 38-a.....        | 116 |
| Intermediate 38-b.....        | 117 |
| Intermediate 38-c.....        | 117 |
| Intermediate 38-d.....        | 118 |
| Intermediate 38-e.....        | 119 |
| Compound 38 (step 38-f).....  | 119 |
| Synthesis of compound 39..... | 121 |
| Intermediate 39-a.....        | 121 |



|                                                            |     |
|------------------------------------------------------------|-----|
| Intermediate 39-b.....                                     | 121 |
| Intermediate 39-c.....                                     | 122 |
| Intermediate 39-d.....                                     | 122 |
| Intermediate 39-e.....                                     | 123 |
| Compound 39 (step 39-f).....                               | 124 |
| Synthesis of compound 40.....                              | 125 |
| Intermediate 40-a.....                                     | 125 |
| Intermediate 40-b.....                                     | 125 |
| Compound 40 (step 40-c).....                               | 126 |
| Synthesis of compound 41.....                              | 127 |
| Intermediate 41-a.....                                     | 127 |
| Intermediate 41-b.....                                     | 127 |
| Intermediate 41-c.....                                     | 128 |
| Compound 41 (step 41-d).....                               | 128 |
| Figure S5. Original analytical data of test compounds..... | 129 |
| Experimental section: physicochemical assays.....          | 143 |
| Aqueous Solubility of Compound from DMSO solutions.....    | 143 |
| References.....                                            | 143 |

Drug metabolism and pharmacokinetics (DMPK)

### **Caco-2 cell permeability assay**

Caco-2 cells (DSMZ, Braunschweig, Germany) were seeded at a density of  $4.5 \times 10^4$  cells/well on 24-well microtiter plates with a  $0.4 \mu\text{m}$  pore size and grown for 15 d in Dulbecco's Modified Eagle Medium (DMEM) supplemented with 10% FCS (Gibco, Thermo Fisher Scientific, Waltham, MA USA), 1% GlutaMAX (100 ×, Gibco), 100 U/mL penicillin, 100  $\mu\text{g}/\text{mL}$  streptomycin (Gibco), and 1% non-essential amino acids (100 ×). Cells were maintained at 37 °C in a humidified 5% CO<sub>2</sub> atmosphere. Medium was changed every 2–3 d. Before the permeation assay was run, the culture medium was replaced by FCS-free *N*-2-hydroxyethylpiperazine-*N'*-2-ethanesulfonic acid (HEPES) carbonate transport buffer (pH 7.2). The transepithelial electrical resistance was measured to assess monolayer integrity. Test compounds were predissolved in DMSO and added to either the apical or basolateral compartment at a final concentration of 2  $\mu\text{M}$ . Samples were taken from both compartments before and after incubation for 2 h at 37 °C and analyzed by LC-MS/MS after precipitation with MeOH. Permeability ( $P_{\text{app}}$ ) was calculated in the apical to basolateral (A→B) and basolateral to apical (B→A) directions.  $P_{\text{app}}$  was calculated using the equation  $P_{\text{app}} = (V_r/P_0)(1/S)(P_2/t)$ , where  $V_r$  is the volume of medium in the receiver chamber,  $P_0$  is the measured peak area of the test drug in the donor chamber at  $t = 0$ ,  $S$  is the surface area of the monolayer,  $P_2$  is the measured peak area of the test drug in the acceptor chamber after a two-hour incubation, and  $t$  is the incubation time. The efflux ratio (ER) of basolateral (B) to apical (A) was calculated as  $P_{\text{app}} \text{ B} \rightarrow \text{A} / P_{\text{app}} \text{ A} \rightarrow \text{B}$ . Compound recovery was also calculated. As an assay control, reference compounds were analyzed in parallel. Permeability ratings were based on the subsequent ranges: low permeability: < 10 nm/s, moderate permeability: 10–70 nm/s, and high permeability: > 70 nm/s (a-b). ER values < 2.0 were interpreted as no significant efflux.

### ***In vitro* metabolic stability in rat hepatocytes**

Hepatocytes from Han–Wistar rats (Harlan, Laboratories, Horst, The Netherlands) were isolated via a two-intermediate perfusion method. After perfusion, the liver was carefully removed from the rat, the liver capsule was opened, and the hepatocytes were gently shaken out into a Petri dish with ice-cold Williams' medium E (WME, Gibco). The resulting cell suspension was then filtered through sterile gauze into 50 mL Falcon tubes (Corning, US) and centrifuged at  $50 \times g$  for 3 min at rt. The cell pellet was resuspended in 30 mL of WME and centrifuged through a Percoll gradient twice at  $100 \times g$ . The hepatocytes were washed

again with WME and resuspended in medium containing 5% FCS. Cell viability was determined by trypan blue exclusion. For the metabolic stability assay, liver cells were distributed in WME containing 5% FCS and transferred to glass vials at a density of  $1.0 \times 10^6$  vital cells/mL. The test compound was added at a final concentration of 1  $\mu$ M. During incubation, the hepatocyte suspensions were continuously shaken at 580 rpm and aliquots were taken at 2, 8, 16, 30, 45, and 90 min, to which an equal volume of cold MeOH was immediately added. Samples were frozen at  $-20$  °C overnight and subsequently centrifuged for 15 min at 3000 rpm, after which the supernatant was analyzed with an Agilent 1200 HPLC system with LC-MS/MS detection (Agilent Technologies, Inc. Santa Clara, US). The  $t_{1/2}$  of a test compound was determined from the concentration–time plot. The intrinsic clearance was calculated from the  $t_{1/2}$  using the ‘well-stirred’ liver model together with the additional parameters of liver blood flow and number of liver cells *in vivo* and *in vitro*. The hepatic *in vivo* blood clearance (CL) and the maximal oral bioavailability ( $F_{max}$ ) were calculated. The following parameter values were used: liver blood flow 4.2 L/h/kg rat; specific liver weight 32 g/kg rat body weight; liver cells *in vivo*  $1.1 \times 10^8$  cells/g liver; and liver cells *in vitro*  $1.0 \times 10^6$ /mL.

#### ***In vitro* metabolic stability in human, dog, and primate hepatocytes**

Human cryopreserved hepatocytes were purchased from Ka-Ly-Cell (Plobsheim, France, batches EFF, FME, GGJ, XPD) and freshly prepared primate (*cynomolgus macaque*) and dog hepatocytes from Primacyt (Schwerin, Germany). For the metabolic stability assay, liver cells were distributed in WME containing 5% FCS and transferred to glass vials at a density of  $1.0 \times 10^6$  vital cells/mL. The test compound was added at a final concentration of 1  $\mu$ M. During incubation, the hepatocyte suspensions were continuously shaken at 580 rpm and aliquots were taken at 2, 8, 16, 30, 45, and 90 min, to which an equal volume of cold MeOH was immediately added. Samples were frozen at  $-20$  °C overnight and subsequently centrifuged for 15 min at 3000 rpm, after which the supernatant was analyzed with an Agilent 1200 HPLC system with LC-MS/MS detection (Agilent Technologies, Inc., Santa Clara, US). The  $t_{1/2}$  of a test compound was determined from the concentration–time plot. The intrinsic clearance was calculated from the  $t_{1/2}$  using the ‘well-stirred’ liver model together with the additional parameters of liver blood flow and number of liver cells *in vivo* and *in vitro*.  $CL_{blood}$  and  $F_{max}$  were calculated. The following parameter values were used: liver blood flow 4.2/2.6/2.1 L/h/kg (human/primate/dog); specific liver weight 21/30/39 g/kg body weight

(human/primate/dog); liver cells *in vivo*  $1.1 \times 10^8$  cells/g liver (except in the dog  $2.2 \times 10^8$  cells/g liver); liver cells *in vitro*  $1.0 \times 10^6$ /mL.

### **Inhibition of CYP450 metabolism**

The inhibitory potency of test compounds towards CYP450-dependent metabolic pathways was determined in human liver microsomes (purchased from Xenotech, USA) by applying individual CYP isoform selective standard probes (CYP1A2: phenacetin; CYP2C8: amodiaquine; CYP2C9: diclofenac; CYP2D6: dextromethorphan; CYP3A4: midazolam). Reference inhibitors were included as positive controls. Incubation conditions (protein and substrate concentration, incubation time) were optimized according to the linearity of metabolite formation. Assays were processed in 96-well microtiter plates at 37 °C using a Genesis Workstation (Tecan, Crailsheim, Germany). After protein precipitation, metabolite formation was quantified by LC-MS/MS analysis, followed by inhibition evaluation and IC<sub>50</sub> calculation.

### **CYP induction**

To evaluate the CYP induction potential *in vitro*, hepatocytes in sandwich culture from three different liver donors were tested once daily for three consecutive days with vehicle control, eight different concentrations of a test substance, and known positive controls (e.g., omeprazole, phenobarbital, rifampicin). After treatment, the cells were incubated *in situ* with appropriate standard substrates for CYP3A4 and CYP1A2 and their activity was quantified using LC-MS/MS via the metabolites formed. Following *in situ* incubation with standard substrates, the same hepatocytes were harvested from the different treatment groups, the RNA was isolated, and the effect of the test substances on the CYP1A2, CYP3A4, and CYP2B6 mRNA expression levels was determined using qRT-PCR.

### ***In vivo* studies general information**

All animal studies were conducted in accordance with the German Animal Welfare Act and the French directives and the ethical guidelines of Bayer AG and were approved by the local ethics committee.

### **Pharmacokinetics in rats**

Male Wistar rats were obtained from Harlan Laboratories (Horst, The Netherlands) and had access to food and water *ad libitum*. All animals were housed according to institutional guidelines under a 12 h/12 h light/dark cycle and maintained under standard conditions (20–22 °C, 50–70% humidity). Rats were housed in Makrolon cages type IV (4 animals/cage), fed

a pelleted standard maintenance diet (Ssniff, Spezialdiäten GmbH, Soest, Germany), and used for *in vivo* studies at a weight of 200–300 g.

For *in vivo* PK experiments, test compounds were administered to male Wistar rats iv at a dose of 0.5 mg/kg and po at a dose of 2.0 mg/kg, formulated as solutions using solubilizers such as PEG400, Solutol, and EtOH in well-tolerated amounts. Blood samples were collected from the vena jugularis at 2 min (iv only), 8 min, 15 min, 30 min, 45 min, 1 h, 2 h, 4 h, 7 h, 24 h, and 48 h (if needed) after dosing, saved in lithium heparin tubes (Monovette®, Sarstedt, Germany), and centrifuged for 15 min at 3000 rpm. An aliquot of 100  $\mu$ L of the supernatant (plasma) was taken and precipitated by the addition of 400  $\mu$ L cold acetonitrile. Samples were frozen at  $-20$  °C overnight, and subsequently thawed and centrifuged at 3000 rpm and 4 °C for 20 min. Aliquots of the supernatant were analyzed with an Agilent HPLC system with LC-MS/MS detection (Agilent Technologies, Inc., Santa Clara, US). Pharmacokinetic parameters were calculated by non-compartmental analysis using pharmacokinetics calculation software (e.g., Phoenix WinNonlin 6.3, Certara USA, Inc.).

### **Pharmacokinetics in mice**

Female NMRI mice were obtained from Charles River Laboratories (Sulzfeld, Germany) and had access to food and water ad libitum. All animals were housed according to institutional guidelines under a 12 h/12 h light/dark cycle and maintained under standard conditions (20–22 °C, 50–70% humidity). Mice were housed in Makrolon cages type IV (10 animals/cage), fed a pelleted diet (see above, Ssniff, Spezialdiäten GmbH, Soest, Germany), and used for *in vivo* studies at a weight of 20–30 g.

For *in vivo* PK experiments, test compounds were administered to female NMRI mice iv at a dose of 0.5 mg/kg, formulated as solutions using solubilizers such as PEG400 and EtOH in well-tolerated amounts. Blood samples were collected from the vena jugularis at 2 min, 8 min, 15 min, 30 min, 1 h, 2 h, 4 h, 7 h, and 24 h after dosing, saved in lithium heparin tubes (Monovette®, Sarstedt, Germany), and centrifuged for 15 min at 3000 rpm. An aliquot of 100  $\mu$ L from the supernatant (plasma) was taken and precipitated by the addition of 400  $\mu$ L cold acetonitrile. The next intermediates in processing the samples as well as the data evaluation are described above (see section ‘Pharmacokinetics in Rats’).

### **Pharmacokinetics in beagle dogs**

All animals were housed according to institutional guidelines under a 12 h/12 h light/dark cycle and maintained under standard conditions. For *in vivo* pharmacokinetic experiments, test compounds were administered to female or male dogs iv for 15 min at a dose of 0.5

mg/kg and po at a dose of 2.0 mg/kg, formulated as solutions using solubilizers such as PEG400 and EtOH in well-tolerated amounts. Blood samples were collected from the Vena cephalica antebrachii at 5 min, 10 min, 15 min (prior end of infusion), 20 min, 30 min, 1 h, 2 h, 4 h, 7 h, 24 h, and 48 h (if needed) after iv infusion dosing and at 5 min, 15 min, 30 min, 1 h, 2 h, 4 h, 7 h, 24 h, and 48 h after po dosing (if needed). Samples were stored in lithium heparin tubes (Monovette, Sarstedt) and centrifuged for 15 min at 3000 rpm. An aliquot of 100  $\mu$ L from the supernatant (plasma) was taken and precipitated by the addition of 400  $\mu$ L cold acetonitrile. The next intermediates in processing the samples as well as the data evaluation are described above (see section 'Pharmacokinetics in Rats').

### *In vitro* pharmacology

#### **Kinase assays**

The inhibitory activities of the compounds against IRAK4, FLT3, and TrkA were measured in TR-FRET-based kinase activity inhibition assays using purified recombinant proteins as enzymes and biotinylated peptides or a biotinylated poly-Glu,Tyr(4:1)-copolymer as substrate (Table S1). For the assays, 50 nL of a 100-fold concentrated solution of the test compound in DMSO was pipetted into a black, low-volume, 1536-well microtiter plate (Greiner Bio-One, Frickenhausen, Germany); 2  $\mu$ L of enzyme solution in aqueous assay buffer (see below) was added; and the mixture was incubated for 15 min at 22 °C to allow prebinding of the test compound to the enzyme before the start of the kinase reaction. The kinase reaction was then started by the addition of 3  $\mu$ L of a solution of ATP (final conc.: 10  $\mu$ M [FLT3, Trk-A] or 1 mM [IRAK4]) and substrate to the assay buffer; the resulting mixture was incubated for a reaction time of 45 min (IRAK4, FLT3) or 60 min (TrkA) at 22 °C. The concentrations of the enzymes were adjusted depending on the activity of the enzyme lot; the choice of enzyme was based on which enzyme lot kept the assay in the linear range. Typical concentrations were in the range of 0.1–0.3 nM. The reaction was stopped by the addition of 5  $\mu$ L of a solution of TR-FRET detection reagents in an aqueous EDTA (see below). The resulting mixture was incubated for 1 h at 22 °C to allow the formation of a complex between the phosphorylated biotinylated peptide and the detection reagents. Subsequently, the amount of phosphorylated substrate was evaluated by measuring the resonance energy transfer from the europium chelate to streptavidin-XL665. To do this, fluorescence emissions at 620 nm and 665 nm after excitation at 350 nm were measured with a PHERAstar FS reader (BMG Labtech, Offenburg, Germany). The ratio of the emissions at 665 nm and at 620 nm was considered the amount of phosphorylated substrate. The compounds were tested on the

same microtiter plate at 11 different concentrations in the range 20  $\mu$ M to 0.07 nM (the dilution series was prepared separately, before the assay, using 100-fold concentrated solutions in DMSO by serial dilutions) in duplicate for each concentration. IC<sub>50</sub> values were calculated using Genedata Screener™ software.

**Table S1. Summary of kinase assays.**

|              | IRAK4                                                                                                                                                                                                                                                                                                                | FLT3                                                                                                  | TrkA                                                                                                                                     |
|--------------|----------------------------------------------------------------------------------------------------------------------------------------------------------------------------------------------------------------------------------------------------------------------------------------------------------------------|-------------------------------------------------------------------------------------------------------|------------------------------------------------------------------------------------------------------------------------------------------|
| Enzyme       | Human:<br>Recombinant fusion protein from N-terminal GST (glutathione S-transferase) and human IRAK4, expressed in baculovirus-infected insect cells (Hi5)<br><br>Rat, mouse, monkey, and dog: N-terminally His6-tagged recombinant IRAK4 (respective species), expressed in baculovirus-infected insect cells (Hi5) | Recombinant fusion protein from N-terminal GST and human FLT3 (aa 564-end (Merck Millipore # 14-500)) | Recombinant fusion protein of N-terminally His6-tagged GST and a C-terminal fragment of human TrkA (aa 443-796, ProQinase # 0311-0000-2) |
| Assay buffer | 50 mM HEPES pH 7.5, 5 mM MgCl <sub>2</sub> , 1 mM DTT, 30 $\mu$ M activated sodium <i>ortho</i> -vanadate, 0.1% (w/v) BGG,                                                                                                                                                                                           | 25 mM HEPES pH 7.5, 10 mM MgCl <sub>2</sub> , 5 mM glycerol-2-phosphate, 2 mM DTT, 0.5 mM             | 8 mM MOPS/HCl pH 7.0, 10 mM MgCl <sub>2</sub> , 1 mM DTT, 0.2 mM EDTA, 0.01% (v/v) Nonidet-P40                                           |

|                                    |                                                                                                                                                                                                                                                                                                       |                                                                                                                                               |                                                                                                                |
|------------------------------------|-------------------------------------------------------------------------------------------------------------------------------------------------------------------------------------------------------------------------------------------------------------------------------------------------------|-----------------------------------------------------------------------------------------------------------------------------------------------|----------------------------------------------------------------------------------------------------------------|
|                                    | 0.04% (v/v)<br>Nonidet-P40<br>(Sigma-Aldrich, St. Louis, USA)                                                                                                                                                                                                                                         | EDTA, 0.01% (v/v)<br>Triton X-100<br>(Sigma-Alrich, St. Louis, USA)                                                                           |                                                                                                                |
| Substrate                          | Biotin-Ahx-KKARFSRFAGSSP SQASFAEPG (C-terminus in amide form), final conc. in enzyme reaction: 0.5 $\mu$ M                                                                                                                                                                                            | Biotin-Ahx-GGEEEEYFELVKK KK (C-terminus in amide form), final conc. in enzyme reaction: 1 $\mu$ M                                             | Biotinylated poly-Glu,Tyr (4:1)-copolymer (CisBio # 61GT0BLA), final conc. in enzyme reaction: 1.36 $\mu$ g/mL |
| TR-FRET detection reagent solution | 25 mM HEPES pH 7.5, 100 mM EDTA, 0.1 $\mu$ M streptavidin-XL665 (Cisbio Bioassays; # 610SAXLG), 1.5 nM anti-phosphoserine antibody (Merck Millipore, (Darmstadt, Germany), # 35-002), 0.6 nM LANCE EU-W1024-labelled anti-mouse-IgG antibody (Perkin-Elmer (Waltham, USA), # AD0077), 0.4 % (w/v) BSA | 50 mM HEPES pH 7.5, 50 mM EDTA, 0.2 $\mu$ M streptavidin-XL665, 3 nM PT66-Eu-chelate (PerkinElmer, (Waltham, USA), # AD0069), 0.1 % (w/v) BSA | 50 mM HEPES/HCl pH 7.0, 100 mM EDTA, 30 nM streptavidin-XL665, 1.4 nM PT66-Eu-chelate, 0.2 % (w/v) BSA         |

BGG, bovine gamma-globulin; BSA, bovine serum albumine; DTT, dithiothreitol; EDTA, ethylenediaminetetraacetic acid; GST, glutathione S-transferase; HEPES, 4-(2-



hydroxyethyl)-1-piperazineethanesulfonic acid; MOPS, 3-(*N*-morpholino)propanesulfonic acid.

**DiscoverX KINOMEScan™ data**

Kinase selectivity data was assessed using KINOMEScan™ provided by DiscoverX Corporation, 42501 Albrae Street, Fremont, CA 94538-3142:<sup>1</sup> BAY1830839 and BAY1834845 were tested using two concentrations (100 nM and 1000 nM)

**Table S2. Matrix of compound screen for BAY1830839.**

| Target                        | BAY1830839     |   |                 |   |
|-------------------------------|----------------|---|-----------------|---|
| Gene Symbol                   | %Ctrl<br>100nM | @ | %Ctrl<br>1000nM | @ |
| AAK1                          | 74             |   | 51              |   |
| ABL1(E255K)-phosphorylated    | 100            |   | 96              |   |
| ABL1(F317I)-nonphosphorylated | 100            |   | 100             |   |
| ABL1(F317I)-phosphorylated    | 100            |   | 98              |   |
| ABL1(F317L)-nonphosphorylated | 100            |   | 95              |   |
| ABL1(F317L)-phosphorylated    | 90             |   | 92              |   |
| ABL1(H396P)-nonphosphorylated | 100            |   | 100             |   |
| ABL1(H396P)-phosphorylated    | 94             |   | 94              |   |
| ABL1(M351T)-phosphorylated    | 92             |   | 94              |   |
| ABL1(Q252H)-nonphosphorylated | 100            |   | 94              |   |
| ABL1(Q252H)-phosphorylated    | 99             |   | 100             |   |
| ABL1(T315I)-nonphosphorylated | 100            |   | 95              |   |
| ABL1(T315I)-phosphorylated    | 92             |   | 84              |   |
| ABL1(Y253F)-phosphorylated    | 100            |   | 100             |   |
| ABL1-nonphosphorylated        | 100            |   | 95              |   |
| ABL1-phosphorylated           | 100            |   | 100             |   |
| ABL2                          | 88             |   | 100             |   |
| ACVR1                         | 96             |   | 100             |   |
| ACVR1B                        | 94             |   | 97              |   |
| ACVR2A                        | 92             |   | 90              |   |
| ACVR2B                        | 98             |   | 83              |   |
| ACVRL1                        | 100            |   | 100             |   |
| ADCK3                         | 97             |   | 83              |   |
| ADCK4                         | 99             |   | 100             |   |
| AKT1                          | 87             |   | 100             |   |
| AKT2                          | 90             |   | 100             |   |
| AKT3                          | 92             |   | 98              |   |
| ALK                           | 100            |   | 91              |   |
| ALK(C1156Y)                   | 94             |   | 81              |   |
| ALK(L1196M)                   | 86             |   | 96              |   |
| AMPK-alpha1                   | 100            |   | 93              |   |
| AMPK-alpha2                   | 100            |   | 97              |   |
| ANKK1                         | 96             |   | 84              |   |
| ARK5                          | 100            |   | 79              |   |
| ASK1                          | 86             |   | 96              |   |
| ASK2                          | 100            |   | 100             |   |
| AURKA                         | 77             |   | 76              |   |
| AURKB                         | 91             |   | 89              |   |
| AURKC                         | 98             |   | 91              |   |
| AXL                           | 100            |   | 91              |   |
| BIKE                          | 93             |   | 38              |   |
| BLK                           | 82             |   | 66              |   |
| BMPR1A                        | 89             |   | 95              |   |
| BMPR1B                        | 82             |   | 85              |   |
| BMPR2                         | 92             |   | 83              |   |
| BMX                           | 91             |   | 76              |   |
| BRAF                          | 92             |   | 81              |   |
| BRAF(V600E)                   | 91             |   | 86              |   |

| Target              | BAY1830839     |   |                 |   |
|---------------------|----------------|---|-----------------|---|
| Gene Symbol         | %Ctrl<br>100nM | @ | %Ctrl<br>1000nM | @ |
| BRK                 | 97             |   | 92              |   |
| BRSK1               | 82             |   | 100             |   |
| BRSK2               | 95             |   | 92              |   |
| BTK                 | 100            |   | 97              |   |
| BUB1                | 97             |   | 96              |   |
| CAMK1               | 83             |   | 100             |   |
| CAMK1D              | 96             |   | 100             |   |
| CAMK1G              | 80             |   | 65              |   |
| CAMK2A              | 98             |   | 89              |   |
| CAMK2B              | 100            |   | 83              |   |
| CAMK2D              | 87             |   | 83              |   |
| CAMK2G              | 95             |   | 79              |   |
| CAMK4               | 100            |   | 100             |   |
| CAMKK1              | 84             |   | 50              |   |
| CAMKK2              | 80             |   | 39              |   |
| CASK                | 100            |   | 100             |   |
| CDC2L1              | 97             |   | 93              |   |
| CDC2L2              | 98             |   | 98              |   |
| CDC2L5              | 100            |   | 97              |   |
| CDK11               | 88             |   | 100             |   |
| CDK2                | 100            |   | 100             |   |
| CDK3                | 94             |   | 100             |   |
| CDK4-cyclinD1       | 98             |   | 88              |   |
| CDK4-cyclinD3       | 100            |   | 100             |   |
| CDK5                | 91             |   | 99              |   |
| CDK7                | 96             |   | 91              |   |
| CDK8                | 89             |   | 100             |   |
| CDK9                | 86             |   | 82              |   |
| CDKL1               | 90             |   | 77              |   |
| CDKL2               | 94             |   | 100             |   |
| CDKL3               | 89             |   | 96              |   |
| CDKL5               | 99             |   | 81              |   |
| CHEK1               | 95             |   | 100             |   |
| CHEK2               | 83             |   | 77              |   |
| CIT                 | 100            |   | 95              |   |
| CLK1                | 92             |   | 89              |   |
| CLK2                | 100            |   | 54              |   |
| CLK3                | 100            |   | 94              |   |
| CLK4                | 100            |   | 86              |   |
| CSF1R               | 88             |   | 87              |   |
| CSF1R-autoinhibited | 100            |   | 89              |   |
| CSK                 | 100            |   | 100             |   |
| CSNK1A1             | 89             |   | 93              |   |
| CSNK1A1L            | 95             |   | 100             |   |
| CSNK1D              | 99             |   | 100             |   |
| CSNK1E              | 99             |   | 66              |   |
| CSNK1G1             | 92             |   | 77              |   |
| CSNK1G2             | 100            |   | 100             |   |
| CSNK1G3             | 96             |   | 98              |   |

| Target                       | BAY1830839     |   |                 |   |
|------------------------------|----------------|---|-----------------|---|
| Gene Symbol                  | %Ctrl<br>100nM | @ | %Ctrl<br>1000nM | @ |
| CSNK2A1                      | 90             |   | 76              |   |
| CSNK2A2                      | 98             |   | 96              |   |
| CTK                          | 100            |   | 100             |   |
| DAPK1                        | 95             |   | 90              |   |
| DAPK2                        | 100            |   | 89              |   |
| DAPK3                        | 100            |   | 87              |   |
| DCAMKL1                      | 88             |   | 80              |   |
| DCAMKL2                      | 97             |   | 92              |   |
| DCAMKL3                      | 100            |   | 100             |   |
| DDR1                         | 100            |   | 100             |   |
| DDR2                         | 92             |   | 94              |   |
| DLK                          | 98             |   | 98              |   |
| DMPK                         | 88             |   | 100             |   |
| DMPK2                        | 94             |   | 100             |   |
| DRAK1                        | 97             |   | 100             |   |
| DRAK2                        | 96             |   | 95              |   |
| DYRK1A                       | 97             |   | 78              |   |
| DYRK1B                       | 67             |   | 61              |   |
| DYRK2                        | 87             |   | 100             |   |
| EGFR                         | 78             |   | 84              |   |
| EGFR(E746-A750del)           | 90             |   | 100             |   |
| EGFR(G719C)                  | 98             |   | 93              |   |
| EGFR(G719S)                  | 87             |   | 86              |   |
| EGFR(L747-E749del,<br>A750P) | 75             |   | 83              |   |
| EGFR(L747-S752del,<br>P753S) | 100            |   | 100             |   |
| EGFR(L747-<br>T751del,Sins)  | 90             |   | 88              |   |
| EGFR(L858R)                  | 84             |   | 100             |   |
| EGFR(L858R,T790M)            | 91             |   | 76              |   |
| EGFR(L861Q)                  | 88             |   | 89              |   |
| EGFR(S752-I759del)           | 97             |   | 92              |   |
| EGFR(T790M)                  | 94             |   | 95              |   |
| EIF2AK1                      | 98             |   | 80              |   |
| EPHA1                        | 100            |   | 100             |   |
| EPHA2                        | 97             |   | 78              |   |
| EPHA3                        | 75             |   | 81              |   |
| EPHA4                        | 100            |   | 91              |   |
| EPHA5                        | 92             |   | 95              |   |
| EPHA6                        | 100            |   | 90              |   |
| EPHA7                        | 91             |   | 100             |   |
| EPHA8                        | 84             |   | 100             |   |
| EPHB1                        | 85             |   | 100             |   |
| EPHB2                        | 62             |   | 64              |   |
| EPHB3                        | 100            |   | 94              |   |
| EPHB4                        | 100            |   | 98              |   |
| EPHB6                        | 93             |   | 91              |   |
| ERBB2                        | 81             |   | 83              |   |
| ERBB3                        | 100            |   | 100             |   |
| ERBB4                        | 94             |   | 100             |   |
| ERK1                         | 100            |   | 100             |   |

| Target                | BAY1830839     |   |                 |   |
|-----------------------|----------------|---|-----------------|---|
| Gene Symbol           | %Ctrl<br>100nM | @ | %Ctrl<br>1000nM | @ |
| ERK2                  | 91             |   | 97              |   |
| ERK3                  | 89             |   | 100             |   |
| ERK4                  | 90             |   | 76              |   |
| ERK5                  | 96             |   | 96              |   |
| ERK8                  | 97             |   | 88              |   |
| ERN1                  | 91             |   | 92              |   |
| FAK                   | 95             |   | 100             |   |
| FER                   | 91             |   | 100             |   |
| FES                   | 100            |   | 92              |   |
| FGFR1                 | 95             |   | 74              |   |
| FGFR2                 | 90             |   | 71              |   |
| FGFR3                 | 96             |   | 68              |   |
| FGFR3(G697C)          | 91             |   | 88              |   |
| FGFR4                 | 94             |   | 99              |   |
| FGR                   | 100            |   | 96              |   |
| FLT1                  | 100            |   | 96              |   |
| FLT3                  | 100            |   | 77              |   |
| FLT3(D835H)           | 76             |   | 33              |   |
| FLT3(D835Y)           | 79             |   | 21              |   |
| FLT3(ITD)             | 87             |   | 27              |   |
| FLT3(K663Q)           | 99             |   | 73              |   |
| FLT3(N841I)           | 81             |   | 30              |   |
| FLT3(R834Q)           | 100            |   | 73              |   |
| FLT3-autoinhibited    | 100            |   | 97              |   |
| FLT4                  | 100            |   | 100             |   |
| FRK                   | 95             |   | 95              |   |
| FYN                   | 100            |   | 99              |   |
| GAK                   | 90             |   | 68              |   |
| GCN2(Kin.Dom.2,S808G) | 99             |   | 88              |   |
| GRK1                  | 100            |   | 100             |   |
| GRK4                  | 95             |   | 95              |   |
| GRK7                  | 77             |   | 65              |   |
| GSK3A                 | 100            |   | 100             |   |
| GSK3B                 | 86             |   | 85              |   |
| HASPIN                | 87             |   | 79              |   |
| HCK                   | 93             |   | 70              |   |
| HIPK1                 | 79             |   | 64              |   |
| HIPK2                 | 96             |   | 97              |   |
| HIPK3                 | 97             |   | 86              |   |
| HIPK4                 | 88             |   | 96              |   |
| HPK1                  | 81             |   | 65              |   |
| HUNK                  | 100            |   | 100             |   |
| ICK                   | 92             |   | 100             |   |
| IGF1R                 | 96             |   | 100             |   |
| IKK-alpha             | 95             |   | 100             |   |
| IKK-beta              | 88             |   | 84              |   |
| IKK-epsilon           | 96             |   | 99              |   |
| INSR                  | 91             |   | 86              |   |
| INSRR                 | 87             |   | 100             |   |

| Target                       | BAY1830839     |                      |
|------------------------------|----------------|----------------------|
| Gene Symbol                  | %Ctrl<br>100nM | @<br>%Ctrl<br>1000nM |
| IRAK1                        | 50             | 7                    |
| IRAK3                        | 53             | 28                   |
| IRAK4                        | 0.15           | 0                    |
| ITK                          | 85             | 100                  |
| JAK1(JH1domain-catalytic)    | 100            | 97                   |
| JAK1(JH2domain-pseudokinase) | 97             | 34                   |
| JAK2(JH1domain-catalytic)    | 68             | 40                   |
| JAK3(JH1domain-catalytic)    | 93             | 72                   |
| JNK1                         | 90             | 90                   |
| JNK2                         | 84             | 77                   |
| JNK3                         | 90             | 80                   |
| KIT                          | 88             | 72                   |
| KIT(A829P)                   | 79             | 74                   |
| KIT(D816H)                   | 97             | 80                   |
| KIT(D816V)                   | 86             | 58                   |
| KIT(L576P)                   | 81             | 50                   |
| KIT(V559D)                   | 84             | 57                   |
| KIT(V559D,T670I)             | 83             | 80                   |
| KIT(V559D,V654A)             | 96             | 84                   |
| KIT-autoinhibited            | 96             | 95                   |
| LATS1                        | 91             | 97                   |
| LATS2                        | 84             | 100                  |
| LCK                          | 100            | 100                  |
| LIMK1                        | 99             | 100                  |
| LIMK2                        | 98             | 100                  |
| LKB1                         | 61             | 91                   |
| LOK                          | 100            | 94                   |
| LRRK2                        | 91             | 38                   |
| LRRK2(G2019S)                | 84             | 21                   |
| LTK                          | 100            | 93                   |
| LYN                          | 72             | 75                   |
| LZK                          | 93             | 79                   |
| MAK                          | 91             | 93                   |
| MAP3K1                       | 78             | 73                   |
| MAP3K15                      | 100            | 87                   |
| MAP3K2                       | 100            | 53                   |
| MAP3K3                       | 100            | 52                   |
| MAP3K4                       | 97             | 100                  |
| MAP4K2                       | 93             | 59                   |
| MAP4K3                       | 97             | 93                   |
| MAP4K4                       | 94             | 75                   |
| MAP4K5                       | 100            | 84                   |
| MAPKAPK2                     | 99             | 100                  |
| MAPKAPK5                     | 95             | 95                   |
| MARK1                        | 84             | 48                   |
| MARK2                        | 87             | 80                   |
| MARK3                        | 95             | 70                   |
| MARK4                        | 87             | 64                   |
| MAST1                        | 97             | 94                   |

| Target      | BAY1830839     |                      |
|-------------|----------------|----------------------|
| Gene Symbol | %Ctrl<br>100nM | @<br>%Ctrl<br>1000nM |
| MEK1        | 97             | 69                   |
| MEK2        | 89             | 55                   |
| MEK3        | 98             | 100                  |
| MEK4        | 100            | 100                  |
| MEK5        | 100            | 98                   |
| MEK6        | 83             | 81                   |
| MELK        | 85             | 54                   |
| MERTK       | 56             | 78                   |
| MET         | 92             | 100                  |
| MET(M1250T) | 98             | 99                   |
| MET(Y1235D) | 75             | 74                   |
| MINK        | 75             | 48                   |
| MKK7        | 95             | 88                   |
| MKKN1       | 86             | 97                   |
| MKKN2       | 91             | 92                   |
| MLCK        | 94             | 97                   |
| MLK1        | 97             | 92                   |
| MLK2        | 99             | 73                   |
| MLK3        | 98             | 98                   |
| MRCKA       | 100            | 100                  |
| MRCKB       | 89             | 99                   |
| MST1        | 100            | 95                   |
| MST1R       | 83             | 95                   |
| MST2        | 83             | 51                   |
| MST3        | 100            | 97                   |
| MST4        | 100            | 100                  |
| MTOR        | 100            | 90                   |
| MUSK        | 93             | 100                  |
| MYLK        | 100            | 95                   |
| MYLK2       | 97             | 94                   |
| MYLK4       | 83             | 89                   |
| MYO3A       | 97             | 96                   |
| MYO3B       | 88             | 99                   |
| NDR1        | 99             | 100                  |
| NDR2        | 98             | 100                  |
| NEK1        | 84             | 85                   |
| NEK10       | 89             | 92                   |
| NEK11       | 99             | 85                   |
| NEK2        | 89             | 73                   |
| NEK3        | 95             | 97                   |
| NEK4        | 70             | 81                   |
| NEK5        | 89             | 100                  |
| NEK6        | 89             | 90                   |
| NEK7        | 98             | 100                  |
| NEK9        | 98             | 100                  |
| NIK         | 92             | 100                  |
| NIM1        | 99             | 100                  |
| NLK         | 85             | 100                  |
| OSR1        | 100            | 100                  |

| Target<br>Gene Symbol | BAY1830839     |   |                 |   |
|-----------------------|----------------|---|-----------------|---|
|                       | %Ctrl<br>100nM | @ | %Ctrl<br>1000nM | @ |
| p38-alpha             | 98             |   | 100             |   |
| p38-beta              | 93             |   | 98              |   |
| p38-delta             | 93             |   | 100             |   |
| p38-gamma             | 79             |   | 82              |   |
| PAK1                  | 90             |   | 87              |   |
| PAK2                  | 75             |   | 46              |   |
| PAK3                  | 95             |   | 84              |   |
| PAK4                  | 100            |   | 96              |   |
| PAK6                  | 100            |   | 100             |   |
| PAK7                  | 97             |   | 98              |   |
| PCTK1                 | 91             |   | 87              |   |
| PCTK2                 | 95             |   | 90              |   |
| PCTK3                 | 99             |   | 94              |   |
| PDGFRA                | 100            |   | 100             |   |
| PDGFRB                | 100            |   | 100             |   |
| PDPK1                 | 89             |   | 95              |   |
| PFCDPK1(P.falciparum) | 70             |   | 93              |   |
| PFPK5(P.falciparum)   | 98             |   | 95              |   |
| PFTAIRE2              | 96             |   | 99              |   |
| PFTK1                 | 96             |   | 89              |   |
| PHKG1                 | 77             |   | 95              |   |
| PHKG2                 | 100            |   | 77              |   |
| PIK3C2B               | 93             |   | 93              |   |
| PIK3C2G               | 94             |   | 76              |   |
| PIK3CA                | 100            |   | 100             |   |
| PIK3CA(C420R)         | 96             |   | 85              |   |
| PIK3CA(E542K)         | 94             |   | 100             |   |
| PIK3CA(E545A)         | 97             |   | 78              |   |
| PIK3CA(E545K)         | 93             |   | 99              |   |
| PIK3CA(H1047L)        | 89             |   | 95              |   |
| PIK3CA(H1047Y)        | 100            |   | 77              |   |
| PIK3CA(I800L)         | 100            |   | 95              |   |
| PIK3CA(M1043I)        | 92             |   | 70              |   |
| PIK3CA(Q546K)         | 90             |   | 94              |   |
| PIK3CB                | 84             |   | 100             |   |
| PIK3CD                | 92             |   | 88              |   |
| PIK3CG                | 100            |   | 100             |   |
| PIK4CB                | 99             |   | 100             |   |
| PIM1                  | 99             |   | 98              |   |
| PIM2                  | 73             |   | 96              |   |
| PIM3                  | 95             |   | 100             |   |
| PIP5K1A               | 92             |   | 56              |   |
| PIP5K1C               | 100            |   | 100             |   |
| PIP5K2B               | 96             |   | 84              |   |
| PIP5K2C               | 99             |   | 100             |   |
| PKAC-alpha            | 86             |   | 90              |   |
| PKAC-beta             | 89             |   | 92              |   |
| PKMYT1                | 85             |   | 100             |   |
| PKN1                  | 100            |   | 100             |   |

| Target<br>Gene Symbol         | BAY1830839     |   |                 |   |
|-------------------------------|----------------|---|-----------------|---|
|                               | %Ctrl<br>100nM | @ | %Ctrl<br>1000nM | @ |
| PKN2                          | 97             |   | 78              |   |
| PKNB(M.tuberculosis)          | 87             |   | 89              |   |
| PLK1                          | 97             |   | 100             |   |
| PLK2                          | 86             |   | 76              |   |
| PLK3                          | 94             |   | 87              |   |
| PLK4                          | 92             |   | 91              |   |
| PRKCD                         | 95             |   | 80              |   |
| PRKCE                         | 100            |   | 100             |   |
| PRKCH                         | 100            |   | 86              |   |
| PRKCI                         | 98             |   | 91              |   |
| PRKCQ                         | 90             |   | 100             |   |
| PRKD1                         | 100            |   | 100             |   |
| PRKD2                         | 94             |   | 100             |   |
| PRKD3                         | 88             |   | 100             |   |
| PRKG1                         | 70             |   | 84              |   |
| PRKG2                         | 90             |   | 91              |   |
| PRKR                          | 95             |   | 72              |   |
| PRKX                          | 84             |   | 94              |   |
| PRP4                          | 100            |   | 100             |   |
| PYK2                          | 86             |   | 98              |   |
| QSK                           | 100            |   | 100             |   |
| RAF1                          | 98             |   | 100             |   |
| RET                           | 100            |   | 98              |   |
| RET(M918T)                    | 100            |   | 83              |   |
| RET(V804L)                    | 98             |   | 82              |   |
| RET(V804M)                    | 100            |   | 78              |   |
| RIOK1                         | 92             |   | 55              |   |
| RIOK2                         | 98             |   | 82              |   |
| RIOK3                         | 100            |   | 59              |   |
| RIPK1                         | 89             |   | 100             |   |
| RIPK2                         | 85             |   | 96              |   |
| RIPK4                         | 96             |   | 99              |   |
| RIPK5                         | 100            |   | 92              |   |
| ROCK1                         | 92             |   | 64              |   |
| ROCK2                         | 100            |   | 80              |   |
| ROS1                          | 100            |   | 100             |   |
| RPS6KA4(Kin.Dom.1-N-terminal) | 88             |   | 98              |   |
| RPS6KA4(Kin.Dom.2-C-terminal) | 85             |   | 90              |   |
| RPS6KA5(Kin.Dom.1-N-terminal) | 100            |   | 90              |   |
| RPS6KA5(Kin.Dom.2-C-terminal) | 95             |   | 100             |   |
| RSK1(Kin.Dom.1-N-terminal)    | 69             |   | 71              |   |
| RSK1(Kin.Dom.2-C-terminal)    | 100            |   | 86              |   |
| RSK2(Kin.Dom.1-N-terminal)    | 98             |   | 95              |   |
| RSK2(Kin.Dom.2-C-terminal)    | 89             |   | 90              |   |
| RSK3(Kin.Dom.1-N-terminal)    | 96             |   | 95              |   |
| RSK3(Kin.Dom.2-C-terminal)    | 100            |   | 89              |   |
| RSK4(Kin.Dom.1-N-terminal)    | 100            |   | 100             |   |
| RSK4(Kin.Dom.2-C-terminal)    | 100            |   | 80              |   |
| S6K1                          | 82             |   | 94              |   |

| Target                           | BAY1830839     |                      |
|----------------------------------|----------------|----------------------|
| Gene Symbol                      | %Ctrl<br>100nM | @<br>%Ctrl<br>1000nM |
| SBK1                             | 72             | 80                   |
| SGK                              | 89             | 94                   |
| SgK110                           | 99             | 86                   |
| SGK2                             | 99             | 100                  |
| SGK3                             | 100            | 100                  |
| SIK                              | 92             | 90                   |
| SIK2                             | 90             | 94                   |
| SLK                              | 100            | 100                  |
| SNARK                            | 100            | 95                   |
| SNRK                             | 100            | 94                   |
| SRC                              | 83             | 94                   |
| SRMS                             | 93             | 86                   |
| SRPK1                            | 98             | 89                   |
| SRPK2                            | 91             | 100                  |
| SRPK3                            | 100            | 100                  |
| STK16                            | 100            | 83                   |
| STK33                            | 79             | 72                   |
| STK35                            | 91             | 98                   |
| STK36                            | 100            | 99                   |
| STK39                            | 100            | 100                  |
| SYK                              | 87             | 58                   |
| TAK1                             | 73             | 30                   |
| TAOK1                            | 97             | 97                   |
| TAOK2                            | 92             | 88                   |
| TAOK3                            | 92             | 92                   |
| TBK1                             | 98             | 83                   |
| TEC                              | 91             | 100                  |
| TESK1                            | 93             | 98                   |
| TGFBR1                           | 96             | 94                   |
| TGFBR2                           | 100            | 100                  |
| TIE1                             | 88             | 100                  |
| TIE2                             | 91             | 93                   |
| TLK1                             | 100            | 98                   |
| TLK2                             | 94             | 78                   |
| TNIK                             | 75             | 60                   |
| TNK1                             | 95             | 86                   |
| TNK2                             | 95             | 100                  |
| TNNI3K                           | 99             | 100                  |
| TRKA                             | 84             | 39                   |
| TRKB                             | 79             | 26                   |
| TRKC                             | 84             | 43                   |
| TRPM6                            | 81             | 89                   |
| TSSK1B                           | 86             | 93                   |
| TTK                              | 71             | 92                   |
| TXK                              | 98             | 100                  |
| TYK2(JH1domain-<br>catalytic)    | 85             | 67                   |
| TYK2(JH2domain-<br>pseudokinase) | 100            | 100                  |
| TYRO3                            | 100            | 100                  |
| ULK1                             | 86             | 86                   |

| Target      | BAY1830839     |                      |
|-------------|----------------|----------------------|
| Gene Symbol | %Ctrl<br>100nM | @<br>%Ctrl<br>1000nM |
| ULK2        | 93             | 82                   |
| ULK3        | 97             | 83                   |
| VEGFR2      | 100            | 95                   |
| VRK2        | 89             | 73                   |
| WEE1        | 94             | 87                   |
| WEE2        | 98             | 100                  |
| WNK1        | 97             | 92                   |
| WNK3        | 97             | 92                   |
| YANK1       | 95             | 87                   |
| YANK2       | 100            | 99                   |
| YANK3       | 88             | 100                  |
| YES         | 98             | 100                  |
| YSK1        | 93             | 87                   |
| YSK4        | 97             | 100                  |
| ZAK         | 90             | 96                   |
| ZAP70       | 99             | 97                   |

**Table S3. Matrix of Compound Screen for BAY1834845.**

| Target                            | BAY1834845     |   |                 |   |
|-----------------------------------|----------------|---|-----------------|---|
| Gene Symbol                       | %Ctrl<br>100nM | @ | %Ctrl<br>1000nM | @ |
| AAK1                              | 100            |   | 80              |   |
| ABL1(E255K)-<br>phosphorylated    | 75             |   | 68              |   |
| ABL1(F317I)-<br>nonphosphorylated | 92             |   | 99              |   |
| ABL1(F317I)-<br>phosphorylated    | 88             |   | 78              |   |
| ABL1(F317L)-<br>nonphosphorylated | 87             |   | 93              |   |
| ABL1(F317L)-<br>phosphorylated    | 100            |   | 100             |   |
| ABL1(H396P)-<br>nonphosphorylated | 89             |   | 87              |   |
| ABL1(H396P)-<br>phosphorylated    | 89             |   | 80              |   |
| ABL1(M351T)-<br>phosphorylated    | 83             |   | 96              |   |
| ABL1(Q252H)-<br>nonphosphorylated | 71             |   | 67              |   |
| ABL1(Q252H)-<br>phosphorylated    | 88             |   | 96              |   |
| ABL1(T315I)-<br>nonphosphorylated | 100            |   | 100             |   |
| ABL1(T315I)-<br>phosphorylated    | 94             |   | 100             |   |
| ABL1(Y253F)-<br>phosphorylated    | 100            |   | 97              |   |
| ABL1-nonphosphorylated            | 80             |   | 83              |   |
| ABL1-phosphorylated               | 88             |   | 83              |   |
| ABL2                              | 100            |   | 100             |   |
| ACVR1                             | 100            |   | 100             |   |
| ACVR1B                            | 100            |   | 100             |   |
| ACVR2A                            | 76             |   | 78              |   |
| ACVR2B                            | 99             |   | 91              |   |
| ACVRL1                            | 100            |   | 100             |   |
| ADCK3                             | 96             |   | 87              |   |
| ADCK4                             | 87             |   | 88              |   |
| AKT1                              | 85             |   | 91              |   |
| AKT2                              | 100            |   | 100             |   |
| AKT3                              | 100            |   | 100             |   |
| ALK                               | 100            |   | 100             |   |
| ALK(C1156Y)                       | 100            |   | 95              |   |
| ALK(L1196M)                       | 100            |   | 100             |   |
| AMPK-alpha1                       | 92             |   | 99              |   |
| AMPK-alpha2                       | 100            |   | 100             |   |
| ANKK1                             | 83             |   | 68              |   |
| ARK5                              | 100            |   | 100             |   |
| ASK1                              | 99             |   | 85              |   |
| ASK2                              | 100            |   | 98              |   |
| AURKA                             | 100            |   | 100             |   |
| AURKB                             | 74             |   | 82              |   |
| AURKC                             | 85             |   | 98              |   |
| AXL                               | 100            |   | 100             |   |
| BIKE                              | 69             |   | 43              |   |
| BLK                               | 100            |   | 91              |   |
| BMPR1A                            | 71             |   | 63              |   |
| BMPR1B                            | 100            |   | 100             |   |
| BMPR2                             | 94             |   | 85              |   |
| BMX                               | 98             |   | 85              |   |
| BRAF                              | 89             |   | 86              |   |
| BRAF(V600E)                       | 88             |   | 97              |   |

| Target              | BAY1834845     |   |                 |   |
|---------------------|----------------|---|-----------------|---|
| Gene Symbol         | %Ctrl<br>100nM | @ | %Ctrl<br>1000nM | @ |
| BRK                 | 91             |   | 98              |   |
| BRSK1               | 100            |   | 100             |   |
| BRSK2               | 87             |   | 100             |   |
| BTK                 | 98             |   | 100             |   |
| BUB1                | 100            |   | 100             |   |
| CAMK1               | 59             |   | 91              |   |
| CAMK1D              | 100            |   | 95              |   |
| CAMK1G              | 98             |   | 85              |   |
| CAMK2A              | 96             |   | 80              |   |
| CAMK2B              | 100            |   | 86              |   |
| CAMK2D              | 100            |   | 100             |   |
| CAMK2G              | 98             |   | 94              |   |
| CAMK4               | 86             |   | 100             |   |
| CAMKK1              | 100            |   | 78              |   |
| CAMKK2              | 91             |   | 64              |   |
| CASK                | 82             |   | 78              |   |
| CDC2L1              | 100            |   | 100             |   |
| CDC2L2              | 100            |   | 100             |   |
| CDC2L5              | 100            |   | 100             |   |
| CDK11               | 100            |   | 94              |   |
| CDK2                | 99             |   | 100             |   |
| CDK3                | 74             |   | 73              |   |
| CDK4-cyclinD1       | 95             |   | 100             |   |
| CDK4-cyclinD3       | 100            |   | 99              |   |
| CDK5                | 96             |   | 100             |   |
| CDK7                | 90             |   | 90              |   |
| CDK8                | 96             |   | 77              |   |
| CDK9                | 100            |   | 100             |   |
| CDKL1               | 75             |   | 80              |   |
| CDKL2               | 96             |   | 94              |   |
| CDKL3               | 100            |   | 92              |   |
| CDKL5               | 100            |   | 100             |   |
| CHEK1               | 100            |   | 100             |   |
| CHEK2               | 75             |   | 93              |   |
| CIT                 | 100            |   | 100             |   |
| CLK1                | 89             |   | 81              |   |
| CLK2                | 99             |   | 70              |   |
| CLK3                | 77             |   | 81              |   |
| CLK4                | 100            |   | 100             |   |
| CSF1R               | 100            |   | 94              |   |
| CSF1R-autoinhibited | 98             |   | 100             |   |
| CSK                 | 100            |   | 94              |   |
| CSNK1A1             | 99             |   | 79              |   |
| CSNK1A1L            | 100            |   | 100             |   |
| CSNK1D              | 99             |   | 100             |   |
| CSNK1E              | 91             |   | 85              |   |
| CSNK1G1             | 100            |   | 100             |   |
| CSNK1G2             | 98             |   | 89              |   |
| CSNK1G3             | 97             |   | 86              |   |

| Target                   | BAY1834845     |                   |
|--------------------------|----------------|-------------------|
| Gene Symbol              | %Ctrl<br>100nM | @ %Ctrl<br>1000nM |
| CSNK2A1                  | 86             | 66                |
| CSNK2A2                  | 100            | 100               |
| CTK                      | 100            | 100               |
| DAPK1                    | 100            | 100               |
| DAPK2                    | 91             | 85                |
| DAPK3                    | 99             | 82                |
| DCAMKL1                  | 75             | 58                |
| DCAMKL2                  | 100            | 100               |
| DCAMKL3                  | 100            | 100               |
| DDR1                     | 71             | 100               |
| DDR2                     | 96             | 96                |
| DLK                      | 96             | 100               |
| DMPK                     | 100            | 100               |
| DMPK2                    | 96             | 88                |
| DRAK1                    | 100            | 100               |
| DRAK2                    | 100            | 100               |
| DYRK1A                   | 96             | 89                |
| DYRK1B                   | 90             | 96                |
| DYRK2                    | 81             | 85                |
| EGFR                     | 81             | 91                |
| EGFR(E746-A750del)       | 97             | 100               |
| EGFR(G719C)              | 100            | 98                |
| EGFR(G719S)              | 76             | 76                |
| EGFR(L747-E749del,A750P) | 100            | 97                |
| EGFR(L747-S752del,P753S) | 100            | 100               |
| EGFR(L747-T751del,Sins)  | 84             | 92                |
| EGFR(L858R)              | 100            | 100               |
| EGFR(L858R,T790M)        | 96             | 99                |
| EGFR(L861Q)              | 100            | 100               |
| EGFR(S752-I759del)       | 91             | 82                |
| EGFR(T790M)              | 84             | 82                |
| EIF2AK1                  | 100            | 100               |
| EPHA1                    | 91             | 91                |
| EPHA2                    | 98             | 96                |
| EPHA3                    | 100            | 100               |
| EPHA4                    | 97             | 100               |
| EPHA5                    | 100            | 98                |
| EPHA6                    | 99             | 100               |
| EPHA7                    | 100            | 99                |
| EPHA8                    | 100            | 100               |
| EPHB1                    | 97             | 88                |
| EPHB2                    | 98             | 89                |
| EPHB3                    | 93             | 97                |
| EPHB4                    | 100            | 100               |
| EPHB6                    | 82             | 84                |
| ERBB2                    | 100            | 100               |
| ERBB3                    | 96             | 98                |
| ERBB4                    | 88             | 90                |
| ERK1                     | 100            | 96                |

| Target                | BAY1834845     |                   |
|-----------------------|----------------|-------------------|
| Gene Symbol           | %Ctrl<br>100nM | @ %Ctrl<br>1000nM |
| ERK2                  | 100            | 79                |
| ERK3                  | 100            | 94                |
| ERK4                  | 100            | 100               |
| ERK5                  | 100            | 98                |
| ERK8                  | 87             | 75                |
| ERN1                  | 84             | 100               |
| FAK                   | 100            | 100               |
| FER                   | 98             | 100               |
| FES                   | 92             | 90                |
| FGFR1                 | 95             | 93                |
| FGFR2                 | 82             | 84                |
| FGFR3                 | 83             | 75                |
| FGFR3(G697C)          | 81             | 76                |
| FGFR4                 | 94             | 97                |
| FGR                   | 100            | 84                |
| FLT1                  | 89             | 100               |
| FLT3                  | 100            | 93                |
| FLT3(D835H)           | 62             | 30                |
| FLT3(D835Y)           | 100            | 36                |
| FLT3(ITD)             | 84             | 48                |
| FLT3(K663Q)           | 100            | 93                |
| FLT3(N841I)           | 94             | 52                |
| FLT3(R834Q)           | 100            | 100               |
| FLT3-autoinhibited    | 100            | 100               |
| FLT4                  | 81             | 94                |
| FRK                   | 98             | 100               |
| FYN                   | 95             | 93                |
| GAK                   | 100            | 100               |
| GCN2(Kin.Dom.2,S808G) | 100            | 100               |
| GRK1                  | 81             | 86                |
| GRK4                  | 77             | 100               |
| GRK7                  | 92             | 75                |
| GSK3A                 | 95             | 100               |
| GSK3B                 | 100            | 100               |
| HASPIN                | 92             | 98                |
| HCK                   | 100            | 100               |
| HIPK1                 | 79             | 65                |
| HIPK2                 | 87             | 92                |
| HIPK3                 | 100            | 100               |
| HIPK4                 | 80             | 88                |
| HPK1                  | 74             | 59                |
| HUNK                  | 96             | 95                |
| ICK                   | 100            | 100               |
| IGF1R                 | 100            | 88                |
| IKK-alpha             | 100            | 100               |
| IKK-beta              | 97             | 99                |
| IKK-epsilon           | 87             | 95                |
| INSR                  | 93             | 80                |
| INSRR                 | 91             | 92                |



| Target                       | BAY1834845     |                      |
|------------------------------|----------------|----------------------|
| Gene Symbol                  | %Ctrl<br>100nM | @<br>%Ctrl<br>1000nM |
| IRAK1                        | 89             | 20                   |
| IRAK3                        | 100            | 63                   |
| IRAK4                        | 0,3            | 0                    |
| ITK                          | 100            | 95                   |
| JAK1(JH1domain-catalytic)    | 93             | 100                  |
| JAK1(JH2domain-pseudokinase) | 90             | 27                   |
| JAK2(JH1domain-catalytic)    | 87             | 49                   |
| JAK3(JH1domain-catalytic)    | 94             | 67                   |
| JNK1                         | 84             | 87                   |
| JNK2                         | 88             | 86                   |
| JNK3                         | 100            | 100                  |
| KIT                          | 95             | 90                   |
| KIT(A829P)                   | 95             | 100                  |
| KIT(D816H)                   | 94             | 100                  |
| KIT(D816V)                   | 89             | 85                   |
| KIT(L576P)                   | 100            | 100                  |
| KIT(V559D)                   | 88             | 79                   |
| KIT(V559D,T670I)             | 100            | 96                   |
| KIT(V559D,V654A)             | 100            | 93                   |
| KIT-autoinhibited            | 98             | 92                   |
| LATS1                        | 100            | 88                   |
| LATS2                        | 93             | 98                   |
| LCK                          | 92             | 100                  |
| LIMK1                        | 100            | 100                  |
| LIMK2                        | 100            | 95                   |
| LKB1                         | 79             | 58                   |
| LOK                          | 100            | 100                  |
| LRRK2                        | 69             | 50                   |
| LRRK2(G2019S)                | 84             | 35                   |
| LTK                          | 100            | 100                  |
| LYN                          | 99             | 88                   |
| LZK                          | 100            | 100                  |
| MAK                          | 84             | 100                  |
| MAP3K1                       | 100            | 88                   |
| MAP3K15                      | 100            | 100                  |
| MAP3K2                       | 97             | 55                   |
| MAP3K3                       | 79             | 38                   |
| MAP3K4                       | 84             | 88                   |
| MAP4K2                       | 100            | 93                   |
| MAP4K3                       | 98             | 100                  |
| MAP4K4                       | 81             | 42                   |
| MAP4K5                       | 100            | 84                   |
| MAPKAPK2                     | 90             | 100                  |
| MAPKAPK5                     | 100            | 97                   |
| MARK1                        | 93             | 88                   |
| MARK2                        | 100            | 96                   |
| MARK3                        | 100            | 90                   |
| MARK4                        | 93             | 99                   |
| MAST1                        | 92             | 95                   |

| Target      | BAY1834845     |                      |
|-------------|----------------|----------------------|
| Gene Symbol | %Ctrl<br>100nM | @<br>%Ctrl<br>1000nM |
| MEK1        | 100            | 93                   |
| MEK2        | 91             | 81                   |
| MEK3        | 82             | 69                   |
| MEK4        | 100            | 100                  |
| MEK5        | 100            | 100                  |
| MEK6        | 100            | 100                  |
| MELK        | 95             | 97                   |
| MERTK       | 86             | 84                   |
| MET         | 100            | 99                   |
| MET(M1250T) | 93             | 100                  |
| MET(Y1235D) | 83             | 83                   |
| MINK        | 95             | 50                   |
| MKK7        | 98             | 100                  |
| MKMK1       | 100            | 99                   |
| MKMK2       | 100            | 100                  |
| MLCK        | 100            | 98                   |
| MLK1        | 100            | 86                   |
| MLK2        | 41             | 61                   |
| MLK3        | 100            | 100                  |
| MRCKA       | 95             | 83                   |
| MRCKB       | 100            | 100                  |
| MST1        | 100            | 97                   |
| MST1R       | 92             | 97                   |
| MST2        | 79             | 97                   |
| MST3        | 92             | 97                   |
| MST4        | 77             | 66                   |
| MTOR        | 96             | 94                   |
| MUSK        | 93             | 91                   |
| MYLK        | 68             | 56                   |
| MYLK2       | 100            | 100                  |
| MYLK4       | 99             | 90                   |
| MYO3A       | 100            | 100                  |
| MYO3B       | 93             | 81                   |
| NDR1        | 88             | 90                   |
| NDR2        | 100            | 97                   |
| NEK1        | 100            | 98                   |
| NEK10       | 100            | 100                  |
| NEK11       | 98             | 97                   |
| NEK2        | 100            | 99                   |
| NEK3        | 57             | 66                   |
| NEK4        | 96             | 80                   |
| NEK5        | 77             | 75                   |
| NEK6        | 100            | 100                  |
| NEK7        | 100            | 100                  |
| NEK9        | 90             | 93                   |
| NIK         | 100            | 100                  |
| NIM1        | 89             | 97                   |
| NLK         | 96             | 80                   |
| OSR1        | 100            | 100                  |

| Target                | BAY1834845     |   |                 |   |
|-----------------------|----------------|---|-----------------|---|
| Gene Symbol           | %Ctrl<br>100nM | @ | %Ctrl<br>1000nM | @ |
| p38-alpha             | 100            |   | 100             |   |
| p38-beta              | 100            |   | 100             |   |
| p38-delta             | 81             |   | 100             |   |
| p38-gamma             | 64             |   | 68              |   |
| PAK1                  | 100            |   | 80              |   |
| PAK2                  | 100            |   | 93              |   |
| PAK3                  | 92             |   | 99              |   |
| PAK4                  | 100            |   | 100             |   |
| PAK6                  | 100            |   | 100             |   |
| PAK7                  | 100            |   | 97              |   |
| PCTK1                 | 88             |   | 98              |   |
| PCTK2                 | 100            |   | 100             |   |
| PCTK3                 | 100            |   | 100             |   |
| PDGFRA                | 100            |   | 100             |   |
| PDGFRB                | 89             |   | 95              |   |
| PDPK1                 | 91             |   | 97              |   |
| PFCDPK1(P.falciparum) | 99             |   | 99              |   |
| PFPK5(P.falciparum)   | 92             |   | 91              |   |
| PFTAIRE2              | 100            |   | 93              |   |
| PFTK1                 | 99             |   | 93              |   |
| PHKG1                 | 99             |   | 96              |   |
| PHKG2                 | 100            |   | 86              |   |
| PIK3C2B               | 95             |   | 90              |   |
| PIK3C2G               | 96             |   | 100             |   |
| PIK3CA                | 100            |   | 95              |   |
| PIK3CA(C420R)         | 89             |   | 100             |   |
| PIK3CA(E542K)         | 98             |   | 100             |   |
| PIK3CA(E545A)         | 62             |   | 69              |   |
| PIK3CA(E545K)         | 68             |   | 82              |   |
| PIK3CA(H1047L)        | 100            |   | 100             |   |
| PIK3CA(H1047Y)        | 74             |   | 87              |   |
| PIK3CA(I800L)         | 77             |   | 89              |   |
| PIK3CA(M1043I)        | 96             |   | 96              |   |
| PIK3CA(Q546K)         | 98             |   | 97              |   |
| PIK3CB                | 100            |   | 100             |   |
| PIK3CD                | 100            |   | 97              |   |
| PIK3CG                | 98             |   | 90              |   |
| PIK4CB                | 100            |   | 100             |   |
| PIM1                  | 81             |   | 86              |   |
| PIM2                  | 47             |   | 83              |   |
| PIM3                  | 98             |   | 82              |   |
| PIP5K1A               | 84             |   | 100             |   |
| PIP5K1C               | 96             |   | 100             |   |
| PIP5K2B               | 100            |   | 93              |   |
| PIP5K2C               | 100            |   | 100             |   |
| PKAC-alpha            | 82             |   | 98              |   |
| PKAC-beta             | 100            |   | 99              |   |
| PKMYT1                | 100            |   | 100             |   |
| PKN1                  | 100            |   | 100             |   |

| Target                        | BAY1834845     |   |                 |   |
|-------------------------------|----------------|---|-----------------|---|
| Gene Symbol                   | %Ctrl<br>100nM | @ | %Ctrl<br>1000nM | @ |
| PKN2                          | 100            |   | 100             |   |
| PKNB(M.tuberculosis)          | 100            |   | 87              |   |
| PLK1                          | 80             |   | 87              |   |
| PLK2                          | 74             |   | 59              |   |
| PLK3                          | 71             |   | 57              |   |
| PLK4                          | 71             |   | 71              |   |
| PRKCD                         | 90             |   | 100             |   |
| PRKCE                         | 97             |   | 96              |   |
| PRKCH                         | 93             |   | 100             |   |
| PRKCI                         | 80             |   | 97              |   |
| PRKCQ                         | 100            |   | 100             |   |
| PRKD1                         | 100            |   | 98              |   |
| PRKD2                         | 100            |   | 100             |   |
| PRKD3                         | 100            |   | 100             |   |
| PRKG1                         | 100            |   | 100             |   |
| PRKG2                         | 87             |   | 91              |   |
| PRKR                          | 100            |   | 100             |   |
| PRKX                          | 100            |   | 100             |   |
| PRP4                          | 85             |   | 100             |   |
| PYK2                          | 71             |   | 74              |   |
| QSK                           | 93             |   | 71              |   |
| RAF1                          | 94             |   | 98              |   |
| RET                           | 100            |   | 100             |   |
| RET(M918T)                    | 84             |   | 93              |   |
| RET(V804L)                    | 86             |   | 83              |   |
| RET(V804M)                    | 100            |   | 76              |   |
| RIOK1                         | 100            |   | 92              |   |
| RIOK2                         | 100            |   | 98              |   |
| RIOK3                         | 95             |   | 89              |   |
| RIPK1                         | 83             |   | 75              |   |
| RIPK2                         | 99             |   | 90              |   |
| RIPK4                         | 100            |   | 100             |   |
| RIPK5                         | 90             |   | 80              |   |
| ROCK1                         | 100            |   | 99              |   |
| ROCK2                         | 100            |   | 91              |   |
| ROS1                          | 98             |   | 100             |   |
| RPS6KA4(Kin.Dom.1-N-terminal) | 100            |   | 100             |   |
| RPS6KA4(Kin.Dom.2-C-terminal) | 100            |   | 96              |   |
| RPS6KA5(Kin.Dom.1-N-terminal) | 95             |   | 84              |   |
| RPS6KA5(Kin.Dom.2-C-terminal) | 100            |   | 100             |   |
| RSK1(Kin.Dom.1-N-terminal)    | 100            |   | 100             |   |
| RSK1(Kin.Dom.2-C-terminal)    | 100            |   | 99              |   |
| RSK2(Kin.Dom.1-N-terminal)    | 79             |   | 89              |   |
| RSK2(Kin.Dom.2-C-terminal)    | 100            |   | 100             |   |
| RSK3(Kin.Dom.1-N-terminal)    | 100            |   | 100             |   |
| RSK3(Kin.Dom.2-C-terminal)    | 92             |   | 93              |   |
| RSK4(Kin.Dom.1-N-terminal)    | 80             |   | 81              |   |
| RSK4(Kin.Dom.2-C-terminal)    | 94             |   | 91              |   |
| S6K1                          | 95             |   | 98              |   |

| Target                           | BAY1834845     |                      |
|----------------------------------|----------------|----------------------|
| Gene Symbol                      | %Ctrl<br>100nM | @<br>%Ctrl<br>1000nM |
| SBK1                             | 100            | 100                  |
| SGK                              | 100            | 100                  |
| Sgk110                           | 98             | 88                   |
| SGK2                             | 100            | 100                  |
| SGK3                             | 97             | 100                  |
| SIK                              | 100            | 100                  |
| SIK2                             | 96             | 88                   |
| SLK                              | 98             | 100                  |
| SNARK                            | 95             | 100                  |
| SNRK                             | 93             | 96                   |
| SRC                              | 86             | 86                   |
| SRMS                             | 95             | 95                   |
| SRPK1                            | 90             | 100                  |
| SRPK2                            | 100            | 100                  |
| SRPK3                            | 93             | 100                  |
| STK16                            | 100            | 82                   |
| STK33                            | 92             | 100                  |
| STK35                            | 100            | 100                  |
| STK36                            | 93             | 73                   |
| STK39                            | 84             | 99                   |
| SYK                              | 92             | 83                   |
| TAK1                             | 83             | 45                   |
| TAOK1                            | 100            | 100                  |
| TAOK2                            | 72             | 73                   |
| TAOK3                            | 99             | 96                   |
| TBK1                             | 65             | 63                   |
| TEC                              | 100            | 100                  |
| TESK1                            | 80             | 76                   |
| TGFBR1                           | 100            | 99                   |
| TGFBR2                           | 100            | 100                  |
| TIE1                             | 90             | 78                   |
| TIE2                             | 90             | 96                   |
| TLK1                             | 100            | 100                  |
| TLK2                             | 100            | 94                   |
| TNIK                             | 97             | 60                   |
| TNK1                             | 96             | 93                   |
| TNK2                             | 100            | 100                  |
| TNNI3K                           | 100            | 97                   |
| TRKA                             | 100            | 48                   |
| TRKB                             | 91             | 40                   |
| TRKC                             | 94             | 67                   |
| TRPM6                            | 77             | 75                   |
| TSSK1B                           | 100            | 100                  |
| TTK                              | 100            | 100                  |
| TXK                              | 89             | 80                   |
| TYK2(JH1domain-<br>catalytic)    | 88             | 72                   |
| TYK2(JH2domain-<br>pseudokinase) | 100            | 100                  |
| TYRO3                            | 94             | 87                   |
| ULK1                             | 100            | 100                  |

| Target      | BAY1834845     |                      |
|-------------|----------------|----------------------|
| Gene Symbol | %Ctrl<br>100nM | @<br>%Ctrl<br>1000nM |
| ULK2        | 90             | 91                   |
| ULK3        | 99             | 89                   |
| VEGFR2      | 98             | 94                   |
| VRK2        | 95             | 100                  |
| WEE1        | 94             | 94                   |
| WEE2        | 95             | 100                  |
| WNK1        | 100            | 100                  |
| WNK3        | 100            | 100                  |
| YANK1       | 100            | 100                  |
| YANK2       | 100            | 100                  |
| YANK3       | 100            | 100                  |
| YES         | 100            | 97                   |
| YSK1        | 100            | 100                  |
| YSK4        | 100            | 100                  |
| ZAK         | 87             | 80                   |
| ZAP70       | 89             | 96                   |
| ULK2        | 90             | 91                   |
| ULK3        | 99             | 89                   |
| VEGFR2      | 98             | 94                   |
| VRK2        | 95             | 100                  |
| WEE1        | 94             | 94                   |
| WEE2        | 95             | 100                  |
| WNK1        | 100            | 100                  |
| WNK3        | 100            | 100                  |
| YANK1       | 100            | 100                  |
| YANK2       | 100            | 100                  |
| YANK3       | 100            | 100                  |
| YES         | 100            | 97                   |
| YSK1        | 100            | 100                  |
| YSK4        | 100            | 100                  |
| ZAK         | 87             | 80                   |
| ZAP70       | 89             | 96                   |
| ULK2        | 90             | 91                   |
| ULK3        | 99             | 89                   |
| VEGFR2      | 98             | 94                   |
| VRK2        | 95             | 100                  |
| WEE1        | 94             | 94                   |
| WEE2        | 95             | 100                  |
| WNK1        | 100            | 100                  |
| WNK3        | 100            | 100                  |
| YANK1       | 100            | 100                  |
| YANK2       | 100            | 100                  |
| YANK3       | 100            | 100                  |
| YES         | 100            | 97                   |
| YSK1        | 100            | 100                  |
| YSK4        | 100            | 100                  |
| ZAK         | 87             | 80                   |
| ZAP70       | 89             | 96                   |

**Table S4. Matrix of compound screen for compound 5**

| Target                        | Compound 5                                | Target              | Compound 5                                |
|-------------------------------|-------------------------------------------|---------------------|-------------------------------------------|
| Gene Symbol                   | % Ctrl @ 1 $\mu$ M compound concentration | Gene Symbol         | % Ctrl @ 1 $\mu$ M compound concentration |
| AAK1                          | 100                                       | CAMK4               | 100                                       |
| ABL1(E255K)-phosphorylated    | 73                                        | CAMKK1              | 100                                       |
| ABL1(F317I)-nonphosphorylated | 78                                        | CAMKK2              | 100                                       |
| ABL1(F317I)-phosphorylated    | 100                                       | CASK                | 100                                       |
| ABL1(F317L)-nonphosphorylated | 94                                        | CDC2L1              | 100                                       |
| ABL1(F317L)-phosphorylated    | 90                                        | CDC2L2              | 100                                       |
| ABL1(H396P)-nonphosphorylated | 58                                        | CDC2L5              | 78                                        |
| ABL1(H396P)-phosphorylated    | 59                                        | CDK11               | 100                                       |
| ABL1(M351T)-phosphorylated    | 96                                        | CDK2                | 100                                       |
| ABL1(Q252H)-nonphosphorylated | 52                                        | CDK3                | 100                                       |
| ABL1(Q252H)-phosphorylated    | 89                                        | CDK4-cyclinD1       | 98                                        |
| ABL1(T315I)-nonphosphorylated | 44                                        | CDK4-cyclinD3       | 41                                        |
| ABL1(T315I)-phosphorylated    | 85                                        | CDK5                | 100                                       |
| ABL1(Y253F)-phosphorylated    | 41                                        | CDK7                | 54                                        |
| ABL1-nonphosphorylated        | 93                                        | CDK8                | 100                                       |
| ABL1-phosphorylated           | 54                                        | CDK9                | 100                                       |
| ABL2                          | 97                                        | CDKL1               | 100                                       |
| ACVR1                         | 89                                        | CDKL2               | 84                                        |
| ACVR1B                        | 100                                       | CDKL3               | 100                                       |
| ACVR2A                        | 76                                        | CDKL5               | 95                                        |
| ACVR2B                        | 87                                        | CHEK1               | 100                                       |
| ACVRL1                        | 100                                       | CHEK2               | 100                                       |
| ADCK3                         | 99                                        | CIT                 | 79                                        |
| ADCK4                         | 100                                       | CLK1                | 100                                       |
| AKT1                          | 100                                       | CLK2                | 100                                       |
| AKT2                          | 96                                        | CLK3                | 100                                       |
| AKT3                          | 100                                       | CLK4                | 100                                       |
| ALK                           | 100                                       | CSF1R               | 100                                       |
| ALK(C1156Y)                   | 97                                        | CSF1R-autoinhibited | 80                                        |
| ALK(L1196M)                   | 100                                       | CSK                 | 100                                       |
| AMPK-alpha1                   | 100.00                                    | CSNK1A1             | 83                                        |
| AMPK-alpha2                   | 100.00                                    | CSNK1A1L            | 89                                        |
| ANKK1                         | 100.00                                    | CSNK1D              | 100                                       |
| ARK5                          | 68.00                                     | CSNK1E              | 100                                       |
| ASK1                          | 100.00                                    | CSNK1G1             | 100                                       |
| ASK2                          | 100.00                                    | CSNK1G2             | 100                                       |
| AURKA                         | 100.00                                    | CSNK1G3             | 100                                       |
| AURKB                         | 83.00                                     | CSNK2A1             | 83                                        |
| AURKC                         | 100.00                                    | CSNK2A2             | 100                                       |
| AXL                           | 100.00                                    | CTK                 | 100                                       |
| BIKE                          | 100                                       | DAPK1               | 98                                        |
| BLK                           | 100                                       | DAPK2               | 100                                       |
| BMPR1A                        | 96                                        | DAPK3               | 100                                       |
| BMPR1B                        | 96                                        | DCAMKL1             | 59                                        |
| BMPR2                         | 45                                        | DCAMKL2             | 100                                       |
| BMX                           | 100                                       | DCAMKL3             | 100                                       |
| BRAF                          | 77                                        | DDR1                | 100                                       |
| BRAF(V600E)                   | 73                                        | DDR2                | 100                                       |
| BRK                           | 98                                        | DLK                 | 99                                        |
| BRSK1                         | 100                                       | DMPK                | 100                                       |
| BRSK2                         | 100                                       | DMPK2               | 98                                        |
| BTK                           | 100                                       | DRAK1               | 100                                       |
| BUB1                          | 100                                       | DRAK2               | 100                                       |
| CAMK1                         | 100                                       | DYRK1A              | 73                                        |
| CAMK1D                        | 100                                       | DYRK1B              | 100                                       |
| CAMK1G                        | 100                                       | DYRK2               | 73                                        |
| CAMK2A                        | 100                                       | EGFR                | 100                                       |
| CAMK2B                        | 100                                       | EGFR(E746-A750del)  | 100                                       |
| CAMK2D                        | 100                                       | EGFR(G719C)         | 100                                       |
| CAMK2G                        | 100                                       | EGFR(G719S)         | 100                                       |

| Target                    | Compound 5                                |
|---------------------------|-------------------------------------------|
| Gene Symbol               | % Ctrl @ 1 $\mu$ M compound concentration |
| EGFR(L747-E749del, A750P) | 100                                       |
| EGFR(L747-S752del, P753S) | 100                                       |
| EGFR(L747-T751del,Sins)   | 100                                       |
| EGFR(L858R)               | 100                                       |
| EGFR(L858R,T790M)         | 100                                       |
| EGFR(L861Q)               | 100                                       |
| EGFR(S752-I759del)        | 100                                       |
| EGFR(T790M)               | 64                                        |
| EIF2AK1                   | 53                                        |
| EPHA1                     | 100                                       |
| EPHA2                     | 100                                       |
| EPHA3                     | 100                                       |
| EPHA4                     | 100                                       |
| EPHA5                     | 100                                       |
| EPHA6                     | 100                                       |
| EPHA7                     | 100                                       |
| EPHA8                     | 100                                       |
| EPHB1                     | 100                                       |
| EPHB2                     | 100                                       |
| EPHB3                     | 100                                       |
| EPHB4                     | 100                                       |
| EPHB6                     | 43                                        |
| ERBB2                     | 100                                       |
| ERBB3                     | 80                                        |
| ERBB4                     | 100                                       |
| ERK1                      | 100                                       |
| ERK2                      | 100                                       |
| ERK3                      | 100                                       |
| ERK4                      | 100                                       |
| ERK5                      | 100                                       |
| ERK8                      | 100                                       |
| ERN1                      | 39                                        |
| FAK                       | 100                                       |
| FER                       | 100                                       |
| FES                       | 100                                       |
| FGFR1                     | 98                                        |
| FGFR2                     | 100                                       |
| FGFR3                     | 100                                       |
| FGFR3(G697C)              | 95                                        |
| FGFR4                     | 100                                       |
| FGR                       | 100                                       |
| FLT1                      | 35                                        |
| FLT3                      | 100                                       |
| FLT3(D835H)               | 100                                       |
| FLT3(D835Y)               | 100                                       |
| FLT3(ITD)                 | 27                                        |
| FLT3(K663Q)               | 100                                       |
| FLT3(N841I)               | 98                                        |
| FLT3(R834Q)               | 100                                       |
| FLT3-autoinhibited        | 100                                       |
| FLT4                      | 87                                        |
| FRK                       | 100                                       |
| FYN                       | 100                                       |
| GAK                       | 100                                       |
| GCN2(Kin.Dom.2,S808G)     | 89                                        |
| GRK1                      | 81                                        |
| GRK4                      | 100                                       |
| GRK7                      | 100                                       |
| GSK3A                     | 100                                       |
| GSK3B                     | 74                                        |
| HASPIN                    | 100                                       |
| HCK                       | 94                                        |

| Target                       | Compound 5                                |
|------------------------------|-------------------------------------------|
| Gene Symbol                  | % Ctrl @ 1 $\mu$ M compound concentration |
| HIPK1                        | 66                                        |
| HIPK2                        | 100                                       |
| HIPK3                        | 96                                        |
| HIPK4                        | 100                                       |
| HPK1                         | 92                                        |
| HUNK                         | 100                                       |
| ICK                          | 100                                       |
| IGF1R                        | 100                                       |
| IKK-alpha                    | 65                                        |
| IKK-beta                     | 72                                        |
| IKK-epsilon                  | 100                                       |
| INSR                         | 100                                       |
| INSRR                        | 100                                       |
| IRAK1                        | 56                                        |
| IRAK3                        | 100                                       |
| IRAK4                        | 0.95                                      |
| ITK                          | 100                                       |
| JAK1(JH1domain-catalytic)    | 100                                       |
| JAK1(JH2domain-pseudokinase) | 47                                        |
| JAK2(JH1domain-catalytic)    | 100                                       |
| JAK3(JH1domain-catalytic)    | 92                                        |
| JNK1                         | 82                                        |
| JNK2                         | 92                                        |
| JNK3                         | 89                                        |
| KIT                          | 100                                       |
| KIT(A829P)                   | 100                                       |
| KIT(D816H)                   | 100                                       |
| KIT(D816V)                   | 100                                       |
| KIT(L576P)                   | 100                                       |
| KIT(V559D)                   | 100                                       |
| KIT(V559D,T670I)             | 100                                       |
| KIT(V559D,V654A)             | 100                                       |
| KIT-autoinhibited            | 99                                        |
| LATS1                        | 88                                        |
| LATS2                        | 49                                        |
| LCK                          | 99                                        |
| LIMK1                        | 100                                       |
| LIMK2                        | 100                                       |
| LKB1                         | 100                                       |
| LOK                          | 90                                        |
| LRRK2                        | 93                                        |
| LRRK2(G2019S)                | 86                                        |
| LTK                          | 100                                       |
| LYN                          | 87                                        |
| LZK                          | 100                                       |
| MAK                          | 100                                       |
| MAP3K1                       | 98                                        |
| MAP3K15                      | 88                                        |
| MAP3K2                       | 55                                        |
| MAP3K3                       | 78                                        |
| MAP3K4                       | 99                                        |
| MAP4K2                       | 91                                        |
| MAP4K3                       | 100                                       |
| MAP4K4                       | 100                                       |
| MAP4K5                       | 100                                       |
| MAPKAPK2                     | 100                                       |
| MAPKAPK5                     | 94                                        |
| MARK1                        | 100                                       |
| MARK2                        | 100                                       |
| MARK3                        | 98                                        |
| MARK4                        | 100                                       |
| MAST1                        | 100                                       |

| Target                | Compound 5                                |
|-----------------------|-------------------------------------------|
| Gene Symbol           | % Ctrl @ 1 $\mu$ M compound concentration |
| MEK1                  | 100                                       |
| MEK2                  | 99                                        |
| MEK3                  | 100                                       |
| MEK4                  | 100                                       |
| MEK5                  | 92                                        |
| MEK6                  | 100                                       |
| MELK                  | 100                                       |
| MERTK                 | 100                                       |
| MET                   | 100                                       |
| MET(M1250T)           | 100                                       |
| MET(Y1235D)           | 100                                       |
| MINK                  | 100                                       |
| MKK7                  | 100                                       |
| MKKN1                 | 100                                       |
| MKKN2                 | 91                                        |
| MLCK                  | 100                                       |
| MLK1                  | 100                                       |
| MLK2                  | 100                                       |
| MLK3                  | 100                                       |
| MRCKA                 | 100                                       |
| MRCKB                 | 100                                       |
| MST1                  | 100                                       |
| MST1R                 | 100                                       |
| MST2                  | 100                                       |
| MST3                  | 100                                       |
| MST4                  | 100                                       |
| MTOR                  | 100                                       |
| MUSK                  | 100                                       |
| MYLK                  | 65                                        |
| MYLK2                 | 100                                       |
| MYLK4                 | 100                                       |
| MYO3A                 | 100                                       |
| MYO3B                 | 100                                       |
| NDR1                  | 87                                        |
| NDR2                  | 82                                        |
| NEK1                  | 100                                       |
| NEK10                 | 98                                        |
| NEK11                 | 91                                        |
| NEK2                  | 100                                       |
| NEK3                  | 64                                        |
| NEK4                  | 100                                       |
| NEK5                  | 89                                        |
| NEK6                  | 100                                       |
| NEK7                  | 93                                        |
| NEK9                  | 97                                        |
| NIK                   | 100                                       |
| NIM1                  | 82                                        |
| NLK                   | 51                                        |
| OSR1                  | 100                                       |
| PAK1                  | 100                                       |
| PAK2                  | 100                                       |
| PAK3                  | 100                                       |
| PAK4                  | 94                                        |
| PAK6                  | 100                                       |
| PAK7                  | 100                                       |
| PCK1                  | 77                                        |
| PCK2                  | 100                                       |
| PCK3                  | 100                                       |
| PDGFRA                | 100                                       |
| PDGFRB                | 100                                       |
| PDPK1                 | 100                                       |
| PFCDPK1(P.falciparum) | 91                                        |

| Target               | Compound 5                                |
|----------------------|-------------------------------------------|
| Gene Symbol          | % Ctrl @ 1 $\mu$ M compound concentration |
| PFPK5(P.falciparum)  | 100                                       |
| PFTAIRE2             | 89                                        |
| PFTK1                | 100                                       |
| PHKG1                | 100                                       |
| PHKG2                | 100                                       |
| PIK3C2B              | 100                                       |
| PIK3C2G              | 95                                        |
| PIK3CA               | 100                                       |
| PIK3CA(C420R)        | 78                                        |
| PIK3CA(E542K)        | 100                                       |
| PIK3CA(E545A)        | 90                                        |
| PIK3CA(E545K)        | 100                                       |
| PIK3CA(H1047L)       | 100                                       |
| PIK3CA(H1047Y)       | 78                                        |
| PIK3CA(I800L)        | 100                                       |
| PIK3CA(M1043I)       | 100                                       |
| PIK3CA(Q546K)        | 89                                        |
| PIK3CB               | 47                                        |
| PIK3CD               | 100                                       |
| PIK3CG               | 87                                        |
| PIK4CB               | 83                                        |
| PIM1                 | 88                                        |
| PIM2                 | 100                                       |
| PIM3                 | 100                                       |
| PIP5K1A              | 100                                       |
| PIP5K1C              | 100                                       |
| PIP5K2B              | 100                                       |
| PIP5K2C              | 74                                        |
| PKAC-alpha           | 100                                       |
| PKAC-beta            | 100                                       |
| PKMYT1               | 100                                       |
| PKN1                 | 100                                       |
| PKN2                 | 100                                       |
| PKNB(M.tuberculosis) | 86                                        |
| PLK1                 | 100                                       |
| PLK2                 | 100                                       |
| PLK3                 | 80                                        |
| PLK4                 | 100                                       |
| PRKCD                | 100                                       |
| PRKCE                | 62                                        |
| PRKCH                | 100                                       |
| PRKCI                | 82                                        |
| PRKCQ                | 100                                       |
| PRKD1                | 89                                        |
| PRKD2                | 100                                       |
| PRKD3                | 63                                        |
| PRKG1                | 100                                       |
| PRKG2                | 100                                       |
| PRKR                 | 100                                       |
| PRKX                 | 100                                       |
| PRP4                 | 100                                       |
| PYK2                 | 92                                        |
| QSK                  | 91                                        |
| RAF1                 | 100                                       |
| RET                  | 100                                       |
| RET(M918T)           | 94                                        |
| RET(V804L)           | 100                                       |
| RET(V804M)           | 100                                       |
| RIOK1                | 26                                        |
| RIOK2                | 80                                        |
| RIOK3                | 100                                       |
| RIPK1                | 100                                       |

| Target                        | Compound 5                                |
|-------------------------------|-------------------------------------------|
| Gene Symbol                   | % Ctrl @ 1 $\mu$ M compound concentration |
| RIPK2                         | 100                                       |
| RIPK4                         | 89                                        |
| RIPK5                         | 41                                        |
| ROCK1                         | 75                                        |
| ROCK2                         | 95                                        |
| ROS1                          | 100                                       |
| RPS6KA4(Kin.Dom.1-N-terminal) | 82                                        |
| RPS6KA4(Kin.Dom.2-C-terminal) | 89                                        |
| RPS6KA5(Kin.Dom.1-N-terminal) | 100                                       |
| RPS6KA5(Kin.Dom.2-C-terminal) | 100                                       |
| RSK1(Kin.Dom.1-N-terminal)    | 100                                       |
| RSK1(Kin.Dom.2-C-terminal)    | 87                                        |
| RSK2(Kin.Dom.1-N-terminal)    | 81                                        |
| RSK2(Kin.Dom.2-C-terminal)    | 100                                       |
| RSK3(Kin.Dom.1-N-terminal)    | 100                                       |
| RSK3(Kin.Dom.2-C-terminal)    | 98                                        |
| RSK4(Kin.Dom.1-N-terminal)    | 92                                        |
| RSK4(Kin.Dom.2-C-terminal)    | 100                                       |
| S6K1                          | 100                                       |
| SBK1                          | 70                                        |
| SGK                           | 100                                       |
| SGK2                          | 100                                       |
| SGK3                          | 98                                        |
| SIK                           | 100                                       |
| SIK2                          | 98                                        |
| SLK                           | 100                                       |
| SNARK                         | 100                                       |
| SNRK                          | 96                                        |
| SRC                           | 90                                        |
| SRMS                          | 95                                        |
| SRPK1                         | 100                                       |
| SRPK2                         | 100                                       |
| SRPK3                         | 100                                       |
| STK16                         | 100                                       |
| STK33                         | 100                                       |
| STK35                         | 100                                       |
| STK36                         | 89                                        |
| STK39                         | 84                                        |
| SYK                           | 96                                        |
| Sgk110                        | 100                                       |
| TAK1                          | 54                                        |
| TAOK1                         | 100                                       |
| TAOK2                         | 82                                        |
| TAOK3                         | 100                                       |
| TBK1                          | 68                                        |
| TEC                           | 96                                        |
| TESK1                         | 100                                       |

| Target                       | Compound 5                                |
|------------------------------|-------------------------------------------|
| Gene Symbol                  | % Ctrl @ 1 $\mu$ M compound concentration |
| TGFBR1                       | 100                                       |
| TGFBR2                       | 100                                       |
| TIE1                         | 100                                       |
| TIE2                         | 100                                       |
| TLK1                         | 96                                        |
| TLK2                         | 100                                       |
| TNIK                         | 100                                       |
| TNK1                         | 87                                        |
| TNK2                         | 100                                       |
| TNNI3K                       | 100                                       |
| TRKA                         | 85                                        |
| TRKB                         | 88                                        |
| TRKC                         | 91                                        |
| TRPM6                        | 95                                        |
| TSSK1B                       | 100                                       |
| TTK                          | 100                                       |
| TXK                          | 100                                       |
| TYK2(JH1domain-catalytic)    | 100                                       |
| TYK2(JH2domain-pseudokinase) | 100                                       |
| TYRO3                        | 100                                       |
| ULK1                         | 72                                        |
| ULK2                         | 78                                        |
| ULK3                         | 86                                        |
| VEGFR2                       | 63                                        |
| VRK2                         | 100                                       |
| WEE1                         | 78                                        |
| WEE2                         | 91                                        |
| WNK1                         | 100                                       |
| WNK3                         | 100                                       |
| YANK1                        | 75                                        |
| YANK2                        | 100                                       |
| YANK3                        | 100                                       |
| YES                          | 100                                       |
| YSK1                         | 100                                       |
| YSK4                         | 100                                       |
| ZAK                          | 100                                       |
| ZAP70                        | 100                                       |
| p38-alpha                    | 100                                       |
| p38-beta                     | 95                                        |
| p38-delta                    | 100                                       |
| p38-gamma                    | 100                                       |

### Murine cellular potency

Cells were isolated from murine spleen and treated with either BAY1834845 or BAY1830839 in the presence of 1  $\mu$ g/mL LPS from *Escherichia coli* 0127:B8 (Sigma, L4516-1MG), respectively, for 24 hours. The amount of secreted TNF $\alpha$  was quantified using multiplex protein assay (Mouse ProInflammatory 7-Plex Mesoscale, MSD, N75012B-1) according to the manufacturer's instructions. IC<sub>50</sub> values were calculated using 4-parameter fit.

BAY1834845 or BAY1830839 inhibited the secretion of TNF $\alpha$  in LPS-stimulated murine splenic cells with an IC<sub>50</sub> of 385 nM and 47 nM, respectively.

### *In vivo* pharmacology

#### **IL-1-beta induced systemic inflammation in mice**

BALB/c mice (8 week old) were obtained from Charles River Laboratories, Germany and had access to food and water ad libitum. All animals were housed according to institutional guidelines under a 12 h/12 h light/dark cycle and maintained under standard conditions (20–22 °C, 50–70% humidity). Mice were divided into 5 animals per group. The test compound or its vehicle was orally administrated 6 hours before a total of 90  $\mu$ g of IL-1beta/kg body weight (R&D, Cat. No. 401-ML/CF) was administered intraperitoneally. Two hours after administration of the IL-1beta, TNF-alpha and IL-6 were determined in the plasma after final removal of blood using the Mouse ProInflammatory 7-Plex Tissue Culture Kit (MSD, Cat. No. K15012B) in accordance with manufacturer's instructions.

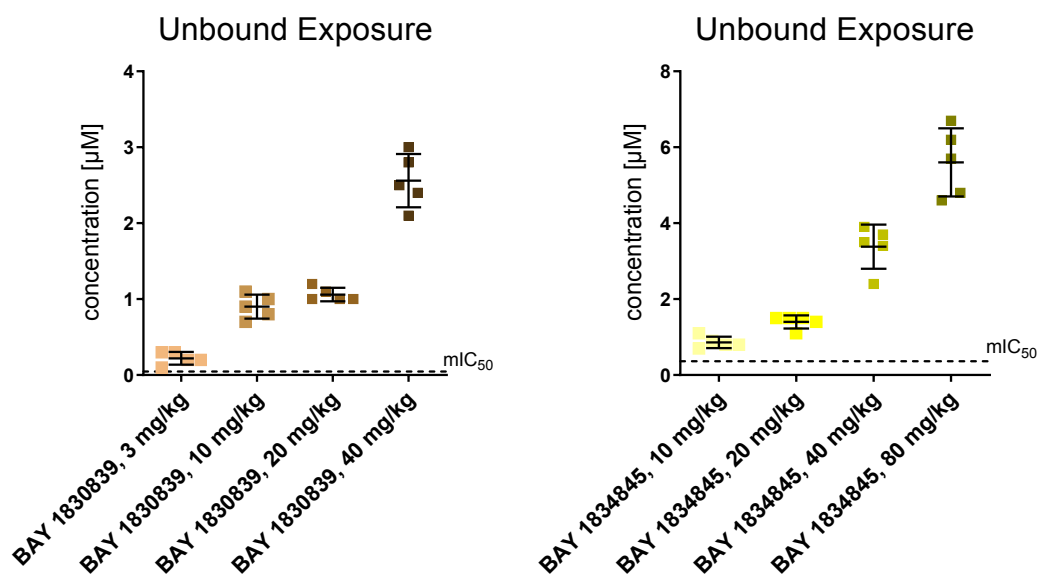

**Figure S1:** Unbound compound exposure data for **BAY1830839** (left graph) and **BAY1834845** (right graph) in IL-1-beta induced systemic inflammation model in mice. Blood samples were processed as described in the drug metabolism and pharmacokinetics (DMPK) part of the supplement, see section pharmacokinetics in mice. Mouse IC<sub>50</sub>: *in vitro* murine cellular IC<sub>50</sub>, which was determined according to the methods described in the section murine cellular potency.



## LPS (Lipopolysaccharides) induced systemic inflammation in mice

BALB/c mice (8 week old) were obtained from Janvier Labs, France and had access to food and water ad libitum. All animals were housed according to institutional guidelines under a 12 h/12 h light/dark cycle and maintained under standard conditions (20–22 °C, 50–70% humidity). Mice were divided into 5 animals per group. The test compound or its vehicle was orally administered 4 hours before a total of 0.2 mg of LPS /kg body weight (Sigma-Aldrich, Cat. No. L4391) was administered intraperitoneally. Animals were sacrificed 1.5 hours after injection of LPS. TNF-alpha and IL-6 were determined in the plasma after final removal of blood using the Mouse ProInflammatory 7-Plex Tissue Culture Kit (MSD, Cat. No. K15012B) in accordance with manufacturer's instructions.

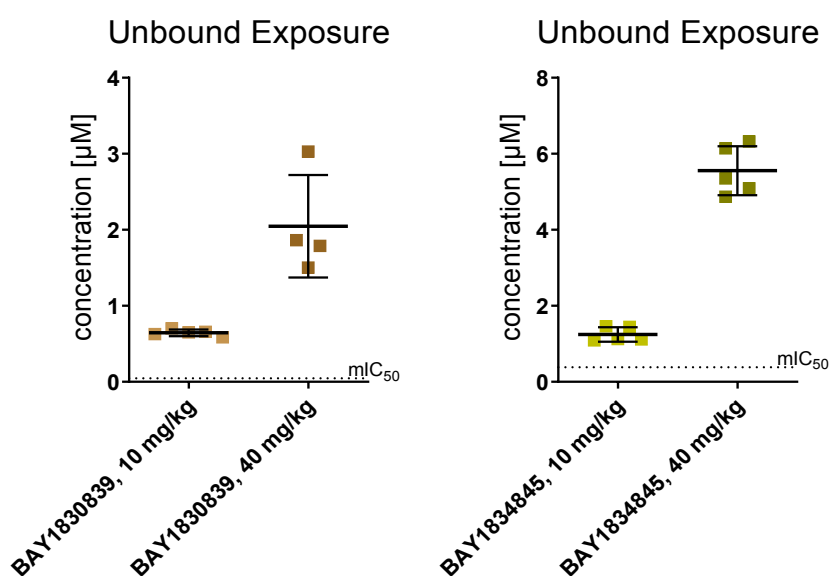

**Figure S2:** Unbound compound exposure data for **BAY1830839** (left graph) and **BAY1834845** (right graph) in LPS (Lipopolysaccharides) induced systemic inflammation model in mice. Blood samples were processed as described in the drug metabolism and pharmacokinetics (DMPK) part of the supplement, see section pharmacokinetics in mice. Mouse  $IC_{50}$ : *in vitro* murine cellular  $IC_{50}$ , which was determined according to the methods described in the section murine cellular potency.

## Imiquimod-induced topical inflammation in mice

BALB/c mice (9 to 10 weeks old) were obtained from Janvier Labs, France and had access to food and water ad libitum. All animals were housed according to institutional guidelines under a 12 h/12 h light/dark cycle and maintained under standard conditions (target:  $22 \pm 2$

°C, target: 50 ± 15% humidity). Mice were divided into 10 animals per group. For induction of the psoriasis-like inflammatory phenotype fur was removed at the back 1 day before and 3.5 mg of imiquimod (equivalent to 70 mg of Aldara© 5% crème, Meda AB) was daily topically administered for 7 consecutive days. The test compound or its vehicle was orally administered twice daily. Healthy control group was applied with paraffin oil instead of imiquimod. Every day, the disease scores were recorded from back skin (Table S5).

**Table S5. Disease scoring method for assessing back skin in mice.**

| Score | Erythema       | Scaling        | Skin thickness |
|-------|----------------|----------------|----------------|
| 0     | Normal         | Normal         | Normal         |
| 1     | Slight         | Slight         | Slight         |
| 2     | Moderate       | Moderate       | Moderate       |
| 3     | Important      | Important      | Important      |
| 4     | Very important | Very important | Very important |

X-ray crystallography

### **Expression and purification of IRAK4 for X-ray crystallography**

A synthetic gene fragment encoding IRAK4 amino acids F165-S460 with three mutants K400A/E401A/E402A was integrated into the baculovirus pVL1393 transfer vector behind a GST-Tag and a Thrombin cleavage site. The GST-fusion protein was expressed in SF9 insect cells infected with moi 1 for 48 h. The overall purification of intermediates was carried out at 4°C or on ice. Cells were resuspended in lysis buffer (50 mM Tris pH 8.0, 120 mM NaCl, 10% glycerol, 0,5%NP-40, 5 mM DTT) supplemented with cOmplete protease inhibitor cocktail (Roche Applied Science). The insoluble fraction was removed by centrifugation (150.000 g, 45 min). GST-tagged IRAK4 was captured on GST-Agarose 4B (GE Healthcare) by batch binding. GST resin was washed with buffer (50mM Tris pH 8.0, 60m M NaCl, 10% glycerol, 1 mM DTT). The IRAK4 protein was eluted by column cleavage over night with thrombin. Elution fractions were applied on a Resource 15Q (GE Healthcare) column and eluted by salt gradient (50mM Tris pH 8.0, 60 mM – 1 M NaCl, 10% glycerol, 1 mM DTT). Elution fractions

from the IEX were pooled and further purified by size-exclusion chromatography using a Superdex 75 26/60 column (GE Healthcare) pre-equilibrated with running buffer (50 mM HEPES pH 7.6, 250 mM NaCl, 10 % glycerol, 2 mM DTT). The monomeric peak fractions were pooled and concentrated with a 10-kDa Amicon Ultra-4 concentrator (Millipore) to 10 mg/mL and freshly used in crystallization experiments.

### **Crystallization and complex formation**

Two different crystallization routes were used to obtain co-complex structures:

a) Co-crystallization: Compound **38** and compound **5** were dissolved giving 100 mM DMSO stock solutions. Prior co-crystallization inhibitors were added to the protein to a final concentration of 2 mM. The complexes were incubated for 2 h on ice and crystallization was performed using vapor diffusion by hanging drop using equal volumes of protein solution and reservoir solution (0.1 M sodium acetate buffer at pH 4.9, 1.5 – 1.7 M ammonium citrate and 0.02 M hexaaminocobalt(III)chloride). Crystals of dimensions of 0.1 – 0.2 mm appeared within 1 – 3 days at 20 °C.

b) Back-soaking: An inhouse IRAK4 inhibitor was used as a tool to obtain suitable crystals for back-soaking experiments. The tool compound was diluted in DMSO to give a 100 mM stock solution. The tool compound was then added to the protein to a final concentration of 5 mM and the complex was incubated for 2 h on ice. Crystallization was performed using vapor diffusion in hanging drops using equal volumes of protein solution and reservoir solution (0.1 M sodium acetate buffer at pH 4.9 and 2.13 – 2.145 M sodium malonate). IRAK4 seeds were added to the final drop. Crystals with a size of ~0.1 – 0.3 mm grew after 1 – 3 days at 20 °C.

IRAK4 crystals were washed three times in reservoir solution overnight to wash out the tool compound. Compound **23**, compound **40**, and compound **16** were dissolved giving 100 mM DMSO stock solutions. DMSO stocks were diluted with reservoir solution to a final concentration of 5 mM of inhibitors. Crystals of IRAK4 were soaked for 3 – 4 days in this solution at 20 °C.

Crystals of IRAK4: compound **41** were grown using Proteros Biostructures.

### **Data collection and refinement for IRAK4 co-complex structures:**

Crystals were flash-frozen in liquid nitrogen in the mother liquor prior to data collection. All data was collected at different synchrotron sources. Data of compound **38** and compound **5** was collected at Hamburg P14, data for compound **23**, compound **40** and compound **16** was

collected at Bessy beamline 14.1. Data of compound **41** was collected at Swiss Light Source beamline PXII by Proteros Biostructures. All data were processed using XDS<sup>2</sup>. Table S6 contains data collection statistics.

The structures were determined via Molecular Replacement using Molrep<sup>3</sup> with protein coordinates from an inhouse structure as the search model. The structure of compound **41** was solved using a previously solved X-ray structure. Refinement was carried out using Refmac<sup>4</sup>, model fitting was completed using COOT.<sup>5</sup> The refinement topology parameter file for the inhibitors were generated using ProDrg<sup>6</sup> and were docked into the electron density within COOT. The models contain two IRAK4 molecules in the asymmetric unit, only **41** consists of four IRAK4 molecules in the asymmetric unit. The crystallographic data for the six structures have been deposited within the RCSB Protein Data Bank (PDB) with access codes 8ATB, 8ATL, 8ATN, 8BR5, 8BR6, 8BR7. Refinement statistics are shown in Table S6.

**Table S6. Data collection and refinement statistics.**

| Compound Number                                                          | 5                             | 16                            | 23                            | 38                            | 40                           | 41                                 |
|--------------------------------------------------------------------------|-------------------------------|-------------------------------|-------------------------------|-------------------------------|------------------------------|------------------------------------|
| PDB Id                                                                   | 8BR7                          | 8ATB                          | 8ATL                          | 8ATN                          | 8BR6                         | 8BR5                               |
| <b>Data collection and processing</b>                                    |                               |                               |                               |                               |                              |                                    |
| Wavelength [Å]                                                           | 0.9763                        | 0.9184                        | 0.9184                        | 0.9763                        | 0.9184                       | 1.000                              |
| Space group (no.)                                                        | I222                          | I222                          | I222                          | I222                          | I222                         | C2                                 |
| Unit cell parameters,<br><i>a</i> , <i>b</i> , <i>c</i> [Å], $\beta$ [°] | 87.258<br>117.97<br>139.86    | 87.200<br>117.500<br>136.600  | 87.864<br>118.789<br>138.136  | 88.117<br>118.798<br>140.363  | 87.725<br>18.573<br>138.709  | 143.21<br>141.20<br>87.92<br>124.5 |
| Resolution limit [Å]                                                     | 19.77 – 2.12<br>(2.25 – 2.12) | 48.89 – 2.34<br>(2.48 – 2.34) | 46.35 – 2.46<br>(2.60 – 2.46) | 49.88 – 2.17<br>(2.30 – 2.17) | 46.3 – 2.17<br>(2.30 – 2.17) | 90.58 – 2.70<br>(2.95 – 2.70)      |
| No. of reflections                                                       | 474480 (74103)                | 178315 (28830)                | 146185 (22131)                | 540629 (86294)                | 228440 (36772)               | 151292 (34200)                     |
| No. of unique reflections                                                | 35635 (5751)                  | 30087 (4796)                  | 26561 (4006)                  | 39306 (6285)                  | 38659 (6104)                 | 39488 (9173)                       |
| Multiplicity                                                             | 6.49 (6.20)                   | 5.92 (6.01)                   | 5.50 (5.52)                   | 13.75 (13.73)                 | 5.01 (6.02)                  | 4.42 (4.30)                        |
| $I/\sigma(I)$                                                            | 16.69 (1.66)                  | 16.25 (2.44)                  | 17.30 (3.60)                  | 13.77 (1.11)                  | 10.85 (1.71)                 | 16.80 (3.58)                       |
| $R_{\text{meas}}$ [%]                                                    | 11.5 (205.4)                  | 9.5 (83.0)                    | 7.4 (49.1)                    | 11.9 (244.9)                  | 13.8 (114.7)                 | 9.4 (52.3)                         |
| CC(1/2)                                                                  | 99.9 (70.1)                   | 99.9 (80.5)                   | 99.9 (92.6)                   | 99.9 (76.7)                   | 99.8 (65.1)                  | 99.8 (88.2)                        |
| Completeness [%]                                                         | 86.2 (87.8)                   | 99.8 (99.6)                   | 99.8 (100.0)                  | 99.9 (100)                    | 99.7 (98.6)                  | 99.3 (99.3)                        |
| <b>Refinement</b>                                                        |                               |                               |                               |                               |                              |                                    |
| $R_{\text{work}}/R_{\text{free}}$ [%]                                    | 23.87 / 28.79                 | 21.23/ 20.01                  | 19.88 / 24.29                 | 23.84 / 30.59                 | 21.33 / 25.13                | 21.46 / 25.41                      |
| RMSD bond length [Å]                                                     | 0.0035                        | 0.0021                        | 0.0026                        | 0.0136                        | 0.0028                       | 0.0035                             |
| RMSD bond angles [deg]                                                   | 1.239                         | 1.157                         | 1.274                         | 1.767                         | 1.220                        | 1.253                              |
| <i>B</i> factors [Å <sup>2</sup> ]                                       | 60.24                         | 55.62                         | 56.28                         | 77.04                         | 48.70                        | 57.76                              |
| Ramachandran favored (%)                                                 | 95.0                          | 95.8                          | 96.9                          | 93.0                          | 96.9                         | 96.2                               |
| Ramachandran allowed (%)                                                 | 4.4                           | 3.8                           | 3.1                           | 6.2                           | 2.6                          | 3.4                                |
| Ramachandran outliers (%)                                                | 0.6                           | 0.4                           | 0.0                           | 0.7                           | 0.5                          | 0.4                                |

Values in brackets refer to the highest resolution shell.

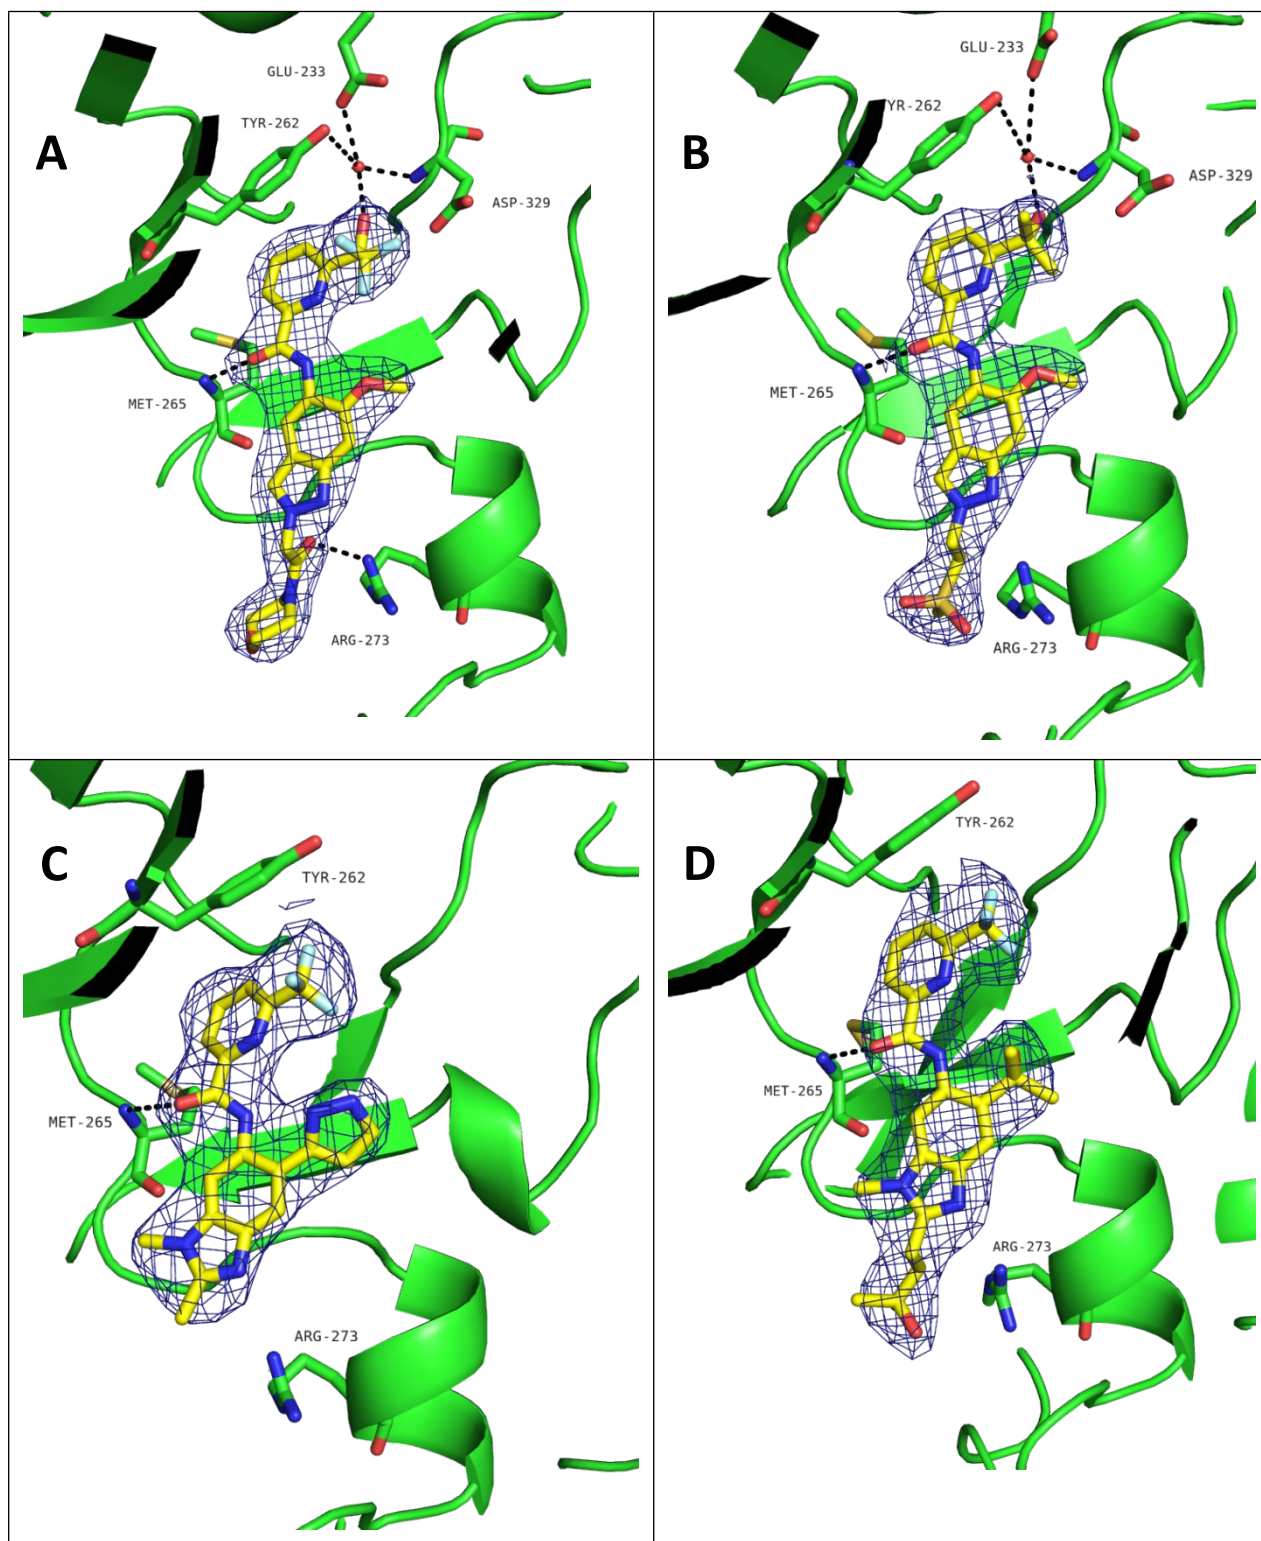

**Figure S3:** Cocystal structures of indazole-based compounds **23** (A) and **40** (B), as well as methyl-benzimidazole-based compounds **41** (C) and **38** (D) with the human IRAK4 kinase domain. The general binding mode of the series – the amide carbonyl oxygen atom engaging in a hydrogen bond with the hinge residue Met265 – was stable across the series and throughout the chemistry program (see also Figures 3 and 5). While no experimental binding

modes for the two clinical candidate molecules are available, all substructures contain local binding interactions that have been characterized through X-ray data.

### Computational studies

Modelling studies were performed using the Schrodinger Maestro Suite (versions 9.2 to 10.4). For docking, Glide<sup>7, 8</sup> (versions 5711 to 69017) was used, and protein structures were prepared using the protein preparation wizard with default parameters, with ligand protonation states being manually adapted as required. To ensure a comprehensive sampling of the space of docking solutions, GOLD<sup>9</sup> was employed as a second, algorithmically complementary docking tool, using the same protein input structures prepared within Maestro. The preparation of 3D ligand structures for docking employed an inhouse Pipeline Pilot<sup>10</sup> script that utilizes Corina<sup>11</sup> for 3D structure generation and SimPlus ADMET predictor<sup>12</sup> for the assignment of protonation states.

Matched molecular pairs were identified using an inhouse protocol based on Pipeline Pilot<sup>10</sup>.

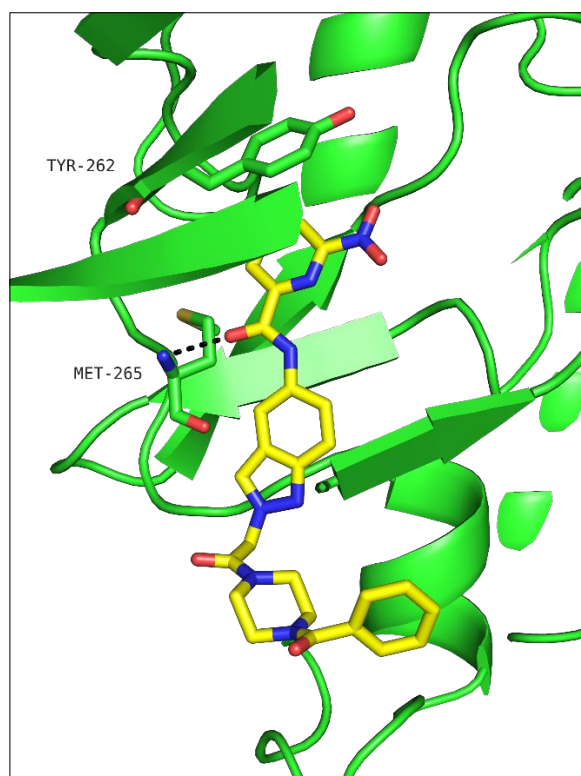

**Figure S4:** Orientation of the docking pose of compound **5** in the IRAK4 pocket of PDB 2NRU, A chain, qualitatively reproduced with current software (Glide SP as part of maestro version 13.7.125). The original 3D file is no longer available. The hypothesized binding mode involves a single hydrogen bond to the hinge region (Met265) and aromatic-aromatic interactions with the gatekeeper Tyr262.

Experimental section: synthetic chemistry

### General Methods and Materials

Commercially available reagents and anhydrous solvents were used as supplied without further purification. A Biotage Initiator Classic microwave reactor (Uppsala, Sweden) was used for reactions conducted in a microwave oven. Reactions were monitored by thin layer chromatography (TLC) and UPLC using either analytical method A (Instrument: Waters Acquity UPLCMS SingleQuad; Column: Acquity UPLC BEH C18 1.7  $\mu\text{m}$ , 50 mm x 2.1 mm; eluent A: water + 0.1 vol % formic acid (99%), eluent B: acetonitrile; gradient: 0–1.6 min 1–99% B, 1.6–2.0 min 99% B; flow 0.8 ml/min; temperature: 60 °C; DAD scan: 210–400 nm), analytical method B (Instrument: Waters Acquity UPLCMS SingleQuad; Column: Acquity UPLC BEH C18 1.7  $\mu\text{m}$ , 50 x 2.1mm; eluent A: water+0.2 vol % aqueous ammonia (32%), eluent B: acetonitrile; gradient: 0–1.6 min 1–99% B, 1.6–2.0 min 99% B; flow 0.8 ml/min; temperature: 60 °C; DAD scan: 210–400 nm), analytical method C (Instrument: Waters Acquity UPLCMS SingleQuad; Column: Acquity UPLC BEH C18 1.7 50mm x 2.1mm; eluent A: water +0.1 vol % formic acid (99%), eluent B: acetonitrile; gradient: 0–1.6 min 1–99% B, 1.6–2.0 min 99% B; flow 0.8 ml/min; temperature: 60 °C; DAD scan: 210–400 nm), or analytical method D (Instrument: Waters Acquity UPLCMS SingleQuad; Colum: Acquity UPLC BEH C18 1.7 50mm x 2.1mm; eluent A: water+0.2 vol % aqueous ammonia (32%), eluent B: acetonitrile; gradient: 0–1.6 min 1–99% B, 1.6–2.0 min 99% B; flow 0.8 ml/min; temperature: 60 °C; DAD scan: 210–400 nm). Analytical thin layer chromatography (TLC) was carried out on aluminum-backed plates coated with Merck Kieselgel 60 F254 (Merck KGaA, Darmstadt, Germany), with visualization under UV light at 254 nm. Flash chromatography was carried out using a Biotage Isolera One system with a 200–400 nm variable detector. Preparative HPLC was carried out with a Waters AutoPurification MS Single Quad system; column: Waters XBridge C18 5 $\mu\text{m}$ , 100 mm x 30 mm; basic conditions: eluent A, water+0.2 vol % aq NH<sub>3</sub> (32%); eluent B, MeCN; acidic conditions: eluent A: water+0.1 vol % formic acid, eluent B: MeCN; DAD scan, 210–400 nm. NMR spectra were recorded at rt (22  $\pm$  1 °C), unless otherwise noted, on Bruker Avance III HD spectrometers. <sup>1</sup>H NMR spectra were obtained at 300, 400, 500, or 600 MHz. <sup>1</sup>H NMR data are reported as follows: chemical shift ( $\delta$ ) in ppm, multiplicity (s = singlet, d = doublet, t = triplet, q =quartet, br = broad, m = multiplet), integration, and assignment. Low-resolution mass spectra (electrospray ionization, ESI) were obtained via HPLC-MS (ESI) using a Waters Acquity UPLC system equipped with an SQ 3100 mass detector. The purity of all target compounds



if not otherwise mentioned was at least 95%, as determined by UPLC-MS. Compound names were generated using ACD/name software.

### Abbreviations

br, broad; brine, saturated aqueous sodium chloride solution; CAS, Chemical Abstracts Service; DAD, diode array detector; DIPEA, *N,N*-diisopropylethylamine (Hünig's base); DMF, *N,N*-dimethylformamide; DMSO, dimethyl sulfoxide; EDC, 1-ethyl-3-(3-dimethylaminopropyl)carbodiimide hydrochloride; ELSD, evaporative light scattering detector; eq., equivalent; ESI(neg), electrospray ionization negative ion mode; ESI(pos), electrospray ionization positive ion mode; HATU, 1-[bis(dimethylamino)methylene]-1*H*-1,2,3-triazolo[4,5-*b*]pyridinium 3-oxid hexafluorophosphate; HCl, hydrochloric acid; HOBT, 1-hydroxybenzotriazole hydrate; NMR, nuclear magnetic resonance spectroscopy: chemical shifts ( $\delta$ ) are given in ppm. The chemical shifts were corrected by setting the DMSO signal to 2.50 ppm unless otherwise stated; sat., saturated; SQD, single-quadrupole-detector; TEA, triethylamine; UPLC, ultra-performance liquid chromatography.

## Synthesis of compound 6

### Intermediate 6-a

#### ***tert*-Butyl-1H-indazol-5-ylcarbamate**

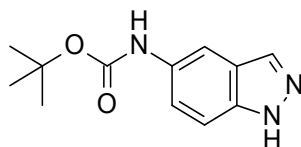

37 mL of DIPEA and 41.8 g (191.5 mmol) of di-*tert*-butyl dicarbonate were added to 25.5 g (192 mmol) of 1H-indazole-5-amine (CAS Number 19335-11-6) in 300 mL of THF and the mixture was stirred at 25°C for 24 h. The mixture was concentrated affording 44.6 g (95% yield) of the title compound.

MS (ESIpos):  $m/z = 234$  (M+H)<sup>+</sup>

<sup>1</sup>H NMR (DMSO-*d*<sub>6</sub>, 300 MHz)  $\delta$  1.44 (s, 9H), 7.24–7.46 (m, 2H), 7.84 (s, 1H), 7.92 (s, 1H), 9.24 (br. s., 1H), 12.86 (br. s., 1H).

### Intermediate 6-b

#### **Ethyl {5-[(*tert*-butoxycarbonyl)amino]-2H-indazol-2-yl}acetate**

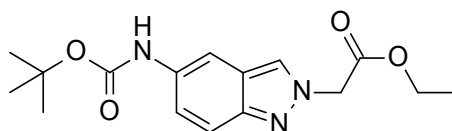

10.5 g (76.3 mmol) of potassium carbonate and 4.67 mL (42.0 mmol) of ethyl bromoacetate were added to 8.90 g (38.1 mmol) of *tert*-butyl 1H-indazol-5-ylcarbamate in 80 mL of DMF and the mixture was stirred at 80 °C for 24 h. The mixture was diluted with water and extracted with ethyl acetate, the organic phase was washed with water and brine, dried, and concentrated and the residue was purified by column chromatography on silica gel (hexane/ethyl acetate). This gave 2.4 g of the title compound as the main component as a mixture with *tert*-butyl 1H-indazol-5-ylcarbamate (starting material).

<sup>1</sup>H NMR (CHLOROFORM-*d*, 500 MHz, selected signals)  $\delta$  1.28 (t, 3H,  $J=7.2$  Hz), 4.25 (q, 2H,  $J=7.3$  Hz), 5.16 (s, 2H), 7.03 (dd, 1H,  $J=1.9, 9.2$  Hz), 7.62 (d, 1H,  $J=8.9$  Hz).

### Intermediate 6-c

#### **{5-[(*tert*-Butoxycarbonyl)amino]-2H-indazol-2-yl}acetic acid**

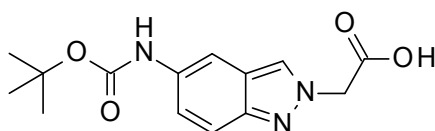

5.00 g (15.6 mmol) of ethyl {5-[(*tert*-butoxycarbonyl)amino]-2H-indazol-2-yl}acetate were dissolved in 50 mL of THF and 5 mL of ethanol. A solution of 6.57 g (15.6 mmol) of lithium hydroxide monohydrate in 20 mL of water was then added and the mixture was stirred at 25 °C for 24 h, diluted with water, and acidified to pH 4 by addition of aqueous hydrochloride solution (1M). The mixture was partly concentrated. The solid was filtered, washed with water and diethylether, and dried *in vacuo* to give 4.1 g (89% yield) of the title compound.

MS (ESIpos):  $m/z = 292$  (M+H)<sup>+</sup>

### **Intermediate 6-d**

#### ***tert*-Butyl {2-[2-(4-benzoylpiperazin-1-yl)-2-oxoethyl]-2H-indazol-5-yl}carbamate**

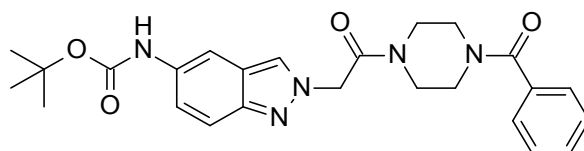

2.53 g (8.69 mmol) of {5-[(*tert*-butoxycarbonyl)amino]-2H-indazol-2-yl}acetic acid were stirred in 50 mL of THF and 1.33 g (8.69 mmol) of HOBT, 3.33 g (17.4 mmol) of EDC, and 3.6 mL (26 mmol) of TEA were added and the suspension was stirred at 25 °C overnight. The mixture was diluted with water and sat. aqueous sodium bicarbonate solution and concentrated until precipitation of a solid. The solid was filtered off, washed with water and ethyl acetate, and dried *in vacuo*.

MS (ESIpos):  $m/z = 464$  (M+H)<sup>+</sup>

<sup>1</sup>H NMR (DMSO-*d*<sub>6</sub>, 400 MHz)  $\delta$  1.45 (s, 9H), 3.30–3.78 (m, 8H), 5.41 (br. s., 2H), 7.18 (dd, 1H,  $J=1.9, 9.2$  Hz), 7.35–7.50 (m, 6H), 7.82 (br. s., 1H), 8.11 (s, 1H), 9.18 (s, 1H).

### **Intermediate 6-e**

#### **2-(5-Amino-2H-indazol-2-yl)-1-(4-benzoylpiperazin-1-yl)ethanone**

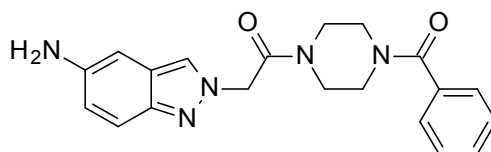

A mixture of 4.20 g (9.06 mmol) of *tert*-butyl {2-[2-(4-benzoylpiperazin-1-yl)-2-oxoethyl]-2H-indazol-5-yl}carbamate and 6.98 mL (90.6 mmol) of TFA in 50 mL DCM was stirred at rt overnight and carefully poured into an aqueous sat. sodium bicarbonate solution. The mixture was stirred and extracted with DCM three times. The combined organic layers were washed with brine, filtered with a water-repellent filter, and concentrated to give 3.27 g (99% yield) of the title compound.

MS (ESIpos):  $m/z = 364 (M+H)^+$

$^1\text{H NMR}$  (DMSO- $d_6$ , 300 MHz)  $\delta$  3.36–3.80 (m, 8H), 4.78 (s, 2H), 5.33 (br. s., 2H), 6.55 (d, 1H,  $J=1.3$  Hz), 6.74 (dd, 1H,  $J=2.1, 9.0$  Hz), 7.30 (d, 1H,  $J=9.0$  Hz), 7.38–7.53 (m, 5H), 7.81 (s, 1H).

### **Compound 6 (step 6-f)**

***N*{2-[2-(4-benzoylpiperazin-1-yl)-2-oxoethyl]-2H-indazol-5-yl}-6-(trifluoromethyl)pyridine-2-carboxamide**

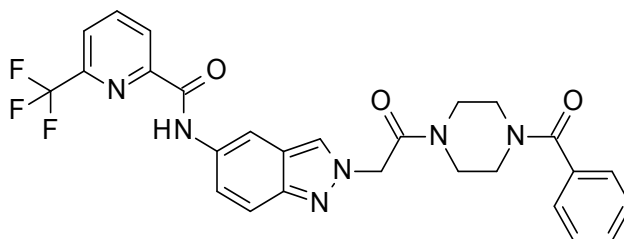

230 mg (1.21 mmol, 1.2 eq.) of 6-(trifluoromethyl)pyridine-2-carboxylic acid, 385 mg (2.01 mmol) of EDC, 154 mg (1.00 mmol) HOBt, and 0.42 mL of TEA were added to a mixture of 365 mg (1.00 mmol) of 2-(5-amino-2H-indazol-2-yl)-1-(4-benzoylpiperazin-1-yl)ethanone in THF (6 mL) and the mixture was stirred at rt overnight. Water was added and the mixture was partly concentrated. The solid was filtered off and washed three times with water and three times with diethylether and dried *in vacuo* to give 488 mg (91%) of the title compound.

LC-MS (method A):  $R_t = 1.09$  min; MS (ESIpos):  $m/z = 537 [M+H]^+$

$^1\text{H NMR}$  (DMSO- $d_6$ , 400 MHz)  $\delta$  3.43–3.71 (m, 7H), 5.49 (br s, 2H), 7.42–7.49 (m, 5H), 7.54–7.62 (m, 2H), 8.16 (dd, 1H,  $J=1.3, 7.6$  Hz), 8.29–8.41 (m, 4H), 10.36 (s, 1H).

### **Synthesis of compound 7**

#### **Intermediate 7-a**

### ***tert*-Butyl (6-methyl-1H-indazol-5-yl)carbamate**

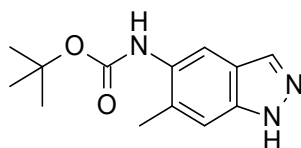

10.3 g (70.0 mmol) of 6-methyl-1H-indazole-5-amine (CAS Number 81115-45-9) was suspended in 150 mL of THF; 13.4 mL (80.0 mmol) of DIPEA was added and the mixture was cooled to 0 °C. After the addition of 5.52 g (25.3 mmol) of di-*tert*-butyl dicarbonate at 0 °C, the mixture was then stirred at 25 °C for 18 h. The mixture was concentrated, giving 17.6 g of a crude product which was used without purification.

MS (ESIpos):  $m/z = 248$  (M+H)<sup>+</sup>

### **Intermediate 7-b**

#### **Ethyl {5-[(*tert*-butoxycarbonyl)amino]-6-methyl-2H-indazol-2-yl}acetate**

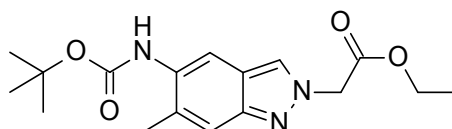

10.0 g (40.4 mmol) of *tert*-butyl (6-methyl-1H-indazol-5-yl)carbamate were stirred with 9.00 mL (80.9 mmol) of ethyl bromoacetate in 75 mL of THF in the presence of 17.1 mL (80.9 mmol) of *N,N*-dicyclohexylmethylamine at 70 °C for 24 h. The precipitate was filtered and washed twice with ethyl acetate. Water was added to the filtrate and the organic phase was separated and extracted twice with ethyl acetate. The combined organic phases were washed with 1 M HCl, sat. sodium bicarbonate solution, and brine and concentrated. The residue was purified using the Isolera<sup>®</sup> flash purification system (Biotage) (mobile phase: hexane/ethyl acetate). The combined product fractions were concentrated and dried. This gave 8.90 g (42% yield) of the title compound.

In a second experiment, 213 mg of the title compound were obtained analogously from 2.00 g of *tert*-butyl (6-methyl-1H-indazol-5-yl)carbamate using 2.24 g of potassium carbonate instead of *N,N*-dicyclohexylmethylamine at 80 °C in DMF, with two successive purifications on silica gel (hexane/ethyl acetate).

MS (ESIpos):  $m/z = 334$  (M+H)<sup>+</sup>

$^1\text{H}$  NMR (DMSO- $d_6$ , 600 MHz)  $\delta$  1.21 (t, 3H,  $J=7.2$  Hz), 1.46 (s, 9H), 2.28 (s, 3H), 4.16 (q, 2H,  $J=7.2$  Hz), 5.34 (s, 2H), 7.38 (d, 1H,  $J=0.8$  Hz), 7.57 (s, 1H), 8.25 (d, 1H,  $J=0.8$  Hz), 8.40 (s, 1H).

### Intermediate 7-c

#### **{5-[(*tert*-Butoxycarbonyl)amino]-6-methyl-2H-indazol-2-yl}acetic acid**

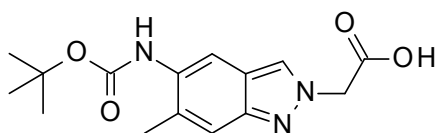

10.7 g (254 mmol) of lithium hydroxide monohydrate dissolved in 50 mL of water were added to 10.6 g (25.4 mmol, 80%) of ethyl {5-[(*tert*-butoxycarbonyl)amino]-6-methyl-2H-indazol-2-yl}acetate in 100 mL of THF and 10 mL of ethanol and the mixture was stirred. This resulted in the precipitation of a solid. After 18 h, the reaction mixture was diluted with water and acidified to pH 4 using aqueous HCl solution (2M) and the solid was filtered off, washed with water and diethylether, and dried. This gave 6.98 g (87% yield) of the title compound.

MS (ESIpos):  $m/z = 306$  (M+H) $^+$

$^1\text{H}$  NMR (DMSO- $d_6$ , 300 MHz)  $\delta$  1.44 (s, 9H), 2.25 (s, 3H), 4.78 (s, 2H), 7.32 (s, 1H), 7.49 (s, 1H), 8.10 (s, 1H), 8.35 (s, 1H).

### Intermediate 7-d

#### ***tert*-Butyl {2-[2-(4-benzoylpiperazin-1-yl)-2-oxoethyl]-6-methyl-2H-indazol-5-yl}carbamate**

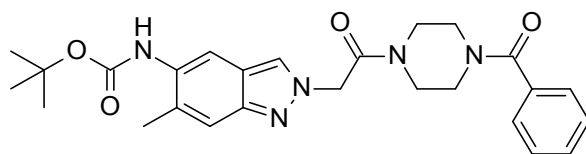

181 mg (0.59 mmol) of {5-[(*tert*-butoxycarbonyl)amino]-6-methyl-2H-indazol-2-yl}acetic acid and 169 mg (0.89 mmol) of phenyl(piperazin-1-yl)methanone were initially charged in 5 mL of THF and 0.5 mL of DMF. 91 mg (0.59 mmol) of HOBT, 227 mg (1.19 mmol) of EDC, and 0.25 mL (1.79 mmol) of TEA were added and the mixture was stirred at 25 °C for 18 h. The mixture was diluted with water and ethyl acetate and the precipitated solid was filtered off, washed with water and diethylether, and dried under reduced pressure. This resulted in 248 mg (85% yield) of the title compound.

MS (ESIpos):  $m/z = 478$  (M+H) $^+$

$^1\text{H}$  NMR (DMSO- $d_6$ , 400 MHz)  $\delta$  1.42 (s, 9H), 2.24 (s, 3H), 3.32–3.82 (m, 8H), 5.41 (br. s., 2H), 7.33 (s, 1H), 7.38–7.48 (m, 5H), 7.52 (s, 1H), 8.12–8.16 (m, 1H), 8.35 (s, 1H).

### Intermediate 7-e

#### **2-(5-Amino-6-methyl-2H-indazol-2-yl)-1-(4-benzoylpiperazin-1-yl)ethanone**

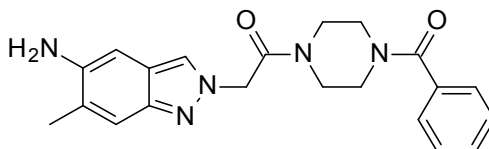

0.3 mL (3.89 mmol) of TFA was added to 247 mg (0.52 mmol) of *tert*-butyl {2-[2-(4-benzoylpiperazin-1-yl)-2-oxoethyl]-6-methyl-2H-indazol-5-yl}carbamate in 5 mL of DCM and the mixture was stirred at 25 °C for 18 h. Another 0.3 mL (3.89 mmol) of TFA was then added and the mixture was stirred for 18 h, poured into sat. sodium bicarbonate solution and extracted three times with DCM. The mixture was concentrated resulting in 223 mg of the title compound as a crude product.

MS (ESIpos):  $m/z$  = 378 (M+H) $^+$

$^1\text{H}$  NMR (DMSO- $d_6$ , 400 MHz)  $\delta$  2.15 (s, 3H), 3.29–3.75 (m, 8H), 4.53 (s, 2H), 5.28 (br. s., 2H), 6.63 (s, 1H), 7.17 (s, 1H), 7.37–7.47 (m, 5H), 7.75–7.79 (m, 1H).

### Compound 7 (step 7-f)

#### **N-{2-[2-(4-Benzoylpiperazin-1-yl)-2-oxoethyl]-6-methyl-2H-indazol-5-yl}-6-(trifluoromethyl)pyridine-2-carboxamide**

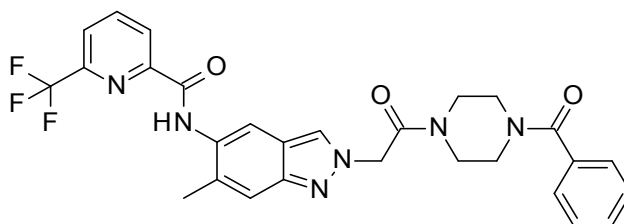

44 mg (0.29 mmol) of HOBt, 11 mg (0.58 mmol, 2 eq.) of EDC and 0.12 mL (3 eq.) of TEA were added to 109 mg (0.29 mmol) 2-(5-amino-6-methyl-2H-indazol-2-yl)-1-(4-benzoylpiperazin-1-yl)ethanone and 83 mg 6-(trifluoromethyl)pyridine-2-carboxylic acid in 2.5 mL THF and 0.5 mL DMF and the mixture was stirred at rt overnight. Water and ethyl acetate were added, and the resulting suspension was filtered; the solid was washed with water and diethylether and dried *in vacuo* affording 108 mg (0.20 mmol, 68% yield) of the title compound.

LC-MS (method A): Rt = 1.16 min; MS (ESIpos): m/z = 551 [M+H]<sup>+</sup>

<sup>1</sup>H NMR (DMSO-d<sub>6</sub>, 400 MHz) δ 2.38 (s, 3H), 3.32–3.77 (8H), 5.45 (br. s., 2H), 7.39–7.49 (m, 6H), 8.15–8.21 (m, 2H), 8.24 (s, 1H), 8.33–8.43 (m, 2H), 10.11 (s, 1H).

## Synthesis of compound 8

### Intermediate 8-a

#### ***tert*-Butyl (6-fluoro-1H-indazol-5-yl)carbamate**

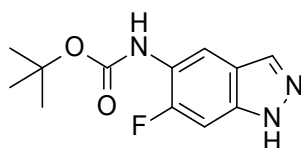

Similar to the synthesis of compound 7 (intermediate 7-a), 4.96 g (32.8 mmol) of 6-fluoro-1H-indazole-5-amine (CAS Number 709046-14-0), 7.16 g (32.8 mmol) of di-*tert*-butyl dicarbonate and 6.28 mL (36 mmol) of DIPEA were dissolved in 51 mL of THF and stirred at 25 °C for 20 h. This gave 5.72 g (69% yield) of the title compound.

MS (ESIpos): m/z = 252 (M+H)<sup>+</sup>

<sup>1</sup>H NMR (DMSO-d<sub>6</sub>, 300 MHz) δ 1.45 (s, 9H), 7.34 (d, 1H, *J*=10.5 Hz), 7.81 (m, 1H), 8.03 (s, 1H), 8.80 (s, 1H), 13.08 (s, 1H).

### Intermediate 8-b

#### **Ethyl {5-[(*tert*-butoxycarbonyl)amino]-6-fluoro-2H-indazol-2-yl}acetate**

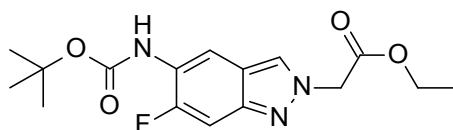

5.44 g (21.6 mmol) of *tert*-butyl (6-fluoro-1H-indazol-5-yl)carbamate, 4.80 mL (43.3 mmol) of ethyl bromoacetate, and 9.18 mL (43.3 mmol) of *N,N*-dicyclohexylmethylamine in 30 mL of THF were stirred for 24 h. Then, an additional 0.96 mL (8.6 mmol) of ethyl bromoacetate and 1.84 mL (8.6 mmol) of *N,N*-dicyclohexylmethylamine were added twice, once after 24 h and again after 48 h. The mixture was concentrated, taken up in DCM, washed with water, dried, and concentrated. Purification by column chromatography using the Isolera<sup>®</sup> flash purification system (Biotage) (mobile phase: hexane/DCM/ethyl acetate) gave 3.75 g (47% yield) of the title compound.



MS (ESIpos):  $m/z = 338 (M+H)^+$

$^1\text{H NMR}$  (DMSO- $d_6$ , 300 MHz)  $\delta$  1.20 (t, 3H,  $J=7.2$  Hz), 1.46 (s, 9H), 4.17 (q, 2H,  $J=7.2$  Hz), 5.36 (s, 2H), 7.37 (d, 1H), 7.84 (d, 1H), 8.36 (s, 1H), 8.80 (s, 1H).

### **Intermediate 8-c**

#### **Ethyl (5-amino-6-fluoro-2H-indazol-2-yl)acetate**

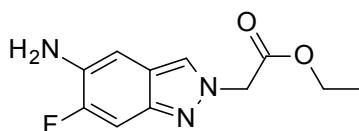

Similar to the preparation of compound 7 (Intermediate 7-e), 1.1 g (3.3 mmol) of ethyl {5-[(*tert*-butoxycarbonyl)amino]-6-fluoro-2H-indazol-2-yl}acetate were reacted with 1.92 mL (24.9 mmol) of TFA in 11 mL of DCM. Work-up gave 790 mg (100% yield) of the title compound.

MS (ESIpos):  $m/z = 238 (M+H)^+$

$^1\text{H NMR}$  (DMSO- $d_6$ , 300 MHz)  $\delta$  7.99 (d, 1H,  $J=0.8$  Hz), 7.22 (s, 1H), 7.18 (s, 1H), 6.80 (d, 1H,  $J=8.9$  Hz), 5.23 (s, 2H), 4.92 (s, 2H), 4.15 (q, 2H,  $J=7.2$  Hz), 1.20 (t, 3H,  $J=7.2$  Hz)

### **Intermediate 8-d**

#### **Ethyl [6-fluoro-5-({[6-(trifluoromethyl)pyridine-2-yl]carbonyl}amino)-2H-indazol-2-yl]acetate**

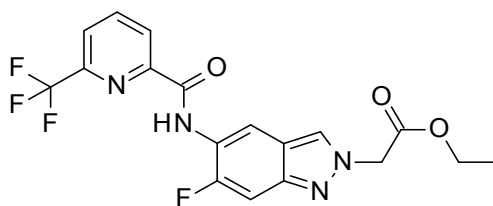

221 mg (1.16 mmol) of 6-(trifluoromethyl)pyridine-2-carboxylic acid, 177 mg (1.16 mmol) of HOBt, and 444 mg (2.32 mmol) of EDC in 5.5 mL of DMF were stirred at 25 °C for 30 min. 250 mg (1.05 mmol) of ethyl (5-amino-6-fluoro-2H-indazol-2-yl)acetate were added and the mixture was stirred at 25 °C for 30 min. The mixture was poured into 150 mL of water, filtered off with suction, washed with water, and dried, producing 366 mg (84% yield) of the title compound.

MS (ESIpos):  $m/z = 411 (M+H)^+$

$^1\text{H NMR}$  (DMSO- $d_6$ , 300 MHz)  $\delta$  1.22 (t, 3H,  $J=7.1$  Hz), 4.18 (q, 2H,  $J=7.2$  Hz), 5.41 (s, 2H), 7.55 (d, 1H,  $J=11.6$  Hz), 8.21 (m, 1H), 8.36–8.51 (m, 4H), 10.27 (m, 1H).

### Intermediate 8-e

#### **[6-Fluoro-5-({[6-(trifluoromethyl)pyridin-2-yl]carbonyl}amino)-2H-indazol-2-yl]acetic acid**

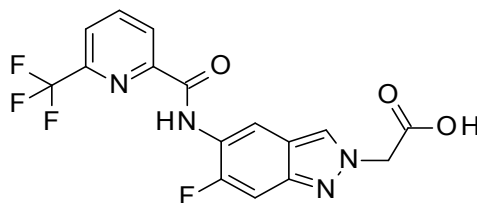

381 mg (0.93 mmol) of ethyl [6-fluoro-5-({[6-(trifluoromethyl)pyridin-2-yl]carbonyl}amino)-2H-indazol-2-yl]acetate were suspended in 9.2 mL of THF and 0.45 mL of ethanol and a solution of 222 mg (9.3 mmol) of lithium hydroxide in 2.3 mL of water was then added. The mixture was stirred at 25 °C for 30 min and then acidified to pH 2 with ice cooling using 2N HCl. 10 mL of water were added, and the precipitate was filtered off with suction. This resulted in 332 mg (93% yield) of the title compound.

MS (ESIpos):  $m/z = 383$  (M+H)<sup>+</sup>

<sup>1</sup>H NMR (DMSO-d<sub>6</sub>, 300 MHz)  $\delta$  5.30 (s, 2H), 7.55 (d, 1H), 8.22 (m, 1H), 8.34–8.54 (m, 4H), 10.26 (m, 1H), 13.30 (s br, 1H).

### Compound 8 (step 8-f)

#### **N-{2-[2-(4-Benzoylpiperazin-1-yl)-2-oxoethyl]-6-fluoro-2H-indazol-5-yl}-6-(trifluoromethyl)pyridine-2-carboxamide**

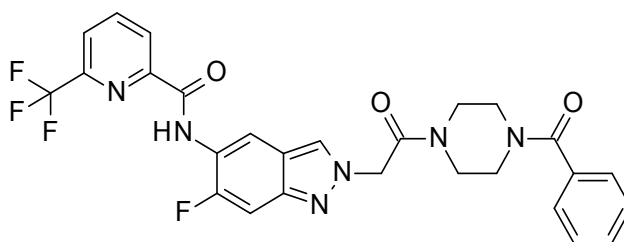

32 mg (0.21 mmol) of HOBt and 80 mg (0.42 mmol, 2 eq.) of EDC were added to 80 mg (0.21 mmol) of [6-fluoro-5-({[6-(trifluoromethyl)pyridin-2-yl]carbonyl}amino)-2H-indazol-2-yl]acetic acid in 3 mL THF and 330  $\mu$ l DMF. After stirring for 30 min at rt, 60 mg (0.31 mmol) of phenyl(piperazin-1-yl)methanone were added and the mixture was stirred for 30 min at rt and poured into 50 mL water. The resulting solid was filtered off using suction, washed with water, and dried to provide 109 mg (94 yield) of the title compound.

LC-MS (method A):  $R_t = 1.15$  min; MS (ESIpos):  $m/z = 555$  [M+H]<sup>+</sup>

$^1\text{H}$  NMR (DMSO- $d_6$ , 300 MHz)  $\delta$  3.38–3.75 (m, 8H), 5.51 (s, 2H), 7.40–7.56 (m, 6H), 8.19–8.26 (m, 1H), 8.35–8.49 (m, 4H), 10.24 (m, 1H).

## Synthesis of compound 9

### Intermediate 9-a

#### *tert*-Butyl 5-amino-6-chloro-1H-indazole-1-carboxylate

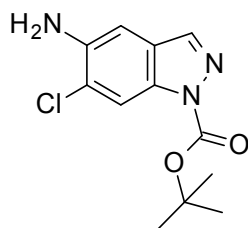

2.1 mL (11.8 mmol) of DIPEA and 2.34 g (10.7 mmol) of di-*tert*-butyl dicarbonate were added to 1.80 g (10.7 mmol) of 6-chloro-1H-indazole-5-amine (CAS Number 221681-75-0) in 18 mL of THF and the mixture was stirred at 25 °C for 18 h. The mixture was concentrated, and the residue was taken up in ethyl acetate and, during concentration, adsorbed on ISOLUTE. The ISOLUTE was applied to a Biotage SNAP cartridge (100 g; KP-Sil) that was pre-equilibrated with hexane and chromatography was carried out using the Isolera<sup>®</sup> flash purification system (Biotage) (mobile phase: hexane/ethyl acetate; flow rate: 50 ml/min; gradient: isocratic 100:0 [5 min], 100:0->75:25 [20 min], isocratic 75:25 [5min], 75:25->50:50 [15 min], isocratic 50:50 [5 min], 50:50->0:100 [15 min]). The combined product fractions were concentrated and dried under reduced pressure affording 1.23 g (43% yield) of the title compound.

MS (ESIpos):  $m/z$  = 268 (M+H)<sup>+</sup>

### Intermediate 9-b

#### *tert*-Butyl 6-chloro-5-({[6-(trifluoromethyl)pyridin-2-yl]carbonyl}amino)-1H-indazole-1-carboxylate

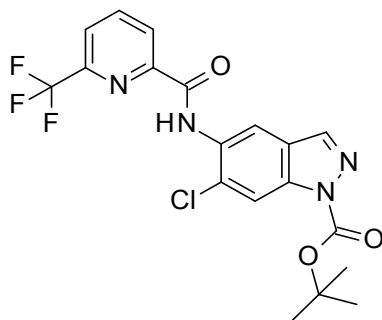

1.14 g (5.97 mmol) of 6-(trifluoromethyl)pyridine-2-carboxylic acid, 704 mg (4.59 mmol) HOBt, 1.76 g (8.19 mmol, 2 eq.) EDC and 1.9 mL (3 eq.) TEA were added to a solution of 1.23 g (4.59 mmol) of *tert*-butyl 5-amino-6-chloro-1H-indazole-1-carboxylate in 20 mL of DMF. After stirring at rt, 0.5 eq. 6-(trifluoromethyl)pyridine-2-carboxylic acid and 0.5 eq. HOBt were added a second time and the mixture was stirred for 3 days. Water was added, the mixture was stirred for 15 min, and the solid was filtered off with suction, washed three times with water, and dried under reduced pressure affording 2.02 g (98% yield) of the title compound.

MS (ESIpos):  $m/z = 441$  (M+H)<sup>+</sup>

<sup>1</sup>H NMR (DMSO-*d*<sub>6</sub>, 300 MHz)  $\delta$  1.65 (s, 9H), 8.19–8.27 (m, 2H), 8.37–8.53 (m, 3H), 8.75 (s, 1H), 10.59 (s, 1H).

### **Intermediate 9-c**

#### **N-(6-Chloro-1H-indazol-5-yl)-6-(trifluoromethyl)pyridine-2-carboxamide**

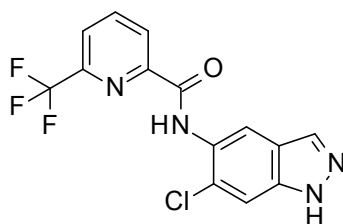

6.7 mL (87.3 mmol, 10 eq.) of TFA were added to 3.85 g (8.73 mmol) of *tert*-butyl 6-chloro-5-({[6-(trifluoromethyl)pyridine-2-yl]carbonyl}amino)-1H-indazole-1-carboxylate in 40 mL of DCM, and the mixture was stirred at rt for 18 h. After the addition of sat. aqueous sodium bicarbonate solution, the resulting solid was filtered with suction, washed with water and diethylether and dried to afford 2.98 g (100% yield) of the title compound.

MS (ESIpos):  $m/z = 341$  (M+H)<sup>+</sup>

<sup>1</sup>H NMR (DMSO-*d*<sub>6</sub>, 300 MHz)  $\delta$  7.83 (s, 1H), 8.14–8.27 (m, 2H), 8.36–8.49 (m, 2H), 8.60 (s, 1H), 10.50 (br. S., 1H), 13.25 (br. S., 1H).

### Intermediate 9-d

#### ***tert*-Butyl [6-chloro-5-({[6-(trifluoromethyl)pyridine-2-yl]carbonyl}amino)-2H-indazol-2-yl]acetate**

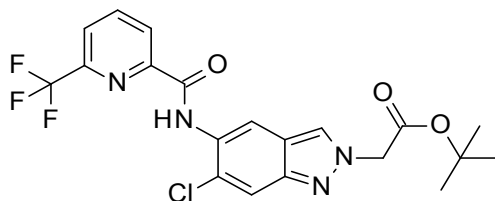

4.48 g (12.2 mmol) of *N*-(6-chloro-1H-indazol-5-yl)-6-(trifluoromethyl)pyridine-2-carboxamide were initially charged in 40 mL of THF. 3.61 mL (24.5 mmol) of *tert*-butyl bromoacetate and 5.19 mL (24.5 mmol) of *N,N*-dicyclohexylmethylamine were added. The mixture was stirred at 70 °C for 5.5 h. Another 3.61 mL (24.5 mmol) of *tert*-butyl bromoacetate and 5.19 mL (24.5 mmol) of *N,N*-dicyclohexylmethylamine were added and the mixture was stirred at 65 °C for 18 h. Then another 1.81 mL (12.3 mmol) of *tert*-butyl bromoacetate and 2.60 mL (12.3 mmol) of *N,N*-dicyclohexylmethylamine were added, and the mixture was stirred at 65 °C for 6 h. The mixture was filtered, water was added to the filtrate, the mixture was extracted three times with ethyl acetate, and the combined organic phases were washed with 1M HCl, sat. sodium bicarbonate solution, and brine and concentrated. Trituration of the crude product with ethyl acetate gave, after drying, 1.45 g (26% yield) of the title compound.

MS (ESIpos):  $m/z = 455$  (M+H)<sup>+</sup>

### Intermediate 9-e

#### **[[6-Chloro-5-({[6-(trifluoromethyl)pyridin-2-yl]carbonyl}amino)-2H-indazol-2-yl]acetic acid**

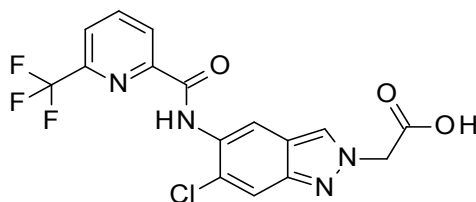

1.45 g (3.19 mmol) of *tert*-butyl [6-chloro-5-({[6-(trifluoromethyl)pyridin-2-yl]carbonyl}amino)-2H-indazol-2-yl]acetate were dissolved in 15 mL of DCM and 2.46 mL (31.9 mmol) of TFA were added at 25 °C. The solution was stirred at 25 °C for 18 h. Water was added, the resulting precipitate was filtered off with suction, washed three times with water and twice

with diethylether, and the solid was dried under reduced pressure. This gave 1.28 g (98% yield) of the title compound.

MS (ESIpos):  $m/z = 399$  (M+H)<sup>+</sup>

<sup>1</sup>H NMR (DMSO-d<sub>6</sub>, 400 MHz)  $\delta$  5.31 (s, 2H), 7.93 (s, 1H), 8.22 (dd, 1H,  $J=1.0, 7.6$  Hz), 8.40 (t, 1H,  $J=7.7$  Hz), 8.46 (d, 1H,  $J=7.7$  Hz), 8.49 (d, 1H,  $J=0.8$  Hz), 8.64 (s, 1H), 10.52 (s, 1H), 13.28 (br s, 1H).

### **Compound 9 (step 9-f)**

#### **N-{2-[2-(4-Benzoylpiperazin-1-yl)-2-oxoethyl]-6-chloro-2H-indazol-5-yl}-6-(trifluoromethyl)pyridine-2-carboxamide**

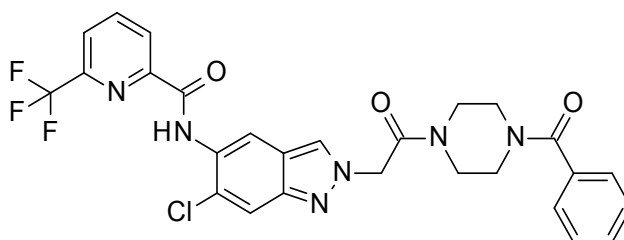

147 mg (0.77 mmol, 1.3 eq.) of phenyl(piperazin-1-yl)methanone, 91 mg (0.59 mmol) of HOBt, 228 mg (1.19 mmol, 2 eq.) of EDC and 0.25 mL of TEA (3.0 eq.) were added to 236 mg (0.59 mmol) of ([6-chloro-5-({[6-(trifluoromethyl)pyridin-2-yl]carbonyl}amino)-2H-indazol-2-yl]acetic acid in 4 mL THF. After stirring at rt overnight, water was added and the resulting solid was filtered with suction, washed with water and diethylether, and dried to afford 321 mg (95% yield) of the title compound.

LC-MS (method A):  $R_t = 1.22$  min; MS (ESIpos):  $m/z = 571$  [M+H]<sup>+</sup>

<sup>1</sup>H NMR (DMSO-d<sub>6</sub>, 300 MHz)  $\delta$  3.5–3.7 (m, 8H), 5.54 (br s, 2H), 7.4–7.5 (m, 5H), 7.91 (s, 1H), 8.23 (dd, 1H,  $J=1.1, 7.5$  Hz), 8.4–8.5 (m, 3H), 8.64 (s, 1H), 10.53 (s, 1H).

### **Synthesis of compound 10**

#### **Intermediate 10-a**

N-(6-Ethoxy-1H-indazol-5-yl)-6-(trifluoromethyl)pyridine-2-carboxamide

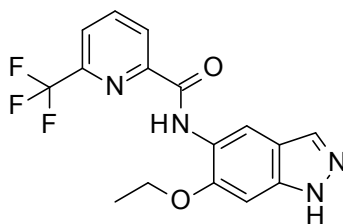

1.00 g (5.64 mmol) of 6-ethoxy-1H-indazole-5-amine and 1.29 g (6.77 mmol) of 6-(trifluoromethyl)pyridine-2-carboxylic acid were reacted with 864 mg (5.64 mmol) HOBt, 2.16 g (11.3 mmol, 2 eq.) EDC, and 2.4 mL (3.0 eq.) TEA in 50 mL of THF at rt overnight. After addition of water, the mixture was extracted three times with ethyl acetate and the combined organic layers were washed with brine, filtered through a water-repellent filter, and concentrated. Purification by column chromatography using the Isolera<sup>®</sup> flash purification system (eluent hexane/ethyl acetate) gave 1.30 g (64% yield) of the title compound.

MS (ESIpos):  $m/z = 351$  (M+H)<sup>+</sup>

<sup>1</sup>H NMR (DMSO-*d*<sub>6</sub>, 500 MHz)  $\delta$  1.51 (t, 3H,  $J=6.8$  Hz), 4.24 (q, 2H,  $J=6.8$  Hz), 7.10 (s, 1H), 8.00 (s, 1H), 8.20 (dd, 1H,  $J=0.8, 7.8$  Hz), 8.41 (t, 1H,  $J=7.8$  Hz), 8.47 (d, 1H,  $J=7.6$  Hz), 8.79 (s, 1H), 10.67 (s, 1H), 12.87 (s, 1H).

### **Intermediate 10-b**

#### **Ethyl [6-ethoxy-5-({[6-(trifluoromethyl)pyridin-2-yl]carbonyl}amino)-2H-indazol-2-yl]acetate**

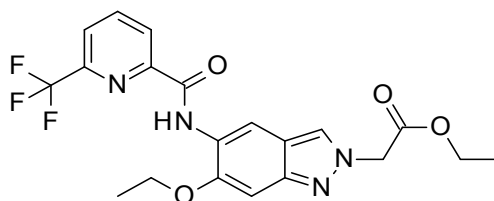

1.30 g (3.71 mmol) of *N*-(6-ethoxy-1H-indazol-5-yl)-6-(trifluoromethyl)pyridine-2-carboxamide, 826  $\mu$ l (7.42 mmol) of ethyl bromoacetate, and 1.54 mL (7.42 mmol) of *N,N*-dicyclohexylmethylamine in 20 mL of THF were stirred at 65 °C for 18 h. 413  $\mu$ l (3.71 mmol) of ethyl bromoacetate and 770  $\mu$ l (3.71 mmol) of *N,N*-dicyclohexylmethylamine were added and the mixture was stirred at 65 °C for 6 h. The resulting solid was filtered and washed with ethyl acetate twice. The solid was then transferred to a mixture of water and ethyl acetate and the organic layer was separated. The aqueous layer was extracted with ethyl acetate and the combined organic layers were washed with brine, filtered with a water-repellent filter, and dried, affording 143 mg of the title compound (crude batch). A further 637 mg of the title

compound were obtained after the addition of water to the reaction filtrate; extraction with ethyl acetate; washing the organic phase with 1M HCl, sat. sodium bicarbonate solution, and brine; drying, concentration; and trituration of the residue with ethyl acetate.

MS (ESIpos):  $m/z = 437$  (M+H)<sup>+</sup>

<sup>1</sup>H NMR (DMSO-d<sub>6</sub>, 400 MHz)  $\delta$  1.23 (t, 3H,  $J=7.0$  Hz), 1.51 (t, 3H,  $J=6.9$  Hz), 4.14–4.27 (m, 4H), 5.31 (s, 2H), 7.10 (s, 1H), 8.18–8.23 (m, 1H), 8.31 (s, 1H), 8.37–8.44 (m, 1H), 8.45–8.49 (m, 1H), 8.73 (s, 1H), 10.74 (s, 1H).

### **Intermediate 10-c**

#### **[6-Ethoxy-5-({[6-(trifluoromethyl)pyridin-2-yl]carbonyl}amino)-2H-indazol-2-yl]acetic acid**

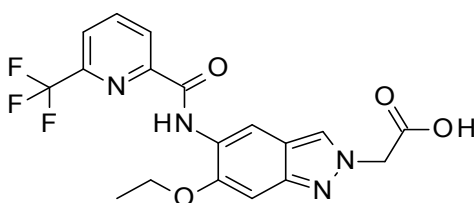

A solution of 745 mg (17.74 mmol) of lithium hydroxide monohydrate dissolved in 5 mL of water was added to 774 mg (1.77 mmol) of ethyl {[6-ethoxy-5-({[6-(trifluoromethyl)pyridin-2-yl]carbonyl}amino)-2H-indazol-2-yl]acetate in 1 mL of ethanol and 25 mL of THF, and the mixture was stirred at 25 °C for 3 days. After the addition of water, the mixture was acidified to pH 4 by adding aqueous citric acid solution (10%). The solid was filtered, washed with water and diethylether, and dried affording 698 mg (94% yield) of the title compound.

MS (ESIpos):  $m/z = 409$  (M+H)<sup>+</sup>

<sup>1</sup>H NMR (DMSO-d<sub>6</sub>, 300 MHz)  $\delta$  1.49 (t, 3H,  $J=7.0$  Hz), 4.20 (q, 2H,  $J=7.0$  Hz), 5.17 (s, 2H), 7.09 (s, 1H), 8.21 (dd, 1H,  $J=1.1, 7.5$  Hz), 8.28 (s, 1H), 8.36–8.48 (m, 2H), 8.71 (s, 1H), 10.73 (s, 1H).

### **Compound 10 (step 10-d)**

#### **N-{2-[2-(4-Benzoylpiperazin-1-yl)-2-oxoethyl]-6-ethoxy-2H-indazol-5-yl}-6-(trifluoromethyl)pyridine-2-carboxamide**



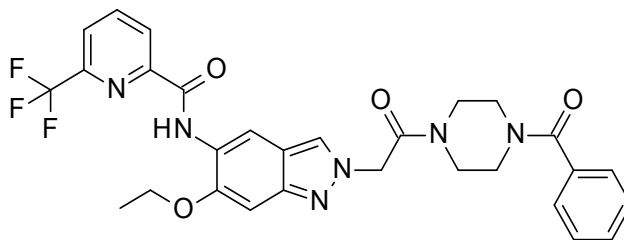

38 mg (0.25 mmol, 1.0 eq.) of HOBt, 94 mg (0.49 mmol, 2.0 eq.) of EDC and 0.10 mL (3.0 eq.) of TEA were added to a mixture of 100 mg (0.25 mmol) of [6-ethoxy-5-({[6-(trifluoromethyl)pyridin-2-yl]carbonyl}amino)-2H-indazol-2-yl]acetic acid and 61 mg (0.32 mmol, 1.3 eq.) of phenyl(piperazin-1-yl)methanone in 4 mL THF. After stirring at rt overnight, water was added and the resulting solid was filtered, washed with water and diethylether and dried, affording 101 mg (0.17 mmol, 71% yield) of the title compound.

LC-MS (method A): Rt = 1.23 min; MS (ESIpos): m/z = 581 [M+H]<sup>+</sup>

<sup>1</sup>H NMR (DMSO-d<sub>6</sub>, 400 MHz) δ 1.49 (t, 3H, J=6.9 Hz), 3.33–3.79 (m, 8H), 4.20 (q, 2H, J=6.8 Hz), 5.41 (br. s., 2H), 7.08 (s, 1H), 7.41–7.50 (m, 5H), 8.19–8.24 (m, 2H), 8.37–8.47 (m, 2H), 8.72 (s, 1H), 10.7 (s, 1H).

## Synthesis of compound 11

### Intermediate 11-a

#### 6-Isopropoxy-1H-indazole-5-amine

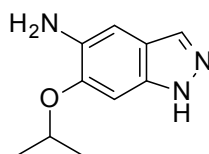

10 g (45.2 mmol) of 6-isopropoxy-5-nitro-1H-indazole (CAS Number 1082041-56-2) were dissolved in 200 mL of ethanol and hydrogenated with 1.20 g (1.13 mmol) of palladium on activated carbon under standard hydrogen pressure at 25 °C for 24 h. The reaction mixture was filtered through Celite®, the filter cake was washed with ethanol, and the filtrate was concentrated. Ethanol was added and after treatment with ultrasound, diethylether was added and the residue was digested further in the ultrasonic bath. The solid was filtered off with suction and washed with a little diethylether and hexane, giving 4.69 g (54%) of product. The filtrate was concentrated and applied to a Biotage SNAP cartridge (100 g; KP-Sil) pre-equilibrated with hexane and chromatography was carried out using the Isolera® flash

purification system (Biotage) (mobile phase: hexane/ethyl acetate; gradient: 90:10->35:65). The combined product fractions were concentrated and the residue was treated with ultrasound in a mixture of hexane and DCM (2:1) in an ultrasonic bath. The solid formed was filtered off. This gave an additional 2.36 g (27% yield) of the title compound.

MS (ESIpos):  $m/z = 192$  (M+H)<sup>+</sup>

<sup>1</sup>H NMR (DMSO-d<sub>6</sub>, 400 MHz)  $\delta$  1.31 (s, 3 H), 1.33 (s, 3 H), 4.43 (s, 2 H), 4.57–4.68 (m, 1 H), 6.81 (s, 1 H), 6.83 (s, 1 H), 7.64 (s, 1 H), 12.34 (br. S., 1 H).

The next steps for the synthesis of compound **11** were performed similarly to the methods described for the preparation of compounds **7** and **8**:

### **Intermediate 11-b**

#### ***tert*-Butyl (6-isopropoxy-1H-indazol-5-yl)carbamate**

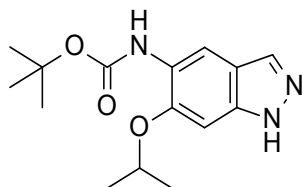

2.2 g (11.6 mmol) of 6-isopropoxy-1H-indazole-5-amine was reacted with 2.52 g (11.6 mmol) of di-*tert*-butyl dicarbonate and 2.21 mL (12.7 mmol) of DIPEA in 18 ml THF at rt for 16 h. After evaporation of the solvents, 11 mL DCM and 100 mL hexane were added. Cooling in a fridge, filtration with suction, washing with hexane, and drying of the solid gave 2.72 g (81% yield) of the title compound.

MS (ESIpos):  $m/z = 292$  (M+H)<sup>+</sup>

### **Intermediate 11-c**

#### **Ethyl {5-[(*tert*-butoxycarbonyl)amino]-6-isopropoxy-2H-indazol-2-yl}acetate**

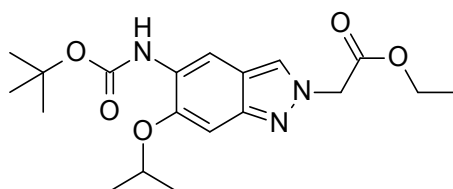

2.72 g (9.3 mmol) of *tert*-butyl (6-isopropoxy-1H-indazol-5-yl)carbamate were reacted with 3.10 mL (28.0 mmol) of ethyl bromoacetate. This gave 1.84 g (52% yield) of the title compound.

MS (ESIpos):  $m/z = 378$  (M+H)<sup>+</sup>

<sup>1</sup>H NMR (DMSO-*d*<sub>6</sub>, 600 MHz)  $\delta$  1.21 (t, 3H,  $J=7.2$  Hz), 1.34 (d, 6H,  $J=6.0$  Hz), 1.48 (s, 9H), 4.16 (q, 2H,  $J=7.1$  Hz), 4.71 (spt, 1H,  $J=6.0$  Hz), 5.27 (s, 2H), 6.98 (s, 1H), 7.63 (s, 1H), 7.97 (s, 1H), 8.17 (s, 1H).

### **Intermediate 11-d**

#### **Ethyl (5-amino-6-isopropoxy-2H-indazol-2-yl)acetate**

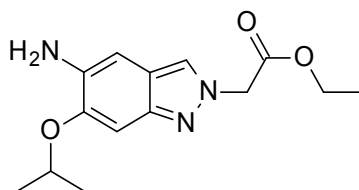

1.8 g (4.84 mmol) of ethyl {5-[(*tert*-butoxycarbonyl)amino]-6-isopropoxy-2H-indazol-2-yl}acetate were reacted with 2.8 mL (36.3 mmol) of TFA. This gave 1.3 g (100% yield) of the title compound.

MS (ESIpos):  $m/z = 278$  (M+H)<sup>+</sup>

<sup>1</sup>H NMR (DMSO-*d*<sub>6</sub>, 300 MHz)  $\delta$  1.20 (t, 3H,  $J=7.1$  Hz), 1.32 (d, 6H,  $J=6.1$  Hz), 4.15 (q, 2H,  $J=7.1$  Hz), 4.59 (s, 1H), 4.60–4.69 (m, 1H), 5.16 (s, 2H), 6.64 (s, 1H), 6.80 (s, 1H), 7.83 (s, 1H).

### **Intermediate 11-e**

#### **Ethyl [6-isopropoxy-5-({[6-(trifluoromethyl)59yridine-2-yl]carbonyl}amino)-2H-indazol-2-yl]acetate**

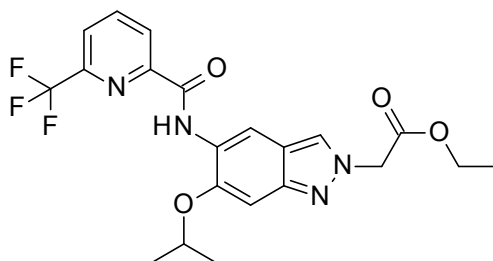

300 mg (1.08 mmol) of ethyl (5-amino-6-isopropoxy-2H-indazol-2-yl)acetate were reacted with 227 mg (1.19 mmol) of 6-(trifluoromethyl)pyridine-2-carboxylic acid. This resulted in 487 mg (100% yield) of the title compound.

MS (ESIpos):  $m/z = 451$  (M+H)<sup>+</sup>

<sup>1</sup>H NMR (DMSO-*d*<sub>6</sub>, 300 MHz)  $\delta$  1.21 (t, 3H,  $J=7.2$  Hz), 1.40 (d, 6H,  $J=5.8$  Hz), 4.17 (q, 2H,  $J=7.1$  Hz), 4.79–4.92 (m, 1H), 5.32 (s, 2H), 7.18 (s, 1H), 8.22 (d, 1H), 8.33 (s, 1H), 8.37–8.50 (m, 2H), 8.75 (s, 1H), 10.75 (s, 1H).

### **Intermediate 11-f**

#### **[6-Isopropoxy-5-({[6-(trifluoromethyl)pyridine-2-yl]carbonyl}amino)-2H-indazol-2-yl]acetic acid**

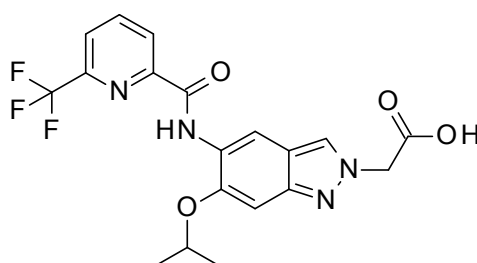

490 mg (1.1 mmol) of ethyl [6-isopropoxy-5-({[6-(trifluoromethyl)pyridine-2-yl]carbonyl}amino)-2H-indazol-2-yl]acetate were reacted with 260 mg (11 mmol) of lithium hydroxide. This gave 367 mg (80% yield) of the title compound.

MS (ESIpos):  $m/z = 423$  (M+H)<sup>+</sup>

<sup>1</sup>H NMR (DMSO-*d*<sub>6</sub>, 300 MHz)  $\delta$  1.40 (d, 6H,  $J=6.0$  Hz), 1.7–1.8 (m, 2H), 3.5–3.6 (m, 2H), 4.85 (td, 1H,  $J=6.0, 12.0$  Hz), 5.20 (s, 2H), 7.16 (s, 1H), 8.21 (dd, 1H,  $J=1.1, 7.5$  Hz), 8.29 (s, 1H), 8.4–8.5 (m, 2H), 8.74 (s, 1H), 10.74 (s, 1H), 13.20 (br s, 1H)

### **Compound 11 (step 11-g)**

#### **N-{2-[2-(4-Benzoylpiperazin-1-yl)-2-oxoethyl]-6-isopropoxy-2H-indazol-5-yl}-6-methylpyridine-2-carboxamide**

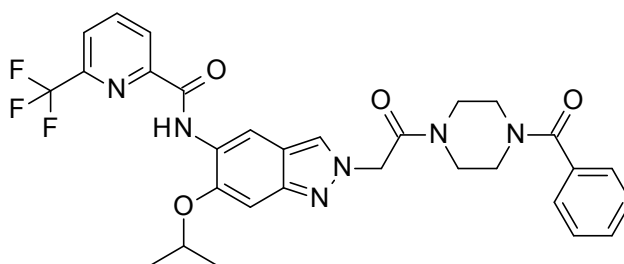

87 mg (0.17 mmol) of [6-Isopropoxy-5-({[6-(trifluoromethyl)pyridine-2-yl]carbonyl}amino)-2H-indazol-2-yl]acetic acid were reacted with 47.3 mg (1.5 eq.) of phenyl(piperazin-1-yl)methanone. This gave 68 mg (0.11 mmol, 69% yield) of the title compound.

LC-MS (method A): Rt = 1.26 min; MS (ESIpos): m/z = 595 [M+H]<sup>+</sup>

<sup>1</sup>H NMR (DMSO-d<sub>6</sub>, 300 MHz) δ 1.40 (d, 7H, J=6.0 Hz), 3.37 (br s, 1H), 3.55 (br s, 3H), 3.64 (br s, 3H), 4.85 (td, 1H, J=6.0, 11.9 Hz), 5.41 (br s, 2H), 7.14 (s, 1H), 7.4–7.5 (m, 5H), 8.2–8.2 (m, 2H), 8.4–8.5 (m, 2H), 8.74 (s, 1H), 10.74 (s, 1H)

## Synthesis of compound 12

### Compound 12 (step 12-a)

#### **N-{6-Fluoro-2-[2-(4-methylpiperazin-1-yl)-2-oxoethyl]-2H-indazol-5-yl}-6-(trifluoromethyl)pyridine-2-carboxamide**

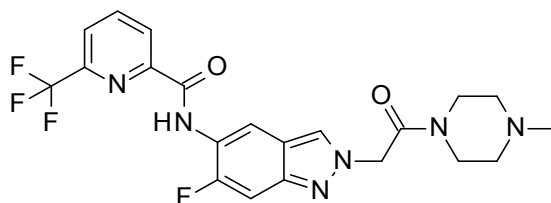

81 mg (0.42 mmol) EDC and 32 mg (0.21 mmol) HOBt were added to 80 mg (0.21 mmol) [6-fluoro-5-({[6-(trifluoromethyl)pyridin-2-yl]carbonyl}amino)-2H-indazol-2-yl]acetic acid (intermediate 8-e) in 3 mL THF and 0.33 mL DMF and the mixture was stirred for 30 min at rt. Then, 36 μL (0.31 mmol) 1-methylpiperazine were added and the resulting mixture was stirred for 30 minutes before being poured into 50 mL of water and, after stirring for a further 5 min, 10 mL ethyl acetate were added and the phases were separated. The aqueous phase was extracted with ethyl acetate twice, and the combined organic layers were washed with water, dried with magnesium sulfate, and evaporated. Preparative HPLC purification afforded 42 mg (43% yield) of the title compound.

LC-MS (method A): Rt = 0.93 min; MS (ESIpos): m/z = 465 [M+H]<sup>+</sup>

<sup>1</sup>H NMR (DMSO-d<sub>6</sub>, 300 MHz) δ 2.21 (s, 3H), 2.29 (m, 2H), 2.38 (m, 2H), 3.47 (m, 2H), 3.55 (m, 2H), 5.47 (s, 2H), 7.52 (d, 1H), 8.22 (m, 1H), 8.34–8.48 (m, 4H), 10.24 (m, 1H).

## Synthesis of compound 13

### Intermediate 13-a

***tert*-Butyl 6-bromo-5-[(*tert*-butoxycarbonyl)amino]-1H-indazole-1-carboxylate and *tert*-butyl 6-bromo-5-[(*tert*-butoxycarbonyl)amino]-2H-indazol-2-carboxylate**

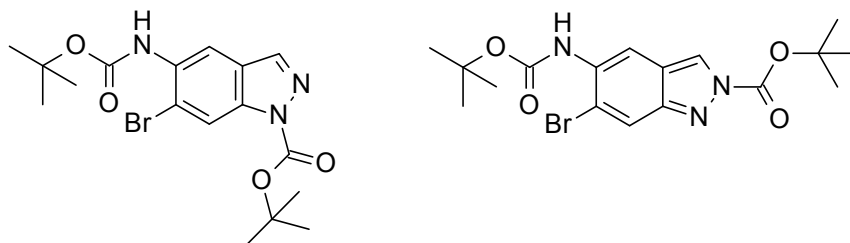

27.5 g (126.1 mmol) of di-*tert*-butyl dicarbonate were dissolved in 53.5 mL of THF and cooled to 0 °C. After the addition of 5.35 g (25.2 mmol) of 6-bromo-1H-indazole-5-amine (CAS Number 1360928-41-1) at 0 °C, the mixture was then stirred at 80 °C for 24 h. The reaction mixture was concentrated, DCM was added, and the reaction mixture was washed with 0.5 M HCl and brine; dried over sodium sulphate; and, during concentration, adsorbed onto ISOLUTE® HM-N (Biotage). The Isolute was then applied to a Biotage SNAP cartridge (340 g; KP-Sil) pre-equilibrated with hexane and chromatography was carried out using the Isolera® flash purification system (Biotage) (mobile phase: hexane/ethyl acetate; gradient: isocratic 80:20). This afforded 7.07 g (68% yield) of the regioisomeric product mixture (ratio: 1-isomer/2-isomer: 85%/15%).

MS (ESI<sup>neg</sup>):  $m/z = 410$  ( $M(^{79}\text{Br})\text{-H}^+$ )

### Intermediate 13-b

***tert*-Butyl (6-bromo-1H-indazol-5-yl)carbamate**

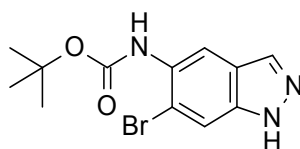

7.05 g (17.1 mmol) of a mixture of *tert*-butyl 6-bromo-5-[(*tert*-butoxycarbonyl)amino]-1H-indazole-1-carboxylate and *tert*-butyl 6-bromo-5-[(*tert*-butoxycarbonyl)amino]-2H-indazole-2-carboxylate (from the previous step) were dissolved in 141 mL of DMF and 2.17 g (20.5 mmol) of sodium carbonate in 71 mL of water was added. The reaction mixture was heated at 85 °C for 24 h. Dichloromethane was added and the reaction mixture was washed with 0.5

M HCl and brine, dried over sodium sulphate, and concentrated. The product was dried under reduced pressure. This gave 5.35 g (98% yield) of the title compound.

MS (ESI<sub>neg</sub>):  $m/z = 310$  ( $M(^{79}\text{Br})-\text{H}^+$ )

<sup>1</sup>H NMR (CHLOROFORM-*d*, 400 MHz)  $\delta$  1.57 (s, 9 H), 7.01 (br. s., 1 H), 7.83 (s, 1 H), 8.07 (s, 1 H), 8.50 (s, 1 H).

### Intermediate 13-c

#### **Ethyl {6-bromo-5-[(*tert*-butoxycarbonyl)amino]-2H-indazol-2-yl}acetate**

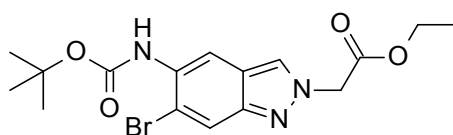

Similarly to the synthesis of intermediate 7-b, 4.85 g (15.5 mmol) of *tert*-butyl (6-bromo-1H-indazol-5-yl)carbamate, 6.89 mL (62.1 mmol) of ethyl bromoacetate, and 13.3 mL (62.1 mmol) of *N,N*-dicyclohexylmethylamine in 50 mL of THF were stirred at 70 °C for 24 h. Work-up and purification by column chromatography using the Isolera<sup>®</sup> flash purification system (Biotage) (mobile phase: hexane/DCM/ethyl acetate) gave 2.01 g (32% yield) of the title compound.

MS (ESI<sub>pos</sub>):  $m/z = 398$  ( $M(^{79}\text{Br})+\text{H}^+$ )

<sup>1</sup>H NMR (DMSO-*d*<sub>6</sub>, 400 MHz)  $\delta$  1.21 (t, 3H,  $J=7.2$  Hz), 1.45 (s, 9H), 4.17 (q, 2H,  $J=7.0$  Hz), 5.40 (s, 2H), 7.78 (s, 1H), 7.96 (s, 1H), 8.41 (d, 1H), 8.54 (s, 1H).

### Intermediate 13-d

#### **{6-Bromo-5-[(*tert*-butoxycarbonyl)amino]-2H-indazol-2-yl}acetic acid**

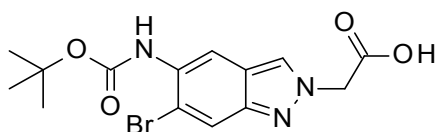

Similar to intermediate 7-c, 1.00 g (2.5 mmol) of ethyl {6-bromo-5-[(*tert*-butoxycarbonyl)amino]-2H-indazol-2-yl}acetate was dissolved in 50 mL of THF, a solution of 301 mg (12.6 mmol) of lithium hydroxide monohydrate in 4.5 mL of water was then added and the mixture was stirred at 25 °C for 24 h. Work-up gave 844 mg (82% yield) of the title compound.

MS (ESI<sub>pos</sub>):  $m/z = 370$  ( $M(^{79}\text{Br})+\text{H}^+$ )

$^1\text{H}$  NMR (DMSO- $d_6$ , 300 MHz)  $\delta$  1.45 (s, 9 H), 3.35 (s br, 1 H), 5.28 (s, 2 H), 7.76 (s, 1 H), 7.95 (s, 1 H), 8.38 (s, 1 H), 8.52 (s, 1 H).

### **Intermediate 13-e**

***tert*-Butyl {6-bromo-2-[2-(4-methylpiperazin-1-yl)-2-oxoethyl]-2H-indazol-5-yl}carbamate**

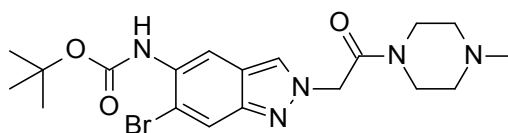

Similar to the synthesis of intermediate 7-d, 800 mg (1.97 mmol) of {6-bromo-5-[(*tert*-butoxycarbonyl)amino]-2H-indazol-2-yl}acetic acid was reacted with 246  $\mu\text{L}$  (2.17 mmol) of 1-methylpiperazine. This gave 824 mg (93% yield) of the title compound.

MS (ESIpos):  $m/z$  = 452 ( $M(^{79}\text{Br})+H$ ) $^+$

$^1\text{H}$  NMR (DMSO- $d_6$ , 300 MHz)  $\delta$  1.45 (s, 9 H), 2.20 (s, 3 H), 2.25–2.34 (m, 2 H), 2.34–2.40 (m, 2 H), 3.43–3.49 (m, 2 H), 3.50–3.55 (m, 2 H), 5.47 (s, 2 H), 7.75 (s, 1 H), 7.93 (s, 1 H), 8.31 (s, 1 H), 8.54 (s, 1 H).

### **Intermediate 13-f**

**2-(5-Amino-6-bromo-2H-indazol-2-yl)-1-(4-methylpiperazin-1-yl)ethanone**

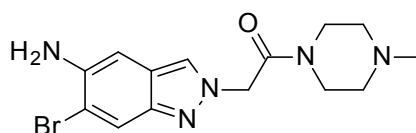

Similar to the synthesis of intermediate 7-e, 293 mg (0.65 mmol) of *tert*-butyl {6-bromo-2-[2-(4-methylpiperazin-1-yl)-2-oxoethyl]-2H-indazol-5-yl}carbamate was reacted with 499  $\mu\text{L}$  (6.48 mmol) of TFA in 3 mL of DCM. Work-up gave 210 mg (92% yield) of the title compound.

MS (ESIpos):  $m/z$  = 352 ( $M(^{79}\text{Br})+H$ ) $^+$

$^1\text{H}$  NMR (DMSO- $d_6$ , 400 MHz)  $\delta$  2.18 (s, 3H), 2.2–2.4 (m, 4H), 3.4–3.5 (m, 4H), 4.90 (s, 2H), 5.33 (s, 2H), 6.91 (s, 1H), 7.76 (s, 1H), 7.94 (d, 1H,  $J=0.8$  Hz).

### **Intermediate 13-g**

**{6-bromo-2-[2-(4-methylpiperazin-1-yl)-2-oxoethyl]-2H-indazol-5-yl}-6-(trifluoromethyl)pyridine-2-carboxamide**



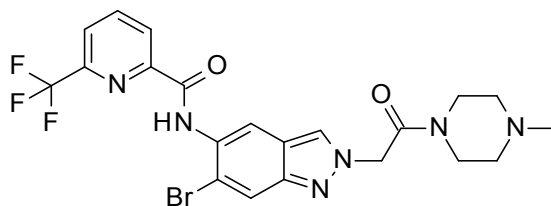

110 mg (0.31 mmol) 2-(5-Amino-6-bromo-2H-indazol-2-yl)-1-(4-methylpiperazin-1-yl)ethanone were dissolved in 2 mL THF and 2 mL DMF. Afterwards, 120 mg (0.62 mmol, 2.0 eq.) EDC, 47.8 mg (0.31 mmol, 1.0 eq.) HOBt, 0.31 mL TEA (3.0 eq.), and 71.6 mg (0.37 mmol, 1.2 eq.) 6-(trifluoromethyl)pyridine-2-carboxylic acid were added and the mixture was stirred at rt resulting in a suspension that was poured into water. The solid was filtered out with suction, washed with diethylether, and dried to afford 125 mg (76% yield) of a white solid.

MS (ESIpos):  $m/z = 525$  ( $M(79Br)+H$ )<sup>+</sup>

<sup>1</sup>H NMR (DMSO-*d*<sub>6</sub>, 300 MHz)  $\delta$  2.21 (s, 3 H), 2.29 (br. s., 2 H), 2.38 (br. s., 2 H), 3.47 (br. s., 2 H), 3.54 (br. s., 2 H), 5.50 (s, 2 H), 8.09 (s, 1 H), 8.24 (d, 1 H), 8.35–8.50 (m, 3 H), 8.64 (s, 1 H), 10.54 (s, 1 H).

### **Compound 13 (step 13-h)**

#### **N-{6-Cyano-2-[2-(4-methylpiperazin-1-yl)-2-oxoethyl]-2H-indazol-5-yl}-6-(trifluoromethyl)pyridine-2-carboxamide**

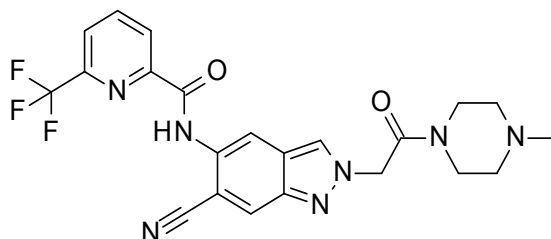

50 mg (0.10 mmol) of *N*{6-bromo-2-[2-(4-methylpiperazin-1-yl)-2-oxoethyl]-2H-indazol-5-yl}-6-(trifluoromethyl)pyridine-2-carboxamide, 5 mg (0.005 mmol) of tetrakis(triphenylphosphine)palladium(0), and 12 mg (0.10 mmol) of zinc cyanide were initially charged in a microwave vessel and suspended in 1 mL of DMF. The reaction mixture was stirred in the microwave at 150 °C for 15 minutes. Since the reaction was still incomplete, another 5 mg (0.005 mmol) of tetrakis(triphenylphosphine)palladium(0) and 5.5 mg (0.05 mmol) of zinc cyanide were added and the mixture was stirred in the microwave at 150 °C for a further 30 minutes. The reaction mixture was diluted with ethyl acetate and washed with water and brine. The solution was then filtered through a hydrophobic filter and concentrated.

The crude product was dissolved in 2.5 mL of DMF and purified by preparative HPLC. The product fraction was lyophilized. This gave 25 mg (56% yield) of the title compound.

LC-MS (method C): Rt = 0.81 min; MS (ESIpos): m/z = 472 [M+H]<sup>+</sup>

<sup>1</sup>H NMR (DMSO-d<sub>6</sub>, 400 MHz) δ 2.22 (s, 3 H), 2.27–2.33 (m, 2 H), 2.36–2.42 (m, 2 H), 3.44–3.50 (m, 2 H), 3.52–3.58 (m, 2 H), 5.59 (s, 2 H), 8.21–8.26 (m, 2 H), 8.37–8.43 (m, 2 H), 8.43–8.47 (m, 1 H), 8.51 (d, 1 H), 10.66 (s, 1 H).

## Synthesis of compound 14

### Intermediate 14-a

#### **N-(6-Methoxy-1H-indazol-5-yl)-6-(trifluoromethyl)pyridine-2-carboxamide**

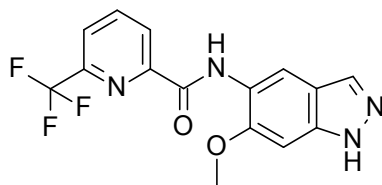

6-methoxy-1H-indazol-5-amine (25.0 g, 153 mmol, CAS Number 749223-61-8) and 6-(trifluoromethyl)pyridine-2-carboxylic acid (32.2 g, 169 mmol) were dissolved in THF (600 ml) and 1-(3-dimethylaminopropyl)-3-ethylcarbodiimide hydrochloride (44.1 g, 230 mmol), TEA (64 ml, 460 mmol), and HOBt (23.5 g, 153 mmol) were added. The reaction mixture was stirred for 22 h at 25 °C. Afterwards, the reaction mixture was diluted with water and extracted three times with ethyl acetate. The combined organic layers were washed with brine, filtered over a water-repellent filter, and concentrated *in vacuo*. The formed suspension was filtered, washed with diethylether, and dried. The residual filtrate was concentrated *in vacuo* and the residue was triturated with diethyl ether. This suspension was filtered, washed with diethylether and also dried. The dried solids were combined to afford 37.3 g (71% yield) of the title compound.

MS (ESIpos): m/z = 337 [M+H]<sup>+</sup>

<sup>1</sup>H NMR (DMSO-d<sub>6</sub>, 400 MHz) δ 4.00 (s, 3H), 7.12 (s, 1H), 8.01 (s, 1H), 8.20 (dd, J=7.71, 0.88 Hz, 1H), 8.36–8.42 (m, 1H), 8.44–8.50 (m, 1H), 8.73 (s, 1H), 10.41 (s, 1H), 12.90 (br s, 1H).

### Intermediate 14-b

***tert*-Butyl [6-methoxy-5-({[6-(trifluoromethyl)pyridin-2-yl]carbonyl}amino)-2H-indazol-2-yl]acetate**

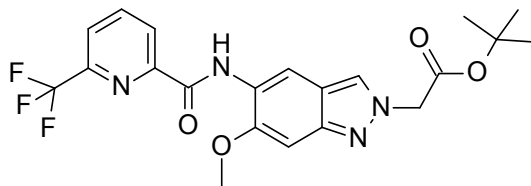

6.50 g (19.3 mmol) of *N*-(6-methoxy-1H-indazol-5-yl)-6-(trifluoromethyl)pyridine-2-carboxamide were dissolved in 100 mL THF and 8.56 mL (58.0 mmol) of *tert*-butyl bromoacetate and 8.20 mL (38.7 mmol) of *N,N*-dicyclohexylmethylamine were added at 25 °C. The solution was stirred at 70 °C for 18 h. 0.5 eq. of *tert*-butyl bromoacetate and 0.5 eq. *N,N*-dicyclohexylmethylamine were added, and the mixture was stirred at 70 °C for a further 7 h. The solid in the reaction mixture was filtered off and washed with ethyl acetate, water, and diethylether and dried to afford 4.4 g (51% yield) of the title compound. A second batch crystallized from the filtrate produced 616 mg (7% yield) of the title compound.

MS (ESIpos):  $m/z = 451$  (M+H)<sup>+</sup>

<sup>1</sup>H NMR (DMSO-*d*<sub>6</sub>, 500 MHz)  $\delta$  1.45 (s, 9H), 3.99 (s, 3H), 5.20 (s, 2H), 7.14 (s, 1H), 8.21 (dd, 1H,  $J=1.0, 7.6$  Hz), 8.30 (s, 1H), 8.41 (t, 1H,  $J=7.8$  Hz), 8.47 (d, 1H,  $J=7.6$  Hz), 8.71 (s, 1H), 10.51 (s, 1H)

**Intermediate 14-c**

**[6-Methoxy-5-({[6-(trifluoromethyl)pyridine-2-yl]carbonyl}amino)-2H-indazol-2-yl]acetic acid**

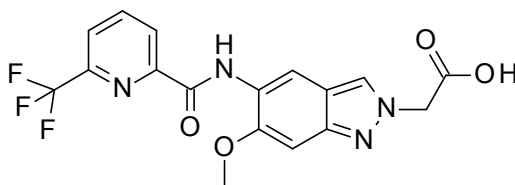

5.0 g (11.1 mmol) of *tert*-butyl [6-methoxy-5-({[6-(trifluoromethyl)pyridine-2-yl]carbonyl}amino)-2H-indazol-2-yl]acetate was stirred in 8.5 mL (48.8 mmol) trifluoroacetic acid and 50 mL DCM for 3 days at 25 °C. Water was added and the resulting solid was filtered off, washed with water and diethylether, and dried to afford 5.1 g (batch contained water) of the title compound.

MS (ESIpos):  $m/z = 395$  (M+H)<sup>+</sup>

$^1\text{H}$  NMR (DMSO- $d_6$ , 400 MHz)  $\delta$  3.98 (s, within water signal), 5.20 (s, 2H), 7.13 (s, 1H), 8.20 (dd, 1H,  $J=1.0, 7.6$  Hz), 8.30 (s, 1H), 8.39 (t, 1H,  $J=7.8$  Hz), 8.46 (d, 1H,  $J=7.3$  Hz), 8.70 (s, 1H), 10.50 (s, 1H)

### **Intermediate 14-d**

#### **N-{6-Methoxy-2-[2-(4-methylpiperazin-1-yl)-2-oxoethyl]-2H-indazol-5-yl}-6-(trifluoromethyl)pyridine-2-carboxamide**

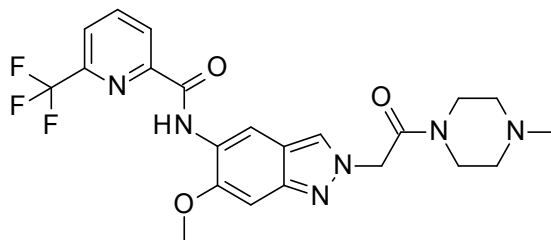

1.94 g (19.4 mmol) 1-methylpiperazine, 1.98 g HOBt, 4.96 g EDC, and 9.0 mL (65 mmol) TEA were added to 5.10 g [6-methoxy-5-({[6-(trifluoromethyl)pyridin-2-yl]carbonyl}amino)-2H-indazol-2-yl]acetic acid (batch yielded by the previous step) in 150 mL THF. The resulting mixture was stirred at rt for 24 h and at 50 °C for 2 h. The mixture was diluted with water, most of the solvents were evaporated, and the resulting solid was filtered off, washed with water and diethylether and dried *in vacuo* to afford 5.0 g (10.3 mmol) of the title compound. LC-MS (method A):  $R_t = 0.90$  min; MS (ESIpos):  $m/z = 477$   $[M+H]^+$

$^1\text{H}$  NMR (DMSO- $d_6$ , 400 MHz)  $\delta$  2.20 (s, 3H), 2.28 (br t, 2H,  $J=4.8$  Hz), 2.36 (br t, 2H,  $J=4.5$  Hz), 3.4–3.5 (m, 2H), 3.5–3.6 (m, 2H), 3.98 (s, 3H), 5.37 (s, 2H), 7.10 (s, 1H), 8.20 (d, 1H,  $J=7.6$  Hz), 8.22 (s, 1H), 8.39 (t, 1H,  $J=7.8$  Hz), 8.45 (d, 1H,  $J=7.6$  Hz), 8.69 (s, 1H), 10.50 (s, 1H)

### **Synthesis of compound 15**

#### **Intermediate 15-a**

#### **5-Nitro-6-(trifluoromethoxy)-1H-indazole**

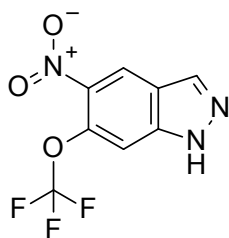

25.4 g (100 mmol) of 2-fluoro-5-nitro-4-(trifluoromethoxy)benzaldehyde was initially charged in 200 mL of absolute ethanol, and 25 mL (513.6 mmol) of hydrazine hydrate were added. The colour of the solution darkened. The reaction mixture was heated under reflux for 2 h. The reaction mixture was then added to 1.4 L of water and stirred vigorously for 10 minutes. The resulting precipitate was filtered off with suction and washed with 40 mL of water three times. The resulting solid was then dried. This gave 19.4 g (78% yield) of the title compound. MS (ESIpos):  $m/z = 248$  (M+H)<sup>+</sup>

<sup>1</sup>H NMR (DMSO-d<sub>6</sub>, 400 MHz)  $\delta$  7.86 (s, 1 H), 8.46 (s, 1 H), 8.82 (s, 1 H), 13.87 (br. s., 1 H).

### **Intermediate 15-b**

#### **6-(Trifluoromethoxy)-1H-indazole-5-amine**

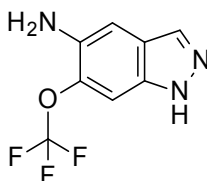

10.0 g (40.5 mmol) of 5-nitro-6-(trifluoromethoxy)-1H-indazole were dissolved in 400 mL of methanol. The solution was then degassed and flushed with nitrogen twice. 2.48 g (2.0 mmol) of palladium on activated carbon were added, after which the flask was evacuated and flushed with hydrogen. The reaction mixture was hydrogenated under standard hydrogen pressure at rt for 5 h. The reaction mixture was filtered through a polytetrafluoroethylene filter with Celite<sup>®</sup> and concentrated. This gave 7.2 g (74% yield) of the title compound.

MS (ESIpos):  $m/z = 218$  (M+H)<sup>+</sup>

<sup>1</sup>H NMR (DMSO-d<sub>6</sub>, 400 MHz)  $\delta$  4.91 (s, 2 H), 7.04 (s, 1 H), 7.32 (s, 1 H), 7.83 (s, 1 H), 12.72 (br. s., 1 H).

### **Intermediate 15-c**

#### ***tert*-Butyl [6-(trifluoromethoxy)-1H-indazol-5-yl]carbamate**

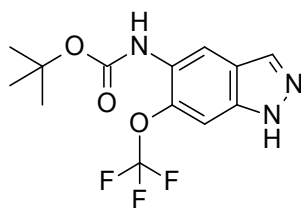

5.0 g (23.0 mmol) of 6-(trifluoromethoxy)-1H-indazole-5-amine were suspended in 100 mL of THF, 4.81 mL (27.6 mmol) of DIPEA were added and the mixture was cooled to 0 °C. After the addition of 5.52 g (25.3 mmol) of di-*tert*-butyl dicarbonate at 0 °C, the mixture was stirred at 25 °C for 18 h. A further 3.52 g (16.1 mmol) of di-*tert*-butyl dicarbonate was added, and the mixture was stirred at 25 °C for a further 24 h. The reaction mixture was then heated at reflux for a further 24 h, after which it was concentrated, taken up in ethyl acetate, and washed with 0.5 M HCl, sat. sodium bicarbonate solution, and brine. The combined organic phases were dried over sodium sulphate and the solution was concentrated after filtration. Chromatography was carried out using the Isolera® flash purification system (Biotage) (mobile phase: hexane/ethyl acetate). The combined product fractions were concentrated and the brownish solid was dried under reduced pressure. This gave 3.48 g (48% yield) of the title compound.

MS (ESIpos):  $m/z = 318$  (M+H)<sup>+</sup>

<sup>1</sup>H NMR (DMSO-*d*<sub>6</sub>, 300 MHz)  $\delta = 1.44$  (s, 9 H), 7.51 (s, 1 H), 7.83 (s, 1 H), 8.11 (s, 1 H), 8.80 (s, 1 H).

### **Intermediate 15-d**

#### **Ethyl {5-[(*tert*-butoxycarbonyl)amino]-6-(trifluoromethoxy)-2H-indazol-2-yl}acetate**

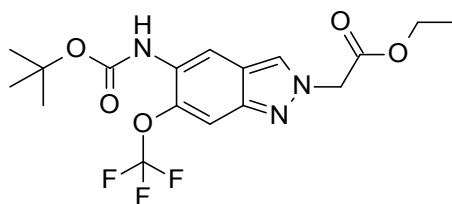

3.17 g (10.0 mmol) of *tert*-butyl [6-(trifluoromethoxy)-1H-indazol-5-yl]carbamate, 5.54 mL (50 mmol) of ethyl bromoacetate, and 10.7 mL (50 mmol) of *N,N*-dicyclohexylmethylamine in 20 mL of THF were heated at 70 °C for 24 h. Work-up and purification by column chromatography using the Isolera® flash purification system (Biotage) (mobile phase: hexane/DCM/ethyl acetate) gave 535 mg (13% yield) of the title product.

MS (ESIpos):  $m/z = 404$  (M+H)<sup>+</sup>

### Intermediate 15-e

#### **{5-[(*tert*-Butoxycarbonyl)amino]-6-(trifluoromethoxy)-2H-indazol-2-yl}acetic acid**

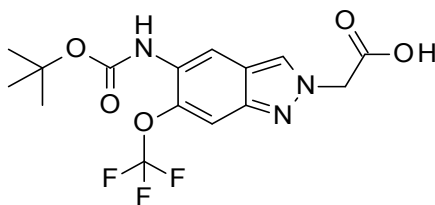

530 mg (1.31 mmol) of ethyl {5-[(*tert*-butoxycarbonyl)amino]-6-(trifluoromethoxy)-2H-indazol-2-yl}acetate were suspended in 20 mL of THF. A solution of 157 mg (6.57 mmol) of lithium hydroxide monohydrate in 2.4 mL of water was then added and the mixture was stirred at 25 °C for 24 h and partly concentrated. Then, aqueous hydrogen chloride solution (1 M) was added and the resulting solid was filtered with suction and washed with cold water to afford 437 mg (81% yield) of the title compound.

MS (ESIpos):  $m/z = 376$  (M+H)<sup>+</sup>

<sup>1</sup>H NMR (DMSO-*d*<sub>6</sub>, 400 MHz)  $\delta$  1.43 (s, 9 H), 5.28 (s, 2 H), 7.56 (s, 1 H), 7.80 (s, 1 H), 8.40 (d, 1 H,  $J=1.0$  Hz), 8.73 (s, 1 H).

### Intermediate 15-f

#### ***tert*-Butyl {2-[2-(4-methylpiperazin-1-yl)-2-oxoethyl]-6-(trifluoromethoxy)-2H-indazol-5-yl}carbamate**

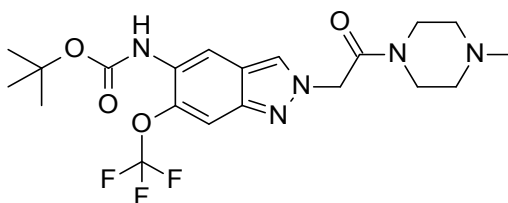

350 mg (0.85 mmol) of *tert*-butyl {2-[2-(4-methylpiperazin-1-yl)-2-oxoethyl]-6-(trifluoromethoxy)-2H-indazol-5-yl}carbamate, 130 mg (0.85 mmol) of HOBt, and 325 mg (1.70 mmol) of EDC in 3.5 mL of DMF and 473  $\mu$ L (3.40 mmol) of TEA were stirred at 25 °C for 30 min. 103  $\mu$ L (0.93 mmol) of 1-methylpiperazine were then added and the mixture was stirred at 25 °C for 24 h. The mixture was poured into 50 mL of water, filtered off with suction, washed with water and dried. This gave 305 mg (78% yield) of the title compound.

MS (ESIpos):  $m/z = 376$  (M+H)<sup>+</sup>

$^1\text{H}$  NMR (DMSO- $d_6$ , 400 MHz)  $\delta$  1.44 (s, 9 H), 2.23 (s, 3 H), 2.28–2.38 (m, 2 H), 2.41 (br. s., 2 H), 3.47 (br. s., 2 H), 3.55 (br. s., 2 H), 5.49 (s, 2 H), 7.54 (s, 1 H), 7.80 (s, 1 H), 8.34 (d, 1 H,  $J=1.0$  Hz), 8.73 (s, 1 H), 9.93 (br. s., 1 H).

### **Intermediate 15-g**

#### **2-[5-Amino-6-(trifluoromethoxy)-2H-indazol-2-yl]-1-(4-methylpiperazin-1-yl)ethanone**

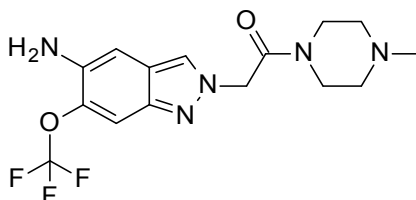

484 mg (1.06 mmol) of *tert*-butyl {2-[2-(4-methylpiperazin-1-yl)-2-oxoethyl]-6-(trifluoromethoxy)-2H-indazol-5-yl}carbamate were reacted with 815  $\mu\text{L}$  of TFA in 5 mL of DCM overnight at rt. The mixture was then heated to 50  $^\circ\text{C}$  for 2 h. The mixture was washed with sat. sodium bicarbonate solution, brine, filtered with a water-repellent filter, and concentrated to afford 320 mg (85% yield) of the title compound.

MS (ESIpos):  $m/z$  = 357 (M+H) $^+$

$^1\text{H}$  NMR (DMSO- $d_6$ , 400 MHz)  $\delta$  2.18 (s, 3H), 2.2–2.4 (m, 4H), 3.4–3.5 (m, 4H), 4.93 (s, 2 H), 5.34 (s, 2 H), 6.87 (s, 1 H), 7.38 (s, 1 H), 7.97 (s, 1 H)

### **Compound 15 (step 15-h)**

#### **N-{2-[2-(4-Methylpiperazin-1-yl)-2-oxoethyl]-6-(trifluoromethoxy)-2H-indazol-5-yl}-6-(trifluoromethyl)pyridine-2-carboxamide**

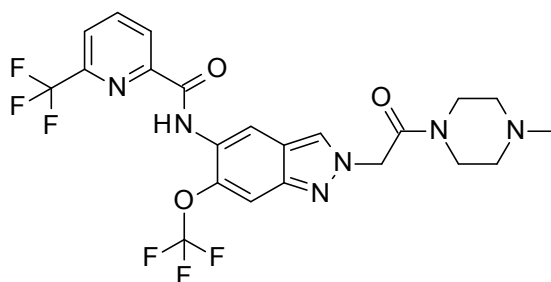

15 mg (1.0 eq.) HOBt, 37.6 mg (2.0 eq.) EDC, 41  $\mu\text{L}$  (3.0 eq.) TEA and 22.5 mg (1.2 eq.) 6-(trifluoromethyl)pyridine-2-carboxylic acid were added to 35.0 mg (100  $\mu\text{mol}$ ) 2-[5-amino-6-(trifluoromethoxy)-2H-indazol-2-yl]-1-(4-methylpiperazin-1-yl)ethanone in 2 mL DMF. The mixture was stirred at rt overnight. Purification by HPLC afforded 25 mg (47% yield) of the title compound.



LC-MS (method C): Rt = 0.95 min; MS (ESIpos): m/z = 531 [M+H]<sup>+</sup>

<sup>1</sup>H NMR (DMSO-d<sub>6</sub>, 400 MHz) δ 2.22 (s, 3H), 2.27–2.36 (m, 2H), 2.37–2.44 (m, 2H), 3.44–3.52 (m, 2H), 3.52–3.60 (m, 2H), 5.52 (s, 2H), 7.75 (s, 1H), 8.23 (dd, 1H, J=1.1, 7.7 Hz), 8.38–8.50 (m, 3H), 8.71 (s, 1H), 10.40 (s, 1H)

## Synthesis of compound 16

### Compound 16 (step 16-a)

**N-{6-Ethoxy-2-[2-(4-methylpiperazin-1-yl)-2-oxoethyl]-2H-indazol-5-yl}-6-(trifluoromethyl)pyridine-2-carboxamide**

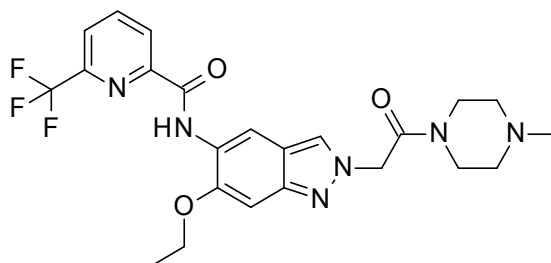

38 mg (1.0 eq.) HOBt, 94 mg (2.0 eq.) EDC and 0.10 mL (3.0 eq.) TEA were added to a mixture of 100 mg (0.25 mmol) [6-ethoxy-5-({[6-(trifluoromethyl)pyridin-2-yl]carbonyl}amino)-2H-indazol-2-yl]acetic acid (Intermediate 10-c) and 1-methylpiperazine (32 mg, 1.3 eq.) in 3 mL THF. After stirring at rt overnight, water and ethyl acetate were added. Evaporation, stirring in a mixture of DMSO and DMF, filtration, washing of the filter residue with diethylether, and drying *in vacuo* afforded 62 mg (51% yield) of the title compound.

LC-MS (method A): Rt = 0.92 min; MS (ESIpos): m/z = 491 [M+H]<sup>+</sup>

<sup>1</sup>H NMR (DMSO-d<sub>6</sub>, 400 MHz) δ 1.49 (t, 3H, J=6.9 Hz), 2.20 (s, 3H), 2.3-2.4 (m, 4H), 3.4-3.5 (m, 2H), 3.54 (br s, 2H), 4.20 (q, 2H, J=7.0 Hz), 5.37 (s, 2H), 7.07 (s, 1H), 8.20 (d, 1H, J=7.9 Hz), 8.21 (s, 1H), 8.40 (t, 1H, J=7.8 Hz), 8.45 (d, 1H, J=7.6 Hz), 8.71 (s, 1H), 10.73 (s, 1H).

## Synthesis of compound 17

### Compound 17 (step 17-a)

**N-{6-Isopropoxy-2-[2-(4-methylpiperazin-1-yl)-2-oxoethyl]-2H-indazol-5-yl}-6-(trifluoromethyl)pyridine-2-carboxamide**

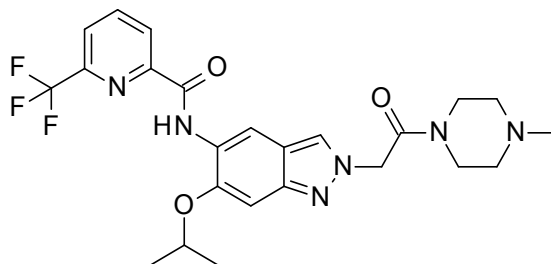

25 mg (1.0 eq.) HOBt and 64 mg (2.0 eq.) EDC were added to a mixture of 70 mg (0.17 mmol) [6-isopropoxy-5-({[6-(trifluoromethyl)pyridine-2-yl]carbonyl}amino)-2H-indazol-2-yl]acetic acid (intermediate 11-f) and 1-methylpiperazine (25 mg, 1.5 eq.) in 2.3 mL THF and 0.25 mL DMF. After stirring at rt overnight the mixture was partly concentrated *in vacuo* and purified by HPLC to afford 30 mg (36% yield) of the title compound.

LC-MS (method C): Rt = 1.04 min; MS (ESIpos): m/z = 505 [M+H]<sup>+</sup>

<sup>1</sup>H NMR (DMSO-d<sub>6</sub>, 500 MHz) δ 1.40 (d, 6H, J=6.0 Hz), 2.2–2.8 (br s), 3.4–3.7 (br s, 2H), 4.84 (td, 1H, J=6.0, 12.0 Hz), 5.39 (s, 2H), 7.14 (s, 1H), 8.20 (d, 1H, J=6.5 Hz), 8.21 (s, 1H), 8.40 (t, 1H, J=7.9 Hz), 8.45 (d, 1H, J=7.6 Hz), 8.74 (s, 1H), 10.73 (s, 1H).

## Synthesis of compound 18

### Intermediate 18-a

#### 5-Amino-1H-indazol-6-ol

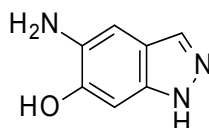

6.5 g (36.3 mmol) of 5-nitro-1H-indazol-6-ol (CAS No. 1082041-56-2) were dissolved in 1.5 L of methanol and hydrogenated with 193 mg (1.8 mmol) of palladium on activated carbon under standard hydrogen pressure at 25 °C for 5 h. This gave, after filtration using Celite®, 5.28 g (98% yield) of the title compound.

MS (ESIpos): m/z = 150 (M+H)<sup>+</sup>

<sup>1</sup>H NMR (DMSO-d<sub>6</sub>, 400 MHz) δ 4.37 (br. s., 2H), 6.71–6.78 (m, 2H), 7.59 (s, 1H), 12.17 (br. s., 1H).

### Intermediate 18-b

#### *tert*-Butyl (6-hydroxy-1H-indazol-5-yl)carbamate

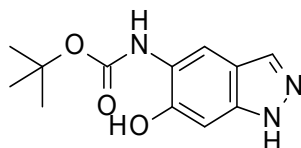

8.05 g (36.8 mmol) of di-*tert*-butyl dicarbonate were suspended in 125 mL of THF and 5.0 g (33.5 mmol) of 5-amino-1H-indazol-6-ol were added with stirring. The reaction mixture was stirred at 25 °C for 24 h and subsequently concentrated. The residue was taken up in methanol and 2 mL of 1 M aqueous sodium hydroxide solution and 2 mL of water were added. The mixture was stirred for another 30 min and the methanol was then distilled off. 1 M HCl was added to the residue until a pH of 7 had been reached. The mixture was then extracted with DCM and the combined organic layers were dried over sodium sulphate, filtered, and concentrated. This gave 7.50 g (90% yield) of the title compound.

MS (ESIpos):  $m/z = 250 (M+H)^+$

$^1\text{H NMR}$  (DMSO- $d_6$ , 300 MHz)  $\delta$  1.47 (s, 9H), 6.88 (s, 1H), 7.66 (s, 1H), 7.82 (s, 1H), 7.91 (s, 1H), 10.19 (br. s., 1H), 12.50 (s, 1H).

### **Intermediate 18-c**

#### ***tert*-Butyl [6-(benzyloxy)-1H-indazol-5-yl]carbamate**

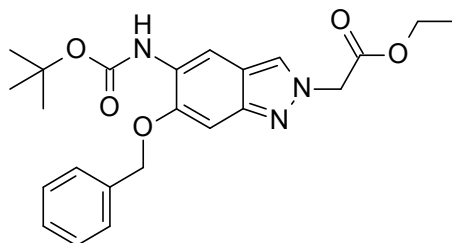

7.50 g (30.1 mmol) of *tert*-butyl (6-hydroxy-1H-indazol-5-yl)carbamate were dissolved in 150 mL of DMF and 5.66 g (33.1 mmol) of benzyl bromide and 8.32 g (60.2 mmol) of potassium carbonate were added with stirring. The reaction mixture was stirred at 25 °C for 24 h. The reaction mixture was then diluted with water and extracted with ethyl acetate. The combined organic phases were washed with saturated sodium chloride solution and the phases were separated and filtered through a water-repellent filter. The residue was taken up in DCM and adsorbed on ISOLUTE. The Isolute was applied to a Biotage SNAP cartridge (340 g; KP-Sil) pre-equilibrated with hexane and chromatography was carried out using the Isolera<sup>®</sup> flash purification system (Biotage, mobile phase: hexane/ethyl acetate). The combined product

fractions were concentrated and dried under reduced pressure. This gave 3.46 g (34% of theory) of the title product.

MS (ESIpos):  $m/z = 340$  (M+H)<sup>+</sup>

<sup>1</sup>H NMR (CHLOROFORM-d, 300 MHz)  $\delta$  1.55 (s, 9H), 5.20 (s, 2H), 6.92 (s, 1H), 7.14 (s, 1H), 7.36–7.49 (m, 5H), 7.94 (d,  $J=0.75$  Hz, 1H), 8.44 (s, 1H).

### **Intermediate 18-d**

#### **Ethyl {6-(benzyloxy)-5-[(tert-butoxycarbonyl)amino]-2H-indazol-2-yl}acetate**

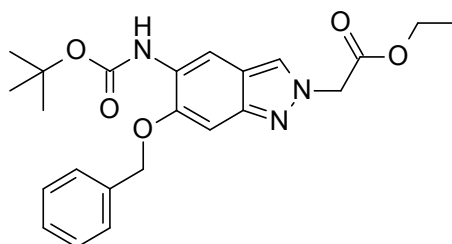

3.45 g (10.2 mmol) of tert-butyl [6-(benzyloxy)-1H-indazol-5-yl]carbamate, 2.26 mL (20.3 mmol) of ethyl bromoacetate, and 4.36 mL (20.3 mmol) of *N,N*-dicyclohexylmethylamine in 50 mL of THF were heated at 70 °C for 2 h. Another 2.26 mL (20.3 mmol) of ethyl bromoacetate and 4.36 mL (20.3 mmol) of *N,N*-dicyclohexylamine were added, and the mixture was stirred at 70 °C for a further 22 h and filtered, after which the filtrate was evaporated. Water and ethyl acetate were added to the residue and the organic layer was separated, the aqueous layer was extracted with ethyl acetate, and the combined organic layers were washed with 1N aqueous hydrochloride solution, saturated aqueous sodium bicarbonate solution, brine, filtered with a water-repellent filter, and concentrated. Purification by column chromatography using a Isolera<sup>®</sup> flash purification system (Biotage, mobile phase: hexane/ethyl acetate) gave 2.37 g (55% of theory) of the title compound.

MS (ESIpos):  $m/z = 426$  (M+H)<sup>+</sup>

<sup>1</sup>H NMR (CHLOROFORM-d, 400 MHz)  $\delta$  = 1.28 (t,  $J=7.20$  Hz, 3 H) 1.54 (s, 9 H) 4.25 (q,  $J=7.24$  Hz, 2 H) 5.09 (s, 2 H) 5.19 (s, 2 H) 7.03 (s, 1 H) 7.25 (s, 1 H) 7.32–7.49 (m, 5 H) 7.82 (s, 1 H) 8.30 (s, 1 H).

### **Intermediate 18-e**

#### **Ethyl [5-amino-6-(benzyloxy)-2H-indazol-2-yl]acetate**

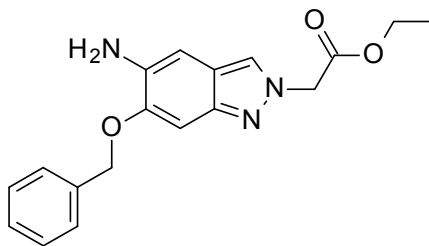

2.37 g (5.56 mmol) of ethyl [6-(benzyloxy)-5-[(tert-butoxycarbonyl)amino]-2H-indazol-2-yl]acetate were reacted with 3.24 mL (41.8 mmol) of trifluoroacetic acid in 25 mL of DCM at rt overnight. The mixture was poured into saturated aqueous sodium bicarbonate solution and stirred for 20 minutes. The organic layer was separated and the aqueous phase was extracted with DCM. The combined organic layers were washed with brine, dried with sodium sulfate, filtered, and dried again, affording 1.79 g (99% yield) of the title compound.

MS (ESIpos):  $m/z = 326 (M+H)^+$

$^1\text{H NMR}$  (CHLOROFORM- $d$ , 400 MHz)  $\delta$  1.29 (t, 3 H,  $J=7.2$  Hz), 4.25 (q, 2 H,  $J=7.2$  Hz), 5.07 (s, 2 H), 5.15 (s, 2 H), 6.81 (s, 1 H), 7.01 (s, 1 H), 7.31–7.45 (m, 3 H), 7.45–7.52 (m, 2 H), 7.67 (s, 1 H).

### **Intermediate 18-f**

#### **Ethyl [6-(benzyloxy)-5-({[6-(trifluoromethyl)pyridin-2-yl]carbonyl}amino)-2H-indazol-2-yl]acetate**

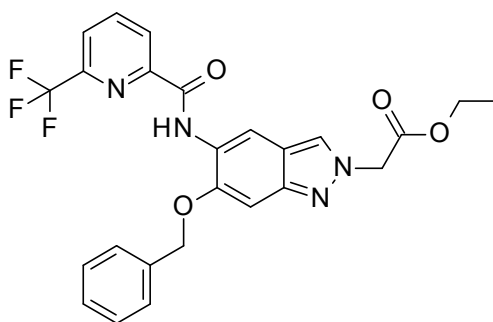

1.79 g (5.5 mmol) of ethyl [5-amino-6-(benzyloxy)-2H-indazol-2-yl]acetate, 1.26 g (6.6 mmol) of 6-(trifluoromethyl)pyridine-2-carboxylic acid, 842 mg (5.5 mmol) of HOBt, 2.11 g (11.0 mmol) of EDC, and 2.3 mL (16.5 mmol) of TEA were stirred in 75 mL of THF at 25 °C for 24 h. The reaction mixture was concentrated and water was added to the residue. The resulting solid was filtered off with suction and washed twice with water and twice with diethyl ether. The yellow solid was dried under reduced pressure. This gave 2.44 g (89% yield) of the title compound.

MS (ESIpos):  $m/z = 499 (M+H)^+$

$^1\text{H}$  NMR (DMSO- $d_6$ , 400 MHz)  $\delta$  1.23 (t, 3H,  $J=7.1$  Hz), 4.18 (q, 2H,  $J=7.2$  Hz), 5.31 (s, 2H), 5.33 (s, 2H), 7.32 (s, 1H), 7.34–7.47 (m, 3H), 7.54–7.61 (m, 2H), 8.18 (d,  $J=7.58$  Hz, 1H), 8.32–8.42 (m, 2H), 8.43–8.52 (m, 1H), 8.81 (s, 1H), 10.47 (s, 1H).

### **Intermediate 18-g**

#### **Ethyl [6-hydroxy-5-({[6-(trifluoromethyl)pyridin-2-yl]carbonyl}amino)-2H-indazol-2-yl]acetate**

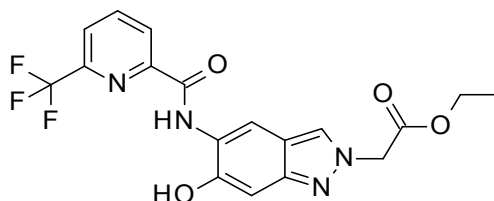

1.0 g (2.01 mmol) of ethyl [6-(benzyloxy)-5-({[6-(trifluoromethyl)pyridin-2-yl]carbonyl}amino)-2H-indazol-2-yl]acetate was dissolved in 40 mL of ethanol, after which the flask was evacuated and then flushed with nitrogen (this procedure was repeated two more times). 213 mg (0.2 mmol) of palladium on carbon were added and the flask was evacuated and flushed with hydrogen. The reaction mixture was hydrogenated under standard hydrogen pressure at 25 °C for 6 h. The reaction mixture was then filtered through a PTFE filter with Celite<sup>®</sup> and concentrated, affording 783 mg (96% yield) of product.

MS (ESIpos):  $m/z = 409$  (M+H)<sup>+</sup>

$^1\text{H}$  NMR (DMSO- $d_6$ , 400 MHz)  $\delta =$  1.22 (t, 3H,  $J=7.1$  Hz,) 4.17 (q, 2 H,  $J=7.2$  Hz) 5.28 (s, 2H) 6.92 (s, 1H) 8.21 (d, 1H,  $J=7.33$  Hz,) 8.27 (s, 1H) 8.40 (t, 1H,  $J=7.83$  Hz,) 8.47 (d, 1H,  $J=7.58$  Hz,) 8.70 (s, 1H) 10.55 (s, 1H) 10.72 (s, 1H)

### **Intermediate 18-h**

#### **Ethyl [6-(cyclopropylmethoxy)-5-({[6-(trifluoromethyl)pyridin-2-yl]carbonyl}amino)-2H-indazol-2-yl]acetate**

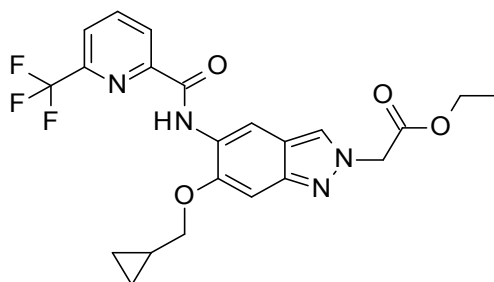

200 mg (0.49 mmol) ethyl [6-hydroxy-5-({[6-(trifluoromethyl)pyridin-2-yl]carbonyl}amino)-2H-indazol-2-yl]acetate were dissolved in 8.6 mL DMF and 203 mg (3.0 eq.) potassium carbonate and 71  $\mu$ L (1.3 eq.) (bromomethyl)cyclopropane were added. After stirring for 1 h at 100 °C in a microwave reactor, water was added and the mixture was extracted with ethyl acetate. The combined organic layers were washed with brine and concentrated to afford 243 mg of the title compound which was used without further purification in the next step.

$^1\text{H}$  NMR (CHLOROFORM- $d$ , 400 MHz)  $\delta$  0.38–0.50 (m, 2H), 0.69–0.84 (m, 2H), 1.30 (t,  $J=7.16$  Hz, 3H), 1.45 (br. s., 1H), 3.98 (d,  $J=6.97$  Hz, 2H), 4.27 (q,  $J=7.16$  Hz, 2H), 5.15 (s, 2H), 6.98 (s, 1H), 7.87 (d,  $J=7.54$  Hz, 1H), 7.93 (s, 1H), 8.13 (t,  $J=7.72$  Hz, 1H), 8.51 (d,  $J=7.72$  Hz, 1H), 8.88 (s, 1H), 10.91 (s, 1H).

### **Intermediate 18-i**

#### **[6-(cyclopropylmethoxy)-5-({[6-(trifluoromethyl)pyridin-2-yl]carbonyl}amino)-2H-indazol-2-yl]acetic acid**

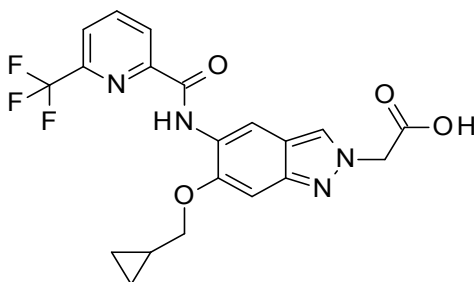

220 mg (0.48 mmol) ethyl [6-(cyclopropylmethoxy)-5-({[6-(trifluoromethyl)pyridin-2-yl]carbonyl}amino)-2H-indazol-2-yl]acetate were dissolved in 10 mL THF and 57 mg (5.0 eq.) lithium hydroxide and 0.9 mL water were added, after which the mixture was stirred for 4 h at rt and acidified to pH = 3 by the addition of 1N aqueous hydrochloride solution. The resulting solid was filtered off with suction, washed with suction, and dried to afford 181 mg (88% yield) of the title compound.

$^1\text{H}$  NMR (DMSO- $d_6$ , 400 MHz)  $\delta$  0.42–0.48 (m, 2H), 0.63–0.69 (m, 2H), 1.29–1.41 (m, 1H), 4.03 (d,  $J=6.82$  Hz, 2H), 5.20 (s, 2H), 7.07 (s, 1H), 8.21 (dd,  $J=7.71, 0.88$  Hz, 1H), 8.29 (s, 1H), 8.37–8.44 (m, 1H), 8.46–8.50 (m, 1H), 8.76 (s, 1H), 10.71 (s, 1H).

### **Compound 18 (step 18-j)**

#### **N-{6-(Cyclopropylmethoxy)-2-[2-(4-methylpiperazin-1-yl)-2-oxoethyl]-2H-indazol-5-yl}-6-(trifluoromethyl)pyridine-2-carboxamide**

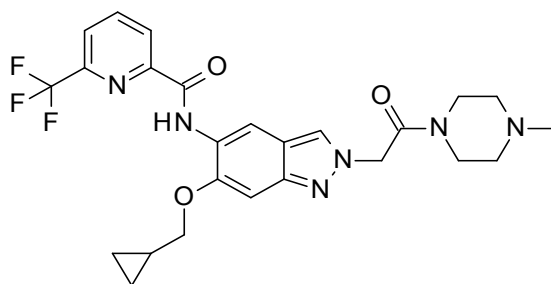

40 mg (0.092 mmol) [6-(cyclopropylmethoxy)-5-({[6-(trifluoromethyl)pyridin-2-yl]carbonyl}amino)-2H-indazol-2-yl]acetic acid were dissolved in 1.5 mL DMF. 35.3 mg (2.0 eq.) EDC, 14 mg (1.0 eq.) HOBt, 30  $\mu$ L (3.0 eq.) TEA, and 11 mg (1.2 eq.) 1-methylpiperazine were added and the mixture was stirred at rt overnight and filtered. The filtrate was purified by HPLC affording 36.5 mg (75% yield) of the title compound.

LC-MS (method D): Rt = 1.20 min; MS (ESIpos): m/z = 517 [M+H]<sup>+</sup>

<sup>1</sup>H NMR (DMSO-d<sub>6</sub>, 400 MHz)  $\delta$  0.39–0.51 (m, 2H), 0.57–0.70 (m, 2H), 1.27–1.43 (m, 1 H), 2.21 (s, 3H), 2.29 (t, 2H, *J*=4.8 Hz), 2.34–2.39 (m, 2H), 3.43–3.49 (m, 2H), 3.51–3.57 (m, 2H), 4.03 (d, 2H, *J*=6.8 Hz), 5.37 (s, 2H), 7.05 (s, 1H), 8.19–8.23 (m, 2H), 8.41 (t, 1H, *J*=7.8 Hz), 8.48 (d, 1H, *J*=7.8 Hz), 8.76 (s, 1H), 10.71 (s, 1H).

## Synthesis of compound 19

### Compound 19 (step 19-a)

#### **N-{6-Methoxy-2-[2-(morpholin-4-yl)-2-oxoethyl]-2H-indazol-5-yl}-6-(trifluoromethyl)pyridine-2-carboxamide**

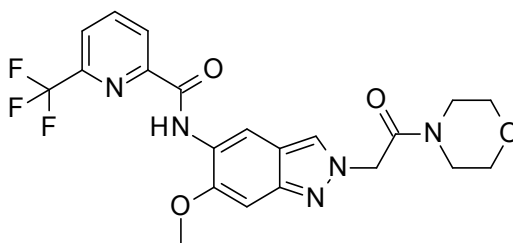

169 mg [6-methoxy-5-({[6-(trifluoromethyl)pyridin-2-yl]carbonyl}amino)-2H-indazol-2-yl]acetic acid (intermediate 14-c, contained approximately 1 eq. TFA) in 13 mL THF and 1.3 mL DMF were treated with 127 mg EDC, 50.9 mg HOBt and 185  $\mu$ L TEA and the mixture was stirred at rt overnight. The mixture was partly concentrated and poured into 25 mL water. The resulting solid was filtered off with suction, washed with water and diethylether and dried to afford 138 mg of the title compound.



LC-MS (method C): Rt = 1.07 min; MS (ESIpos): m/z = 464 [M+H]<sup>+</sup>

<sup>1</sup>H NMR (DMSO-d<sub>6</sub>, 400 MHz) δ 3.41–3.51 (m, 2H), 3.55–3.62 (m, 4H), 3.62–3.68 (m, 2H), 3.99 (s, 3H), 5.40 (s, 2H), 7.12 (s, 1H), 8.19–8.26 (m, 2H), 8.40 (t, 1H, J=7.7 Hz), 8.47 (d, 1H, J=7.6 Hz), 8.71 (s, 1H), 10.51 (s, 1H).

## Synthesis of compound 20

### Compound 20 (step 20-a)

#### **N-{6-Ethoxy-2-[2-(morpholin-4-yl)-2-oxoethyl]-2H-indazol-5-yl]-6-(trifluoromethyl)pyridine-2-carboxamide**

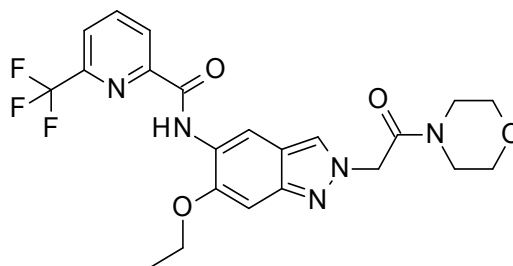

23.3 mg (1.3 eq.) morpholine, 78.9 mg EDC, 31.5 mg (HOBT) and 86 μL TEA were added to 84.0 mg (0.21 mmol) [6-ethoxy-5-({[6-(trifluoromethyl)pyridin-2-yl]carbonyl}amino)-2H-indazol-2-yl]acetic acid (intermediate 10-c) in 2.0 mL DMF and the mixture was stirred at 50 °C overnight. Water and ethyl acetate were added and the resulting solid was filtered off with suction, washed three times with water and three times with diethylether, and dried to afford 90.3 mg (89% yield) of the title compound.

LC-MS (method A): Rt = 1.16 min; MS (ESIpos): m/z = 478 [M+H]<sup>+</sup>

<sup>1</sup>H NMR (DMSO-d<sub>6</sub>, 300 MHz) δ 1.49 (t, 3H, J=6.9 Hz), 3.4–3.7 (m), 4.20 (q, 2H, J=6.7 Hz), 5.38 (s, 2H), 7.07 (s, 1H), 8.2–8.2 (m, 2H), 8.4–8.5 (m, 2H), 8.71 (s, 1H), 10.73 (s, 1H)

## Synthesis of compound 21

### Intermediate 21-a

#### **N-(6-Methoxy-1H-indazol-5-yl)-6-methylpyridine-2-carboxamide**

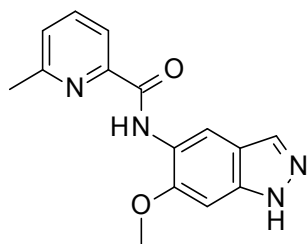

5.00 g (30.64 mmol) of 6-methoxy-1H-indazole-5-amine (CAS Number 749223-61-8) and 4.62 g (33.70 mmol) of 6-methylpyridine-2-carboxylic acid were dissolved in 100 mL of THF and stirred with 4.69 g (30.64 mmol) of HOBt, 11.74 g (61.28 mmol) of EDC, and 21.35 mL (153.2 mmol) of TEA at 25 °C for 20 h. Water was added and the reaction mixture was concentrated. The resulting precipitate was filtered off with suction, washed three times with water and three times with diethylether and dried in a drying cabinet. This gave 7.89 g (65% yield) of the title compound.

MS (ESIpos):  $m/z = 283 (M+H)^+$

### **Intermediate 21-b**

#### **Benzyl (6-methoxy-5-[[6-methylpyridin-2-yl]carbonyl]amino)-2H-indazol-2-yl)acetate**

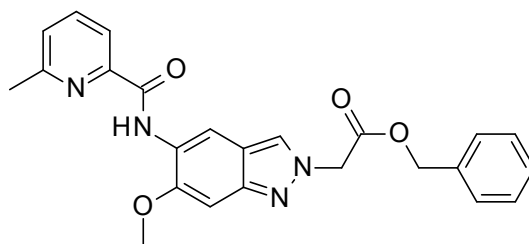

7.57 g (19.0 mmol) of *N*-(6-methoxy-1H-indazol-5-yl)-6-methylpyridine-2-carboxamide were stirred with 6.03 mL (38.1 mmol) of benzyl bromoacetate in 100 mL of THF in the presence of 8.01 mL (38.1 mmol) of *N,N*-dicyclohexylmethylamine at 70 °C for 2.5 h and at 60 °C for 17 h. Another 3.02 mL (19.1 mmol) of benzyl bromoacetate and 4.01 mL (19.1 mmol) of *N,N*-dicyclohexylmethylamine were added and the mixture was stirred at 70 °C for a further 24 h. The solid was filtered off with suction and washed with ethyl acetate. The filtrate was filtered once more and washed twice with ethyl acetate and the solid was dried. Water was added to the filtrate and, after phase separation, the aqueous phase was washed once more with ethyl acetate. The combined organic phases were washed with brine, filtered through a hydrophobic filter, and concentrated. Ethyl acetate was added to the crude product, and the mixture was stirred for 15 minutes. The solid was filtered off with suction, washed three times with ethyl acetate and dried. This gave a total of 6.02 g (63% yield) of the title compound.

MS (ESIpos):  $m/z = 431 (M+H)^+$

$^1\text{H NMR}$  ( $\text{DMSO-}d_6$ , 500 MHz)  $\delta$  2.63 (s, 3H), 4.01 (s, 3H), 5.21 (s, 2H), 5.40 (s, 2H), 7.11 (s, 1H), 7.34–7.40 (m, 5H), 7.55 (dd, 1H,  $J=1.0, 7.3$  Hz), 7.93–8.02 (m, 2H), 8.30–8.33 (m, 1 H), 8.73 (s, 1H), 10.72 (s, 1H).

### **Intermediate 21-c**

#### **(6-Methoxy-5-[[6-methylpyridin-2-yl]carbonyl]amino}-2H-indazol-2-yl)acetic acid**

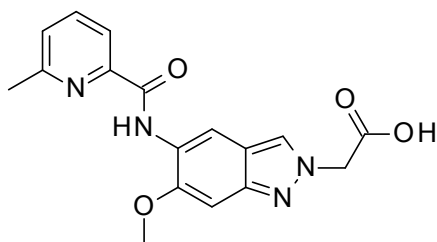

2.28 g (3.92 mmol, crude batch, purity 74% according to HPLC analysis) of benzyl (6-methoxy-5-[[6-methylpyridin-2-yl]carbonyl]amino}-2H-indazol-2-yl)acetate were dissolved in 20 mL of THF and 3.0 mL of methanol, a solution of 1.65 g (39.2 mmol) of lithium hydroxide monohydrate in 3.0 mL of water was then added. The mixture was diluted with water and acidified to pH 4 using aqueous citric acid (10%). The precipitated solid was filtered off, washed three times with water and three times with diethylether and dried under reduced pressure. This gave 2.43 g of the title compound as a crude product.

MS (ESIpos):  $m/z = 341 (M+H)^+$

### **Compound 21 (step 21-d)**

#### **N-{6-Methoxy-2-[2-(morpholin-4-yl)-2-oxoethyl]-2H-indazol-5-yl}-6-methylpyridine-2-carboxamide**

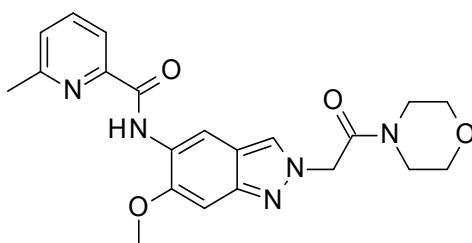

100 mg (0.29 mmol) (6-Methoxy-5-[[6-methylpyridin-2-yl]carbonyl]amino}-2H-indazol-2-yl)acetic acid in DMF (2.0 ml) was treated with 51 mg (2.0 eq.) morpholine, 113 mg (2.0 eq.) EDC, and 45 mg (1.0 mg) HOBt and the mixture was stirred for 20 h at RT. Water was added

and the resulting solid was filtered with suction and washed with water and diethylether and dried resulting in 54.2 mg (43% yield) of the title compound.

LC-MS (method A): Rt = 1.00 min; MS (ESIpos): m/z = 410 [M+H]<sup>+</sup>

<sup>1</sup>H NMR (DMSO-d<sub>6</sub>, 400 MHz) δ 2.63 (s, 3H), 3.47 (s, 2H), 3.53–3.62 (m, 4H), 3.64 (s, 2H), 4.01 (s, 3H), 5.39 (s, 2H), 7.09 (s, 1H), 7.56 (dd, 1H, J=7.1, 1.5 Hz), 7.93–8.03 (m, H), 8.21 (s, 1H), 8.72 (s, 1H), 10.71 (s, 1H).

## Synthesis of compound 22

### Intermediate 22-a

#### Benzyl (5-amino-6-methoxy-2H-indazol-2-yl)acetate

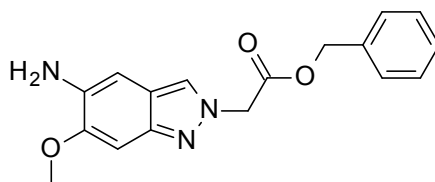

Similar to the preparation of intermediate 7-e, 25.7 g (60.1 mmol) of benzyl {5-[(tert-butoxycarbonyl)amino]-6-methoxy-2H-indazol-2-yl}acetate (intermediate 23-b) were reacted with 23.1 mL (300 mmol) of TFA. This gave 20.5 g (98% yield) of the title compound.

MS (ESIpos): m/z = 312 (M+H)<sup>+</sup>

### Intermediate 22-b

#### Benzyl [5-({[6-(difluoromethyl)pyridin-2-yl]carbonyl}amino)-6-methoxy-2H-indazol-2-yl]acetate

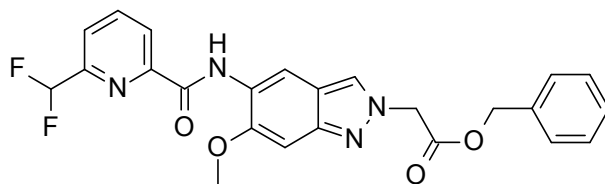

660 mg (2.12 mmol) benzyl (5-amino-6-methoxy-2H-indazol-2-yl)acetate and 440 mg (2.54 mmol, 1.2 eq.) 6-(difluoromethyl)pyridine-2-carboxylic acid in 20 mL THF were treated with 325 mg (1.0 eq.) HOBt, 813 mg (2.0 eq.) EDC, and 0.89 mL (3.0 eq.) TEA and the mixture was stirred at RT for 19 h. Water was added and the resulting solid was filtered off, washed with water, and dried to afford 613 mg (53% yield) of the title compound.

MS (ESIpos):  $m/z = 312 (M+H)^+$

### **Intermediate 22-c**

**[5-({[6-(Difluoromethyl)pyridin-2-yl]carbonyl}amino)-6-methoxy-2H-indazol-2-yl]acetic acid**

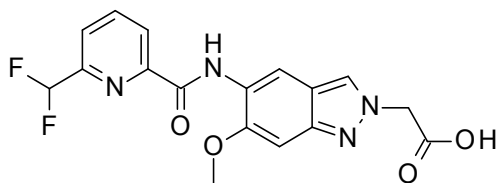

Similar to the preparation of intermediate 7-c, 613 mg of benzyl [5-({[6-(difluoromethyl)pyridin-2-yl]carbonyl}amino)-6-methoxy-2H-indazol-2-yl]acetate were stirred at rt with 469 mg of lithium hydroxide monohydrate in 3 mL of water, 15 mL of THF, and 1 mL of methanol for 3 h. This gave, after analogous work-up, 378 mg of the title compound.

MS (ESIpos):  $m/z = 312 (M+H)^+$

### **Compound 22 (step 22-d)**

**6-(Difluoromethyl)-N-{6-methoxy-2-[2-(morpholin-4-yl)-2-oxoethyl]-2H-indazol-5-yl}pyridine-2-carboxamide**

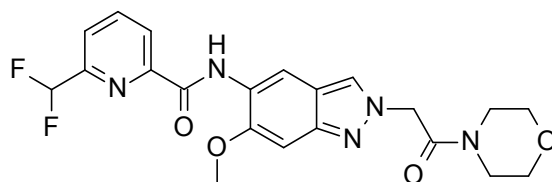

48 mg (1.5 eq.) morpholine, 142 mg (2 eq.) EDC, 56.6 mg HOBt (1.0 eq.) and 154 microliter (3.0 eq.) TEA were added to 139 mg (0.369 mmol) [5-({[6-(difluoromethyl)pyridin-2-yl]carbonyl}amino)-6-methoxy-2H-indazol-2-yl]acetic acid in 3.0 mL THF and the mixture was stirred for 22 h at rt. Water was added and the mixture was stirred for 10 min and the resulting solid was filtered with suction, washed three times with water and three times with diethylether, and dried to afford 121 mg (73% yield) of the title compound.

LC-MS (method A):  $R_t = 0.99$  min; MS (ESIpos):  $m/z = 446 [M+H]^+$

$^1\text{H NMR}$  (DMSO- $d_6$ , 400 MHz)  $\delta$  3.4–3.5 (m, 2H), 3.5–3.7 (m, 6H), 3.99 (s, 3H), 5.39 (s, 2H), 7.01 (s, 1H), 7.10 (s, 1H), 7.14 (s, 1H), 7.28 (s, 1H), 7.99 (d, 1H,  $J=7.3$  Hz), 8.22 (s, 1H), 8.3–8.4 (m, 2H), 8.70 (s, 1H), 10.55 (s, 1H).

## Synthesis of compound 23 and compound 24

### Intermediate 23-a

#### ***tert*-Butyl (6-methoxy-1H-indazol-5-yl)carbamate**

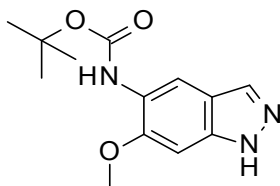

4.0 g (24.5 mmol) of 6-methoxy-1H-indazol-5-amine (CAS Number 749223-61-8) were dissolved in 30 mL of THF and 5.35 g (24.5 mmol) of di-*tert*-butyl dicarbonate were added. The reaction mixture was stirred at 25 °C for 18 h, concentrated, and the residue was suspended in 20 mL of DCM. 200 mL of hexane were added and the resulting suspension was stirred in an ice bath for 25 minutes. The precipitate was filtered off with suction, washed twice with 25 mL of hexane and dried. This gave 4.83 g (75% yield) of the title compound.

MS (ESIpos):  $m/z = 264$  (M+H)<sup>+</sup>

<sup>1</sup>H NMR (CHLOROFORM-*d*, 400 MHz)  $\delta$  1.56 (s, 9H), 3.95 (s, 3H), 6.88 (s, 1H), 7.12 (br. s., 1H), 7.94 (d, 1H,  $J=0.76$  Hz), 8.40 (br. s., 1H).

### Intermediate 23-b

#### **Benzyl {5-[(*tert*-butoxycarbonyl)amino]-6-methoxy-2H-indazol-2-yl}acetate**

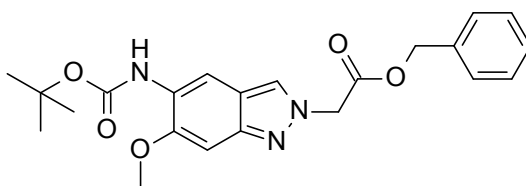

4.17 g (15.8 mmol) of *tert*-butyl (6-methoxy-1H-indazol-5-yl)carbamate in 50 mL of THF were stirred with 2.51 mL (15.8 mmol) of benzyl bromoacetate and 3.36 mL (15.8 mmol) of *N,N*-dicyclohexylmethylamine at 65 °C for 4 h, 2.51 mL (15.8 mmol) of benzyl bromoacetate and 3.36 mL (15.8 mmol) of *N,N*-dicyclohexylmethylamine were then added and the mixture was stirred at 65 °C for a further 18 h. Work-up was performed as described for the synthesis of intermediate 7-b. Purification by column chromatography was then performed using the Isolera<sup>®</sup> flash purification system (Biotage) (mobile phase: hexane/ethyl acetate) and gave 3.22 g (47% yield) of the title compound.

MS (ESIpos):  $m/z = 412 (M+H)^+$

$^1\text{H NMR}$  ( $\text{DMSO-d}_6$ , 500 MHz)  $\delta$  1.47 (s, 9H), 3.86 (s, 3H), 5.20 (s, 2H), 5.37 (s, 2H), 6.97 (s, 1H), 7.28–7.42 (m), 7.79 (s, 1H), 7.94 (br. s., 1H), 8.21 (s, 1H).

### **Intermediate 23-c**

#### **{5-[(*tert*-Butoxycarbonyl)amino]-6-methoxy-2H-indazol-2-yl}acetic acid**

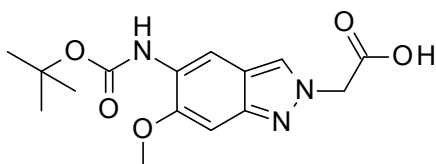

1.13 g (26.8 mmol) lithium hydroxide hydrate in 10 mL water were added to 937 mg (2.68 mmol) benzyl {5-[(*tert*-butoxycarbonyl)amino]-6-methoxy-2H-indazol-2-yl}acetate in 20 mL THF and 1.5 mL ethanol and the mixture was stirred at rt overnight. Water was added and then aqueous citric acid solution (10% citric acid) was added until a pH of 4 was reached. A small amount of ethyl acetate was added and the resulting solid was filtered off, washed two times with water and three times with diethylether, and dried to afford 548 mg of the title compound.

$^1\text{H NMR}$  ( $\text{DMSO-d}_6$ , 500 MHz)  $\delta$  1.47 (s, 9H), 3.86 (s, 3H), 5.16 (s, 2H), 6.96 (s, 1H), 7.78 (s, 1H), 7.93 (br. s., 1H), 8.16 (d, 1H), 13.13 (br. s., 1H).

### **Intermediate 23-d**

#### ***tert*-butyl {6-methoxy-2-[2-(morpholin-4-yl)-2-oxoethyl]-2H-indazol-5-yl}carbamate**

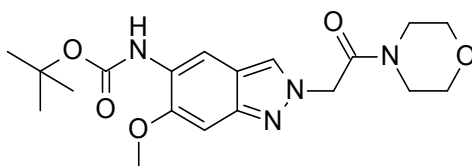

1.00 g (3.11 mmol) ({5-[(*tert*-butoxycarbonyl)amino]-6-methoxy-2H-indazol-2-yl}acetic acid and 407 mg (1.5 eq.) morpholine in 40 mL THF were treated with 477 mg (1.0 eq.) HOBt, 1.19 g (2.0 eq.) EDC, and 1.30 mL (3 eq.) TEA and the mixture was stirred for 70 h at rt. Water was added and the mixture was extracted with ethyl acetate three times. The combined organic layers were washed with brine and filtered through a water-repellent filter and concentrated to afford 1.47 g of the title compound which was used without further purification.

MS (ESIpos):  $m/z = 391 (M+H)^+$

$^1\text{H}$  NMR (300 MHz, CHLOROFORM-*d*)  $\delta$  1.55 (s, 9H) 3.58 (s, 4 ) 3.66 (s, 4H) 3.93 (s, 3H) 5.18 (s, 2H) 6.94 (s, 1H) 7.22 (s, 1H) 7.81 - 7.90 (m, 1H) 8.25 (s, 1H)

### **Intermediate 23-e**

#### **2-(5-Amino-6-methoxy-2H-indazol-2-yl)-1-(morpholin-4-yl)ethanone**

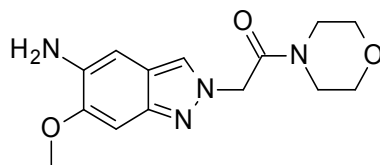

2.87 mL (10 eq.) TFA were added to 1.47 g (3.73 mmol) *tert*-butyl {6-methoxy-2-[2-(morpholin-4-yl)-2-oxoethyl]-2H-indazol-5-yl}carbamate in 15 mL DCM and the mixture was stirred at rt for 15.5 h and concentrated. Toluene was added and was removed a total of three times, affording 2.43 g of a residue that was purified by HPLC (method, table S7), affording 670 mg (62% yield) of the title compound.



**Table S7. HPLC methodology.**

|                     |                                                                                                      |
|---------------------|------------------------------------------------------------------------------------------------------|
| <i>HPLC system:</i> | Waters autopurification system: Pump 254, Sample Manager 2767, CFO,<br>DAD 2996, ELSD 2424, SQD 3100 |
| <i>Column:</i>      | XBrigde C18 5µm 100x30 mm                                                                            |
| <i>Solvent:</i>     | A = water+0.2% Vol. NH <sub>3</sub> (32%)<br>B = methanol                                            |
| <i>Gradient:</i>    | 0-8 min 5-30% B                                                                                      |
| <i>Flow:</i>        | 70 mL/min                                                                                            |
| <i>temperature:</i> | RT                                                                                                   |
| <i>Detection:</i>   | DAD scan range 210–400 nm<br>MS ESI+, ESI-, scan range 160-1000 m/z<br>ELSD                          |

<sup>1</sup>H NMR (DMSO-d<sub>6</sub>, 400 MHz) δ 7.75 (s, 1H), 6.78 (s, 1H), 6.62 (s, 1H), 5.24 (s, 2H), 4.60 (br s, 2H), 3.81 (s, 3H), 3.5–3.6 (m, 6H), 3.4–3.5 (m, 2H).

**Compound 23 and Compound 24 (step 23/24-f)**

**N-[6-Methoxy-2-(2-morpholino-2-oxo-ethyl)indazol-5-yl]-6-[(1*R*)-2,2,2-trifluoro-1-hydroxy-ethyl]pyridine-2-carboxamide (compound 23)**

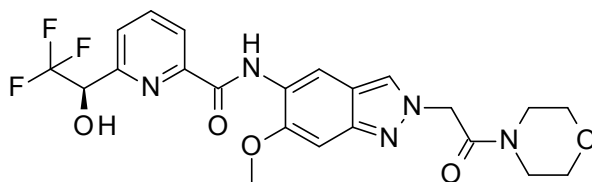

**N-[6-Methoxy-2-(2-morpholino-2-oxo-ethyl)indazol-5-yl]-6-[(1*S*)-2,2,2-trifluoro-1-hydroxy-ethyl]pyridine-2-carboxamide (compound 24)**

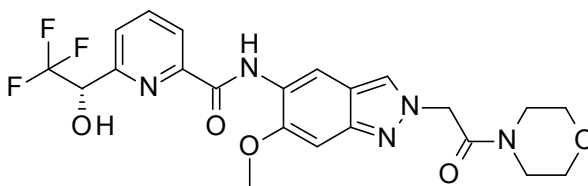

200 mg (0.689 mmol) 2-(5-amino-6-methoxy-2H-indazol-2-yl)-1-(morpholin-4-yl)ethanone and 238 mg (potassium 6-(2,2,2-trifluoro-1-hydroxyethyl)pyridine-2-carboxylate) in 5.0 mL THF were treated with 105 mg (1.0 eq.) HOBt, 264 mg (2.0 eq.) EDC, and 0.57 mL (6.0 eq.) TEA and the mixture was stirred for 17 h at rt. After the addition of water, the mixture was extracted three times with ethylacetat and the combined organic layers were evaporated. Chiral HPLC purification (methods see Table S8 and Table S9) afforded 70.0 mg (compound **24**) and 59.0 mg (compound **23**). The absolute configuration of compound **23** was determined by X-ray crystallography.

**Table S8. Chiral HPLC methodology.**

|                     |                                             |
|---------------------|---------------------------------------------|
| <i>System:</i>      | Waters: Alliance 2695, DAD 996, ESA: Corona |
| <i>Column:</i>      | Chiralpak IC 5 $\mu$ m 150x4.6 mm           |
| <i>Solvent:</i>     | Ethanol / Methanol 50:50 (v/v)              |
| <i>Flow:</i>        | 1.0 mL/min                                  |
| <i>Temperature:</i> | 25 °C                                       |
| <i>Solution:</i>    | 1.0 mg/mL EtOH/MeOH 1:1                     |
| <i>Injection:</i>   | 5.0 $\mu$ L                                 |
| <i>Detection:</i>   | DAD 280 nm                                  |

**Table S9. Chiral HPLC methodology (Preparation).**

|                     |                                                                                             |             |              |
|---------------------|---------------------------------------------------------------------------------------------|-------------|--------------|
| <i>System:</i>      | Agilent: Prep 1200, 2xPrep Pump, DLA, MWD, Gilson: Liquid Handler 215                       |             |              |
| <i>Column:</i>      | Chiralpak IC 5 $\mu$ m 250x30 mm                                                            |             |              |
| <i>Solvent:</i>     | Ethanol / Methanol 50:50 (v/v)                                                              |             |              |
| <i>Flow:</i>        | 35 mL/min                                                                                   |             |              |
| <i>Temperature:</i> | RT                                                                                          |             |              |
| <i>Solution:</i>    | 401 mg / 8 mL DCM/MeOH                                                                      |             |              |
| <i>Injection:</i>   | 10 x 0.8 mL                                                                                 |             |              |
| <i>Detection:</i>   | UV 280 nm                                                                                   |             |              |
| Compound            | Rt in min                                                                                   | Purity in % | Amount in mg |
| <b>24</b>           | 8.0–8.7                                                                                     | 98.8        | 70           |
| <b>23</b>           | 10.1–11.1                                                                                   | 99.1        | 59           |
| <i>Workup:</i>      | Fractions were evaporated, treated with <i>t</i> -BuOH, cooled to -65 °C, and freeze-dried. |             |              |

NMR data for compound **23**:

<sup>1</sup>H NMR (DMSO-*d*<sub>6</sub>, 300 MHz)  $\delta$  3.4–3.5 (m, 2H), 3.5–3.7 (m, 6H), 3.97 (s, 3H), 5.3–5.4 (m, 1H), 5.39 (s, 2H), 7.08 (s, 1H), 7.29 (d, 1H, *J*=6.2 Hz), 7.91 (t, 1H, *J*=4.4 Hz), 8.2–8.2 (m, 3H), 8.66 (s, 1H), 10.69 (s, 1H).

## Synthesis of compound 25

### Compound 25 (step 25-a)

**6-(1-Hydroxyethyl)-N-{6-methoxy-2-[2-(morpholin-4-yl)-2-oxoethyl]-2H-indazol-5-yl}pyridine-2-carboxamide**

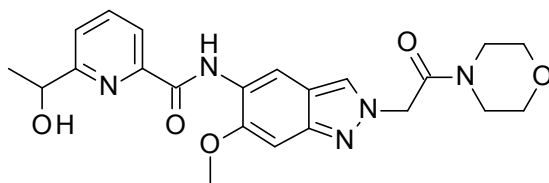

200 mg (689  $\mu\text{mol}$ ) 2-(5-amino-6-methoxy-2H-indazol-2-yl)-1-(morpholin-4-yl)ethanone (intermediate 23-e) and 212 mg (crude, ap. 1.5 eq.) potassium 6-(1-hydroxyethyl)pyridine-2-carboxylate (prepared by the reaction of methyl 6-(1-hydroxyethyl)pyridine-2-carboxylate with potassium hydroxide at 50 °C and subsequent evaporation of solvent) in 5.0 mL THF were treated with 105 mg (1.5 eq.) HOBt, 264 mg (2.0 eq.) EDC, and 0.58 mL (6.0 eq.) TEA and the mixture was stirred at rt for 18 h. Water and a small amount of ethyl acetate were added. The resulting solid was filtered off, washed two times with water, three times with diethylether, and dried to afford 205 mg (64% yield) of the title compound.

LC-MS (method A): Rt = 0.85 min; MS (ESIpos): m/z = 440 [M+H]<sup>+</sup>

<sup>1</sup>H NMR (DMSO-d<sub>6</sub>, 300 MHz)  $\delta$  1.51 (d, 3H, J=6.6 Hz), 3.4–3.5 (m, 2H), 3.5–3.7 (m, 6H), 3.99 (s, 3H), 4.8–4.9 (m, 1H), 5.38 (s, 2H), 5.58 (d, 1H, J=4.9 Hz), 7.09 (s, 1H), 7.8–7.8 (m, 1H), 8.0–8.1 (m, 2H), 8.20 (s, 1H), 8.68 (s, 1H), 10.78 (s, 1H).

## Synthesis of compound 26

### Intermediate 26-a

#### **Benzyl [5-({[6-(2-hydroxypropan-2-yl)pyridin-2-yl]carbonyl}amino)-6-methoxy-2H-indazol-2-yl]acetate**

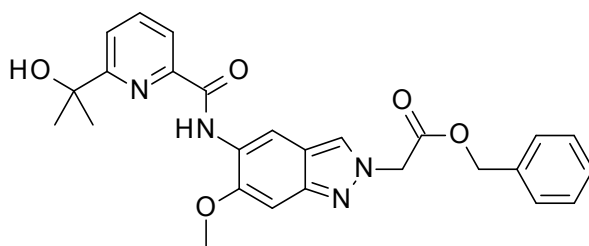

300 mg (0.96 mmol) of benzyl (5-amino-6-methoxy-2H-indazol-2-yl)acetate (intermediate 22-a), 295 mg (1.16 mmol) of potassium 6-(2-hydroxypropan-2-yl)pyridine-2-carboxylate (prepared by the reaction of 535 mg methyl 6-(2-hydroxypropan-2-yl)pyridine-2-carboxylate (CAS Number 1799836-56-8) with 282 mg (2.0 eq.) potassium hydroxide in 6 mL methanol at 50 °C for 3 h and evaporation to dryness), 148 mg (0.96 mmol) of HOBt, 277 mg (1.45

mmol) of 1-(3-dimethylaminopropyl)-3-ethylcarbodiimide hydrochloride, and 403  $\mu\text{L}$  (2.89 mmol) of TEA in 10 mL of THF were stirred at 25 °C for 24 h. The reaction mixture was diluted with water and extracted three times with ethyl acetate. The combined organic phases were washed with brine and concentrated. The crude product was dissolved in 4 mL of DMSO and purified by preparative HPLC. The product fractions were lyophilized. This gave 209 mg (46% yield) of the title compound.

MS (ESIpos):  $m/z = 475$  (M+H)<sup>+</sup>

<sup>1</sup>H NMR (DMSO- $d_6$ , 300 MHz)  $\delta$  1.56 (s, 6H), 3.99 (s, 3H), 5.20 (s, 2H), 5.43 (d, 3H,  $J=17.5$  Hz), 7.12 (s, 1H), 7.3–7.4 (m, 5H), 7.93 (dd, 1H,  $J=1.4, 7.6$  Hz), 8.0–8.0 (m, 1H), 8.05 (d, 1H,  $J=7.5$  Hz), 8.32 (s, 1H), 8.68 (s, 1H), 10.93 (s, 1H).

### **Intermediate 26-b**

#### **2-[5-[[6-(1-Hydroxy-1-methyl-ethyl)pyridine-2-carbonyl]amino]-6-methoxy-indazol-2-yl]acetic acid**

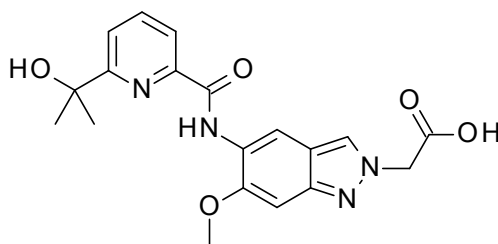

206 mg (0.43 mmol) benzyl [5-({[6-(2-hydroxypropan-2-yl)pyridin-2-yl]carbonyl}amino)-6-methoxy-2H-indazol-2-yl]acetate was suspended in 10 mL of THF and 1.0 mL of methanol, a solution of 182 mg (4.33 mmol) of lithium hydroxide monohydrate in 1.5 mL of water was then added and the mixture was stirred at 25 °C for 24 h. The mixture was diluted with water, acidified to pH 4 using aqueous citric acid solution (10% citric acid) and concentrated. The precipitated solid was filtered off, washed once with water and three times with diethylether and dried under reduced pressure. This gave 155 mg (93% yield) of the title compound.

MS (ESIpos):  $m/z = 421$  (M+H)<sup>+</sup>

<sup>1</sup>H NMR (DMSO- $d_6$ , 400 MHz)  $\delta$  1.57 (s, 6H), 3.99 (s, 3H), 5.20 (s, 2H), 5.47 (s, 1H), 7.12 (s, 1H), 7.93 (dd, 1H,  $J=7.5, 1.3$  Hz), 7.98–8.11 (m, 2H), 8.28 (s, 1H), 8.68 (s, 1H), 10.93 (s, 1H).

### **Compound 26 (step 26-c)**

#### **6-(2-Hydroxypropan-2-yl)-N-{6-methoxy-2-[2-(morpholin-4-yl)-2-oxoethyl]-2H-indazol-5-yl}pyridine-2-carboxamide**

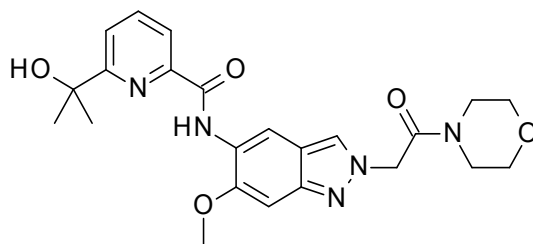

58 mg (1.0 eq.) HOBt, 144 mg (2.0 eq.) EDC, and 0.16 mL (3.0 eq.) triethylamine were added to 145 mg (0.38 mmol) 2-[5-[[6-(1-Hydroxy-1-methyl-ethyl)pyridine-2-carbonyl]amino]-6-methoxy-indazol-2-yl]acetic acid and 49 mg (1.5 eq.) morpholine in 3.0 mL THF and the mixture was stirred at rt for 67 h. Water was added, resulting in the precipitation of a solid. The solid was filtered off, washed with water, diethylether, and dried *in vacuo* affording 120 mg of the title compound.

LC-MS (method A): Rt = 0.89 min; MS (ESIpos): m/z = 454 [M+H]<sup>+</sup>

<sup>1</sup>H NMR (DMSO-d<sub>6</sub>, 400 MHz) δ 1.57 (s, 6H), 3.42–3.52 (m, 2H), 3.52–3.62 (m, 4H), 3.62–3.68 (m, 2H), 3.99 (s, 3H), 5.39 (s, 2H), 5.47 (s, 1H), 7.10 (s, 1H), 7.93 (dd, 1H, J=1.3, 7.6 Hz), 7.99–8.10 (m, 2H), 8.19–8.23 (m, 1H), 8.68 (s, 1H), 10.93 (s, 1H).

## Synthesis of compound 27

### Compound 27 (step 27-a)

#### **N-{6-Methoxy-2-[2-(morpholin-4-yl)-2-oxoethyl]-2H-indazol-5-yl}-6-[(2-methylpropyl)amino]pyridine-2-carboxamide**

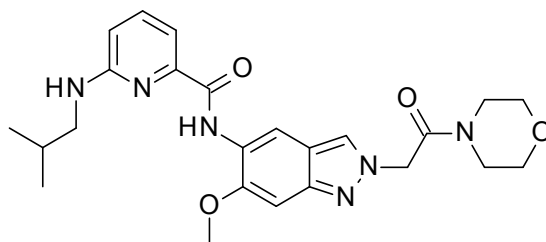

40 mg (0.17 mmol) 2-(5-amino-6-methoxy-2H-indazol-2-yl)-1-(morpholin-4-yl)ethanone (intermediate 23-e) were dissolved in 1.0 mL DMF. 53 mg (0.28 mmol) EDC, 21 mg (1.0 eq.) HOBt, 58 μL (3.0 eq.) TEA, and 32 mg 6-[(2-methylpropyl)amino]pyridine-2-carboxylic acid (crude batch) were added and the mixture was stirred at rt overnight. 10 mL water were added and aqueous workup using water and ethyl acetate led to a solid that was stirred with diethylether, filtered, and dried affording 7 mg of the title compound.

LC-MS (method A): Rt = 1.12 min; MS (ESIpos): m/z = 467 [M+H]<sup>+</sup>

<sup>1</sup>H NMR (DMSO-d<sub>6</sub>, 300 MHz) δ 1.00 (d, 6H, J=6.97 Hz), 1.84–2.02 (m, 1H), 3.25 (t, 2H, J=6.22 Hz), 3.47 (d, 2H, J=4.90 Hz), 3.52–3.72 (m, 6H), 3.99 (s, 3H), 5.38 (s, 2H), 6.75 (d, 1H, J=8.29 Hz), 6.98–7.13 (m, 2H), 7.26 (d, 1H, J=6.78 Hz), 7.57 (dd, 1H, J=8.29, 7.35 Hz), 8.19 (s, 1H), 8.70 (s, 1H), 10.75 (s, 1H).

## Synthesis of compound 28

### Compound 28 (step 28-a)

**N-{6-Methoxy-2-[2-(morpholin-4-yl)-2-oxoethyl]-2H-indazol-5-yl}-6-(morpholin-4-yl)pyridine-2-carboxamide**

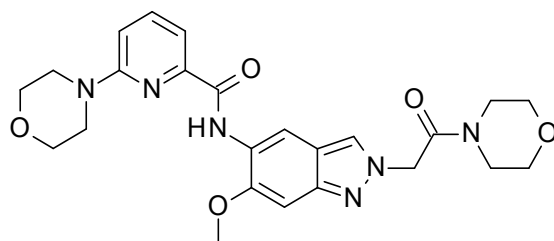

40 mg (0.17 mmol) 2-(5-amino-6-methoxy-2H-indazol-2-yl)-1-(morpholin-4-yl)ethanone (intermediate 23-e) and 43 mg (1.2 eq.) (6-(morpholin-4-yl)pyridine-2-carboxylic acid were transformed into 40 mg (83% yield) of the title compound following the same protocol used in the synthesis of compound 27.

LC-MS (method A): Rt = 0.96 min; MS (ESIpos): m/z = 481 [M+H]<sup>+</sup>

<sup>1</sup>H NMR (DMSO-d<sub>6</sub>, 400 MHz) δ 3.42–3.50 (m, 2H), 3.53–3.68 (m, 10H), 3.75–3.84 (m, 4H), 3.97 (s, 3H), 5.38 (s, 2H), 7.09 (s, 1H), 7.15 (d, 1H, J=8.3 Hz), 7.46 (d, 1H, J=7.1 Hz), 7.81 (dd, 1H, J=8.6, 7.3 Hz), 8.17–8.21 (m, 1H), 8.66 (s, 1H), 10.79 (s, 1H).

## Synthesis of compound 29

### Intermediate 29-a

**N-(6-Methoxy-1H-indazol-5-yl)-2-(tetrahydro-2H-pyran-4-yl)-1,3-oxazole-4-carboxamide**

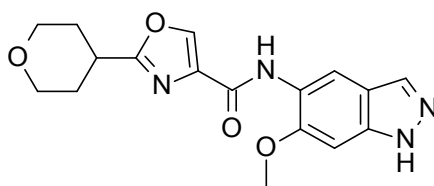

782 mg (4.80 mmol) of 6-methoxy-1H-indazole-5-amine (CAS Number 749223-61-8) and 1.04 g (5.27 mmol) of 2-(tetrahydro-2H-pyran-4-yl)-1,3-oxazole-4-carboxylic acid (CAS number 955401-82-8) were dissolved in 15 mL of THF and stirred with 734 mg (4.80 mmol) of HOBT, 1.84 g (9.59 mmol) of EDC, and 3.34 mL (24.0 mmol) of TEA at 25 °C for 26 h. Water was added, and the reaction mixture was concentrated. The resulting precipitate was filtered off with suction, washed three times with water and three times with diethyl ether, and dried in a drying cabinet. This gave 1.19 g (37% of theory) of the title compound.

MS (ESIpos):  $m/z = 343$  (M+H)<sup>+</sup>

### **Intermediate 29-b**

***tert*-Butyl [6-methoxy-5-({[2-(tetrahydro-2H-pyran-4-yl)-1,3-oxazol-4-yl]carbonyl}amino)-2H-indazol-2-yl]acetate**

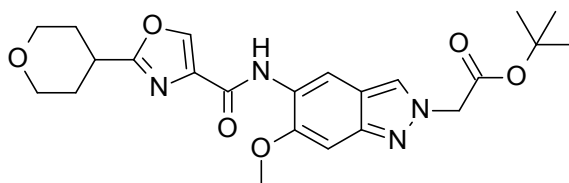

1.19 g (1.77 mmol) of *N*-(6-methoxy-1H-indazol-5-yl)-2-(tetrahydro-2H-pyran-4-yl)-1,3-oxazole-4-carboxamide were stirred with 524  $\mu$ L (3.55 mmol) of *tert*-butyl bromoacetate in 10 mL of tetrahydrofuran in the presence of 752  $\mu$ L (3.55 mmol) of *N,N*-dicyclohexylmethylamine at 70 °C for 2.5 h and at 60 °C for 17 h. 1.51 mL (9.5 mmol) of *tert*-butyl bromoacetate and 2.00 mL (9.5 mmol) of *N,N*-dicyclohexylmethylamine were added and the mixture was stirred at 70 °C for 6 h. The solid was filtered off with suction and washed three times with ethyl acetate. Water was added to the filtrate, and, after phase separation, the aqueous phase was washed once more with ethyl acetate. The combined organic phases were washed with saturated sodium chloride solution, filtered through a hydrophobic filter, and concentrated. Ethyl acetate was added to the crude product and the solid was filtered off with suction, washed three times with ethyl acetate, and dried. This gave a total of 330 mg (41% yield) of the title compound.

MS (ESIpos):  $m/z = 457$  (M+H)<sup>+</sup>



$^1\text{H}$  NMR (DMSO- $d_6$ , 500 MHz)  $\delta$  1.44 (s, 9H), 1.72–1.86 (m, 2H), 1.91–2.02 (m, 2H), 3.17–3.27 (m, 1H), 3.48 (td, 2H,  $J=2.2, 11.4$  Hz), 3.92 (dt, 2H,  $J=3.7, 11.1$  Hz), 3.97 (s, 3H), 5.18 (s, 2H), 7.10 (s, 1H), 8.26 (d, 1H), 8.57 (s, 1H), 8.74 (s, 1H), 9.41 (s, 1H).

### **Intermediate 29-c**

#### **6-Methoxy-5-({[2-(tetrahydro-2H-pyran-4-yl)-1,3-oxazol-4-yl]carbonyl}amino)-2H-indazol-2-yl]acetic acid**

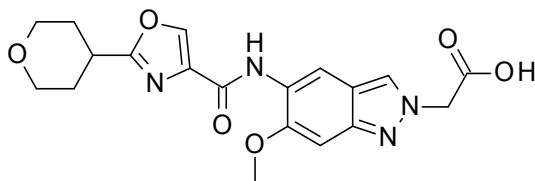

325 mg (0.71 mmol) of *tert*-butyl [6-methoxy-5-({[2-(tetrahydro-2H-pyran-4-yl)-1,3-oxazol-4-yl]carbonyl}amino)-2H-indazol-2-yl]acetate were dissolved in 5 mL of DCM and stirred with 549  $\mu\text{L}$  (7.12 mmol) of trifluoroacetic acid at 25  $^\circ\text{C}$  for 21 h. 275  $\mu\text{L}$  (3.56 mmol) of TFA were added and the mixture was stirred at 25  $^\circ\text{C}$  for 70 h. Water was added, the resulting precipitate was filtered off with suction, washed three times with water and three times with diethyl ether, and the solid was dried under reduced pressure. This gave 313 mg of the title compound (crude product, contained water).

MS (ESIpos):  $m/z = 401$  (M+H) $^+$

$^1\text{H}$  NMR (DMSO- $d_6$ , 300 MHz)  $\delta$  1.67–1.90 (m, 2H), 1.9–2.0 (m, 2H), 3.2–3.3 (m, 1H), 3.40–3.54 (m, 2H), 3.87–4.01 (m, 6H), 5.20 (s, 2H), 7.10 (s, 1H), 8.27 (s, 1H), 8.56 (s, 1H), 8.75 (s, 1H), 9.42 (s, 1H).

### **Compound 29 (step 29-d)**

#### **N-{6-Methoxy-2-[2-(morpholin-4-yl)-2-oxoethyl]-2H-indazol-5-yl}-2-(tetrahydro-2H-pyran-4-yl)-1,3-oxazole-4-carboxamide**

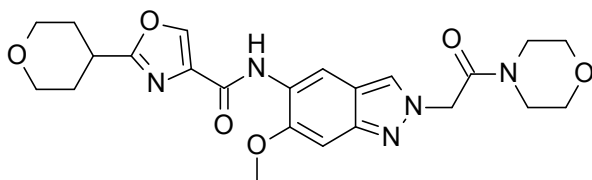

100 mg (0.25 mmol) 6-methoxy-5-({[2-(tetrahydro-2H-pyran-4-yl)-1,3-oxazol-4-yl]carbonyl}amino)-2H-indazol-2-yl]acetic acid and 44 mg (2.0 eq.) morpholine were

transformed into 65 mg (55% yield) of the title compound following the synthesis protocol of compound **27**.

LC-MS (method A): Rt = 0.88 min; MS (ESIpos): m/z = 470 [M+H]<sup>+</sup>

<sup>1</sup>H NMR (DMSO-d<sub>6</sub>, 400 MHz) δ 1.71–1.84 (m, 2H), 1.92–2.02 (m, 2H), 3.16–3.28 (m, 1H), 3.4–3.7 (m, 10H), 3.88–3.95 (m, 2H), 3.97 (s, 3H), 5.38 (s, 2H), 7.08 (s, 1H), 8.20 (s, 1H), 8.56 (s, 1H), 8.74 (s, 1H), 9.41 (s, 1H).

## Synthesis of compound **30**

### Compound 30 (step 30-a)

#### **N-[6-Methoxy-2-(3-methoxypropyl)-2H-indazol-5-yl]-6-(trifluoromethyl)pyridine-2-carboxamide**

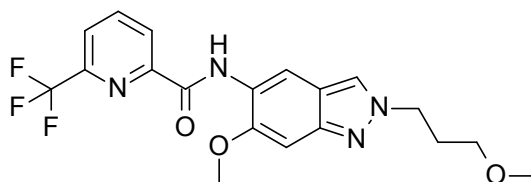

300 mg (0.60 mmol) *N*-(6-methoxy-1H-indazol-5-yl)-6-(trifluoromethyl)pyridine-2-carboxamide (intermediate 14-a) were dissolved in 4 mL DMF and 121 μL (1.07 mmol) 1-bromo-3-methoxypropane. 370 mg (2.68 mmol) potassium carbonate, and 178 mg (1.07 mmol) potassium iodide were added with stirring. After stirring for 17 h at 100 °C, the mixture was diluted with water and extracted with ethyl acetate. The combined organic layers were washed with brine, filtered with a water-repellent filter, and concentrated. The residue was purified by preparative HPLC and freeze-dried, affording 81 mg (22% yield) of the title compound.

LC-MS (method A): Rt = 1.27 min; MS (ESIpos): m/z = 409 [M+H]<sup>+</sup>

<sup>1</sup>H NMR (DMSO-d<sub>6</sub>, 500 MHz) δ 2.13 (quin, 2H, *J*=6.6 Hz), 3.24 (s, 3H), 3.99 (s, 3H), 4.40 (t, 2H, *J*=7.0 Hz), 7.16 (s, 1H), 8.21 (dd, 1H, *J*=1.0, 7.6 Hz), 8.3–8.3 (m, 1H), 8.40 (t, 1H, *J*=7.8 Hz), 8.47 (d, 1H, *J*=7.6 Hz), 8.69 (s, 1H), 10.50 (s, 1H).

## Synthesis of compound **31**

### Compound 31 (step 31-a)

## N-[2-(3-Hydroxy-3-methylbutyl)-6-methoxy-2H-indazol-5-yl]-6-(trifluoromethyl)pyridin-2-carboxamid

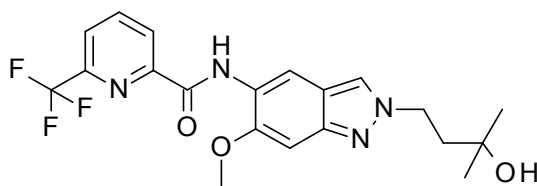

150 mg (446  $\mu\text{mol}$ ) *N*-(6-methoxy-1H-indazol-5-yl)-6-(trifluoromethyl)pyridine-2-carboxamide (intermediate 14-a) were dissolved in 4 mL DMF and 112 mg (669  $\mu\text{mol}$ ) 4-bromo-2-methylbutan-2-ol, 185 mg (1.34 mmol) potassium carbonate, and 111 mg (669  $\mu\text{mol}$ ) potassium iodide were added with stirring. After stirring of the suspension for 5.5 h at 120 °C, water was added, and the reaction mixture was extracted with ethyl acetate three times. The combined organic layers were washed with brine, filtered with a water-repellent filter and concentrated. The residue was dissolved in 2 mL DMSO, purified with preparative HPLC, and then freeze-dried, affording 41.4 mg (22% yield) of the title compound.

LC-MS (method A):  $R_t$  = 1.18 min; MS (ESIpos):  $m/z$  = 423  $[M+H]^+$

$^1\text{H}$  NMR (DMSO- $d_6$ , 400 MHz)  $\delta$  1.16 (s, 6H), 1.97–2.08 (m, 2H), 3.99 (s, 3H), 4.39–4.48 (m, 2H), 4.52 (s, 1H), 7.15 (s, 1H), 8.22 (dd, 1H,  $J=1.0, 7.6$  Hz), 8.33 (s, 1H), 8.37–8.51 (m, 2H), 8.69 (s, 1H), 10.50 (s, 1H).

## Synthesis of compound 32

### Intermediate 32-a

#### 5-Nitro-6-[(3S)-tetrahydrofuran-3-yloxy]-1H-indazole

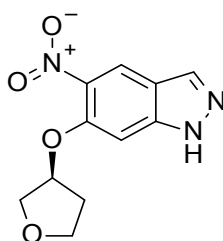

2.00 g (11.2 mmol) 5-nitro-1H-indazol-6-ol, 940  $\mu\text{L}$  (12 mmol) (3S)-tetrahydrofuran-3-ol and 4.39 g (16.7 mmol) triphenylphosphine in 25 mL THF were treated with 3.2 mL (17 mmol) diisopropylazodicarboxylate dropwise and the mixture was stirred at 25 °C for 67 h. The

mixture was concentrated and purified using flash chromatography (Biotage SNAP cartridge (100 g; KP-Sil), eluent: hexane-ethyl acetate), affording 3.08 g of the title compound (crude batch).

MS (ESIpos):  $m/z = 250 [M+H]^+$

### **Intermediate 32-b**

#### **2-Methyl-4-{5-nitro-6-[(3S)-tetrahydrofuran-3-yloxy]-2H-indazol-2-yl}butan-2-ol**

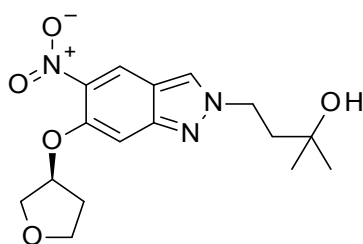

3.08 g of 5-nitro-6-[(3S)-tetrahydrofuran-3-yloxy]-1H-indazole (crude batch) dissolved in 50 mL of DMF were treated with 3.84 g (27.8 mmol) of potassium carbonate, after which 4.55 g of (crude batch) 3-hydroxy-3-methylbutyl-4-methylbenzolsulfonate were added. After stirring for 22 h at 80 °C, the mixture was diluted with water and extracted with ethyl acetate three times. The combined organic layers were washed with brine, filtered using a water-repellent filter, and evaporated. The residue was purified with flash-chromatography (Biotage SNAP cartridge, 100 g; KP-Sil, eluent hexane-ethyl acetate) affording 618 mg of the title compound (crude batch).

### **Intermediate 32-c**

#### **4-{5-Amino-6-[(3S)-tetrahydrofuran-3-yloxy]-2H-indazol-2-yl}-2-methylbutan-2-ol**

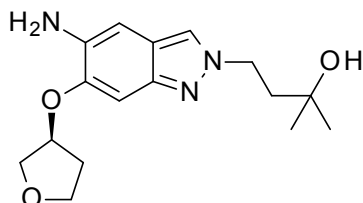

610 mg 2-methyl-4-{5-nitro-6-[(3S)-tetrahydrofuran-3-yloxy]-2H-indazol-2-yl}butan-2-ol dissolved in 10 mL ethanol and 3 mL water. Then, 843 mg (15.1 mmol) iron powder and 40 mg ammonium chloride were added and the mixture was stirred for 5 h at 90 °C. The mixture was cooled and filtered with Celite®. The filtrate was evaporated and the residue was treated

with THF. The mixture was then filtered and the filtrate was evaporated. The residue was dissolved in 2 mL DMF and purified by preparative HPLC affording 348 mg of a crude product. MS (ESIpos):  $m/z = 305 [M+H]^+$ .

### **Compound 32 (step 32-d)**

#### **N-{2-(3-Hydroxy-3-methylbutyl)-6-[(3S)-tetrahydrofuran-3-yloxy]-2H-indazol-5-yl}-6-(trifluoromethyl)pyridine-2-carboxamide**

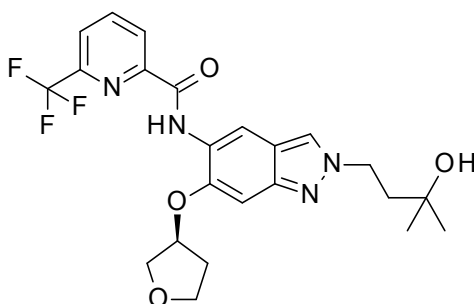

116 mg (379  $\mu\text{mol}$ ) 4-{5-amino-6-[(3S)-tetrahydrofuran-3-yloxy]-2H-indazol-2-yl}-2-methylbutan-2-ol, 87.0 mg (455  $\mu\text{mol}$ ) 6-(trifluoromethyl)pyridine-2-carboxylic acid, 173 mg (455  $\mu\text{mol}$ ) HATU, and 79  $\mu\text{L}$  (460  $\mu\text{mol}$ ) DIPEA were dissolved in 2 mL THF. After stirring for 16.5 h at 25 °C, the mixture was diluted with water and extracted with ethyl acetate three times. The combined organic layers were washed with brine, filtered with a water-repellent filter, and concentrated. The residue was dissolved in 2 mL DMF, purified using preparative HPLC and freeze-dried, affording 105 mg of the title compound.

LC-MS (method C):  $R_t = 1.15$  min; MS (ESIpos):  $m/z = 479 [M+H]^+$

$^1\text{H}$  NMR (DMSO- $d_6$ , 400 MHz)  $\delta$  1.16 (s, 6H), 1.97–2.06 (m, 2H), 2.10–2.21 (m, 1H), 2.31–2.43 (m, 1H), 3.83–3.98 (m, 3H), 4.06 (dd, 1H,  $J=4.6, 10.4$  Hz), 4.39–4.46 (m, 2H), 4.54 (s, 1H), 7.12 (s, 1H), 8.22 (dd, 1H,  $J=1.3, 7.6$  Hz), 8.33 (s, 1H), 8.38–8.49 (m, 2H), 8.73 (s, 1H), 10.63 (s, 1H).

### **Synthesis of compound 33**

#### **Intermediate 33-a**

#### **Methyl 2-(3-methoxypropyl)-5-({[6-(trifluoromethyl)pyridin-2-yl]carbonyl}amino)-2H-indazole-6-carboxylate**

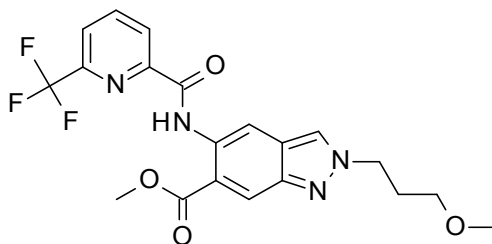

1.00 g (2.75 mmol) methyl 5-({[6-(trifluoromethyl)pyridin-2-yl]carbonyl}amino)-1H-indazole-6-carboxylate **V** (synthesis described in main manuscript) was dissolved in 5 mL of DMF, and 460  $\mu$ L (4.12 mmol) of 1-bromo-3-methoxypropane, 1.14 g (8.23 mmol) of potassium carbonate, and 228 mg (1.37 mmol) of potassium iodide were added while stirring. The reaction mixture was stirred at 25 °C for 72 h, diluted with water, and extracted twice with ethyl acetate. The combined organic phases were filtered through a hydrophobic filter and concentrated. The residue was purified using column chromatography on silica gel (hexane/ethyl acetate). 28 mg (2% yield) of a pure batch of the title compound was obtained. MS (ESIpos):  $m/z = 437$  (M+H)<sup>+</sup>

<sup>1</sup>H NMR (DMSO-*d*<sub>6</sub>, 400 MHz)  $\delta$  2.17 (quin, 2H,  $J=6.6$  Hz), 3.24 (s, 3H), 3.33–3.36 (m, 2H), 3.96 (s, 3H), 4.53 (t, 2H,  $J=7.0$  Hz), 8.21 (dd, 1H,  $J=7.7, 0.9$  Hz), 8.35–8.42 (m, 1H), 8.45–8.49 (m, 2H), 8.54 (d, 1H,  $J=1.0$  Hz), 9.06 (s, 1H), 12.54 (s, 1H).

### **Compound 33 (step 33-b)**

#### **N-[6-(2-Hydroxypropan-2-yl)-2-(3-methoxypropyl)-2H-indazol-5-yl]-6-(trifluoromethyl)pyridine-2-carboxamide**

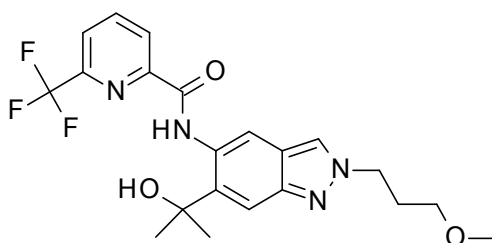

75 mg (0.17 mmol) methyl 2-(3-methoxypropyl)-5-({[6-(trifluoromethyl)pyridin-2-yl]carbonyl}amino)-2H-indazole-6-carboxylate were dissolved in 500  $\mu$ L of THF and admixed with 859  $\mu$ L (0.86 mmol) of a 1 M methylmagnesium bromide solution in THF. The reaction mixture was stirred at 25 °C for 60 min. Subsequently, 1 mL of a sat. ammonium chloride solution was added cautiously, and the mixture was filtered. The aqueous phase was extracted twice with ethyl acetate, and the organic phases were combined, filtered through a

hydrophobic filter, and concentrated. The residue was dissolved in 3 mL of DMSO and purified using preparative HPLC. The product-containing fractions were freeze-dried. 25 mg (32% yield) of the title compound were obtained.

LC-MS (method B): Rt = 1.14 min; MS (ESIpos): m/z = 437 [M+H]<sup>+</sup>

<sup>1</sup>H NMR (DMSO-d<sub>6</sub>, 400 MHz) δ 1.62 (s, 6H), 2.14 (quin, 2H, J=6.6 Hz), 3.23 (s, 3H), 3.26–3.32 (m, 2H), 4.44 (t, 2H, J=7.0 Hz), 5.95 (s, 1H), 7.58 (s, 1H), 8.16 (d, 1H, J=7.9 Hz), 8.31–8.40 (m, 2H), 8.43–8.48 (m, 1H), 8.72 (s, 1H), 12.36 (s, 1H).

## Synthesis of compound 34

### Compound 34 (step 34-a)

#### **N-[2-(1,1-Dioxothian-3-yl)-6-methoxy-indazol-5-yl]-6-(trifluoromethyl)pyridine-2-carboxamide**

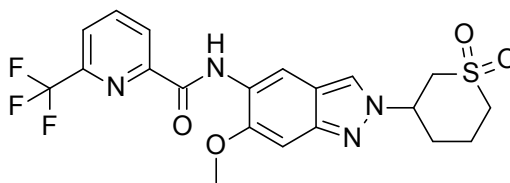

N-(6-methoxy-1H-indazol-5-yl)-6-(trifluoromethyl)pyridine-2-carboxamide (intermediate 14-a, 200 mg, 595 μmol) and 4-bromo-2H-tetrahydro-thiopyran 1,1-dioxide (190 mg, 892 μmol) were dissolved in DMF (4.0 ml, 52 mmol) and potassium carbonate (247 mg, 1.78 mmol) was added. The reaction mixture was stirred for 20 h at 100 °C. Afterwards, the reaction mixture was diluted with water and extracted three times with ethyl acetate. The combined organic extracts were washed with brine, filtered over a water-free filter, and concentrated *in vacuo*. The residue was diluted with 5.5 mL DMSO / acetonitrile and purified using preparative HPLC to afford 70.2 mg (23% yield, 90% NMR purity) of the title compound.

LC-MS (method A): Rt = 1.27 min; MS (ESIpos): m/z = 469 [M+H]<sup>+</sup>

<sup>1</sup>H NMR (DMSO-d<sub>6</sub>, 500 MHz) δ 1.89–2.03 (m, 1H), 2.15–2.23 (m, 3H), 2.52 (d, 1H, J=1.91 Hz), 3.15–3.20 (m, 1H), 3.26–3.30 (m, 1H), 3.63 (dt, 1H, J=13.35, 3.50 Hz), 3.76–3.83 (m, 1H), 3.99 (s, 3H), 4.89–5.00 (m, 1H), 7.16 (s, 1H), 8.21 (dd, 1H, J=7.95, 0.95 Hz), 8.38–8.41 (m, 1H), 8.42 (d, 1H, J=0.95 Hz), 8.45–8.48 (m, 1H), 8.70 (s, 1H).

## Synthesis of compound 35

### Intermediate 35-a

#### 5-fluoro-2,4-dinitroaniline

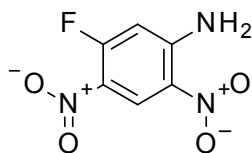

1,5-difluoro-2,4-dinitrobenzene (9.58 g, 46.9 mmol) was dissolved in THF (48 ml, 590 mmol) and ammonium hydroxide (3.7 ml, 94 mmol) was added. The reaction mixture was stirred for 72 h at 25 °C. Additional ammonium hydroxide (1.8 ml, 47 mmol) was added and the mixture was stirred for 1 h at 25 °C. Afterwards, the reaction mixture was partly concentrated *in vacuo* and diluted with water. After stirring for 5 minutes, the formed suspension was filtered, washed with hexane, and dried to afford 8.85 g (94% yield) of the title compound.

LC-MS (method B): Rt = 0.89 min; MS (ESI<sup>neg</sup>): m/z = 200 [M-H]<sup>-</sup>

<sup>1</sup>H NMR (DMSO-d<sub>6</sub>, 400 MHz) δ 6.89 (d, 1H, J=13.94 Hz), 8.22-8.66 (m, 2H), 8.82 (d, 1H, J=8.11 Hz).

### Intermediate 35-b

#### 5-Methoxy-2,4-dinitroaniline

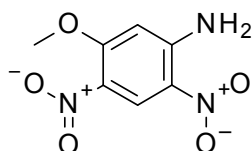

5-Fluoro-2,4-dinitroaniline (8.94 g, 44.5 mmol) was dissolved in THF (89 ml, 1.1 mol) and methanol (89 ml, 2.2 mol) and sodium hydroxide solution (44 ml, 1.0 M, 44 mmol) was added. The reaction mixture was stirred for 30 minutes at 25 °C and concentrated *in vacuo*. The residue was triturated with water and the resulting suspension was filtrated, washed with hexane, and dried to afford 9.17 g (97% yield) of the title compound.

LC-MS (method B): Rt = 0.89 min; MS (ESI<sup>pos</sup>): m/z = 214 [M+H]<sup>+</sup>

<sup>1</sup>H NMR (DMSO-d<sub>6</sub>, 400 MHz) δ 3.91 (s, 3H), 6.65 (s, 1H), 8.14 (br s, 2H), 8.73 (s, 1H).

### Intermediate 35-c



#### 4-Methoxy-5-nitrobenzene-1,2-diamine

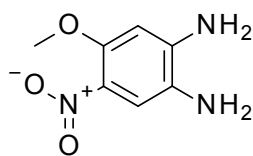

Sodium sulfide nonahydrate (25.6 g, 106 mmol) was dissolved in water (71 ml) and sodium hydrogencarbonate (8.49 g, 101 mmol) was slowly added. After 10 minutes of stirring, methanol (71 ml, 1.8 mol) was added. The formed suspension was stirred at 0 °C for additional 10 minutes before filtration. The filter cake was washed with additional methanol (23 ml, 560 mmol) and the combined filtrate was slowly added to a preformed solution of 5-methoxy-2,4-dinitroaniline (8.07 g, 37.9 mmol) in THF (19 ml, 230 mmol) and methanol (38 ml, 940 mmol). The resulting reaction mixture was stirred for 1 h at 70 °C and then cooled to 0 °C. After stirring for 20 minutes, the formed solid was filtered off, washed with ethyl acetate, and dried, affording an initial yield of the crude product. The filtrate was concentrated *in vacuo* and triturated with a 1:1 mixture of ethyl acetate and water. The resulting suspension was filtered, washed with ethyl acetate, and dried to afford a second portion of the crude product. The combined product fractions were purified by Biotage Isolera™ chromatography (SNAP KP-Sil – 340 g, eluting with hexane-ethyl acetate, 1:0 to 1:9) to afford 2.85 g (16% yield) of the title compound.

LC-MS (method B): Rt = 0.54 min; MS (ESIpos): m/z = 184 [M+H]<sup>+</sup>

<sup>1</sup>H NMR (DMSO-d<sub>6</sub>, 400 MHz) δ 3.74 (s, 3H), 4.61 (br s, 2H), 6.12 (s, 2H), 6.29 (s, 1H), 7.28 (s, 1H).

#### **Intermediate 35-d**

#### **N-(2-Amino-5-methoxy-4-nitro-phenyl)-1,1-dioxo-thiane-3-carboxamide**

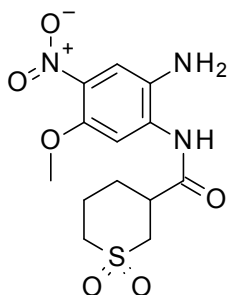

4-Methoxy-5-nitrobenzene-1,2-diamine (2.75 g, 15.0 mmol) and 1,1-dioxo-1λ6-thiane-3-carboxylic acid (2.67 g, 15.0 mmol) were dissolved in THF (93 ml, 1.2 mol) and TEA (3.1

ml, 22 mmol) and HATU (8.55 g, 22.5 mmol) was added. The reaction mixture was stirred for 24 h at 25 °C. The reaction mixture was concentrated *in vacuo* and triturated with water. The resulting suspension was collected by filtration and washed with water. The filter cake was taken up in a 2:1 mixture of ethyl acetate and water and basified to pH 9 with sat. sodium bicarbonate solution. The precipitate obtained was collected by filtration and washed with water and ethyl acetate. The resulting filter cake was again taken up in sat. sodium bicarbonate solution and diluted with water. The precipitate obtained was collected by filtration, washed with water, and dried to afford 4.14 g (81% yield) of the title compound.

LC-MS (method B): Rt = 0.62 min; MS (ESIpos): m/z = 344 [M+H]<sup>+</sup>

<sup>1</sup>H NMR (DMSO-d<sub>6</sub>, 400 MHz) δ 1.62 (qd, 1H, J=12.84, 3.30 Hz), 1.80–1.88 (m, 1H), 2.02 (br dd, 1H, J=13.31, 2.41 Hz), 2.08–2.17 (m, 1H), 2.98–3.10 (m, 2H), 3.13–3.24 (m, 3H), 3.82 (s, 3H), 6.39 (s, 1H), 6.46 (br s, 2H), 7.92 (s, 1H), 9.30 (br s, 1H).

### **Intermediate 35-e**

#### **3-(5-Methoxy-6-nitro-1H-benzimidazol-2-yl)thiane 1,1-dioxide**

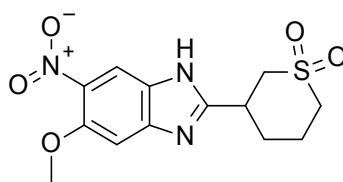

N-(2-Amino-5-methoxy-4-nitro-phenyl)-1,1-dioxo-thiane-3-carboxamide (4.14 g, 12.1 mmol) was dissolved in acetic acid (31 ml) and stirred for 24 h at 90 °C. Additional acetic acid (51 ml) was added and the mixture was stirred at 90 °C for a further 24 h. The reaction mixture was then concentrated *in vacuo*. Toluene was added and *in vacuo* concentration continued. After two repetitions, the product was dried to afford 4.21 g (crude) of the title compound.

LC-MS (method B): Rt = 0.64 min; MS (ESIpos): m/z = 326 [M+H]<sup>+</sup>

<sup>1</sup>H NMR (DMSO-d<sub>6</sub>, 400 MHz) δ 1.75–2.01 (m, 2H), 2.12–2.22 (m, 2H), 3.10–3.27 (m, 3H), 3.45–3.51 (m, 2H), 3.92 (s, 3H), 7.33 (s, 1H), 8.10 (s, 1H).

### **Intermediate 35-f**

#### **2-(1,1-Dioxothian-3-yl)-6-methoxy-3H-benzimidazol-5-amine**

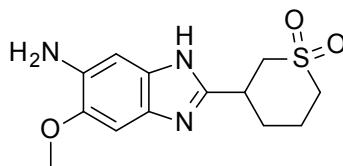

3-(5-Methoxy-6-nitro-1H-benzimidazol-2-yl)thiane 1,1-dioxide (4.16 g, 12.8 mmol) was dissolved in ethanol (87 ml, 1.5 mol) and palladium on charcoal (2.82 g, 10 % Pd, 3.20 mmol) and ammonium formate (4.03 g, 100 % purity, 63.9 mmol) were added. The reaction mixture was stirred for 30 minutes at 60 °C. Afterwards, palladium on charcoal was removed by filtration and washed with ethyl acetate. The filtrate was concentrated *in vacuo* and the residue was partitioned using ethyl acetate and water. After phase separation and a second extraction with ethyl acetate, the combined organic layers were washed with brine, dried over anhydrous magnesium sulfate, filtered, and concentrated *in vacuo*. The aqueous layer was brought to pH 9 using sat. sodium bicarbonate solution and extracted with ethyl acetate. After drying over anhydrous magnesium sulfate and filtration, the filtrate was concentrated *in vacuo*. The combined crude product fractions were triturated with ethyl acetate in an ultrasonic bath for 20 minutes. After filtration, the product was triturated with acetonitrile in an ultrasonic bath. The product was again collected by filtration and dried to afford 1.54 g (41% yield) of the title compound.

LC-MS (method B): Rt = 0.60 min; MS (ESIpos): m/z = 296 [M+H]<sup>+</sup>

<sup>1</sup>H NMR (DMSO-d<sub>6</sub>, 400 MHz) δ 1.68–1.81 (m, 1H), 1.89–1.98 (m, 1H), 2.10–2.18 (m, 2H), 3.06–3.13 (m, 1H), 3.14–3.24 (m, 1H), 3.36–3.43 (m, 3H), 3.76 (s, 3H), 4.58 (br s, 2H), 6.66 (s, 1H), 6.96 (s, 1H), 11.66 (s, 1H).

### **Compound 35 (step 35-g)**

**N-[2-(1,1-Dioxothian-3-yl)-6-methoxy-3H-benzimidazol-5-yl]-6-(trifluoromethyl)pyridine-2-carboxamide**

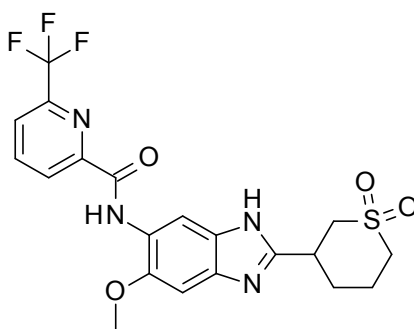

2-(1,1-Dioxothian-3-yl)-6-methoxy-3H-benzimidazol-5-amine (1.27 g, batch contained impurities), 6-(trifluoromethyl)pyridine-2-carboxylic acid (411 mg, 2.15 mmol), and HATU (1.23 g, 3.22 mmol) were dissolved in DMF (9.5 ml, 260 mmol) and TEA (450  $\mu$ L, 3.2 mmol) was added. The reaction mixture was stirred for 24 h at 25  $^{\circ}$ C and then diluted with water. The precipitate obtained was collected by filtration, washed with water, and dried. The crude product was dissolved in acetonitrile and concentrated *in vacuo*. The residue was diluted with DMSO and purified using preparative HPLC. The product fractions were pooled and concentrated *in vacuo* to afford 518 mg of the title compound.

LC-MS (method B): Rt = 1.05 min; MS (ESIpos): m/z = 469 [M+H]<sup>+</sup>

<sup>1</sup>H NMR (DMSO-d<sub>6</sub>, 400 MHz)  $\delta$  1.11 (s, 3H), 1.74–1.89 (m, 1H), 1.89–2.03 (m, 1H), 2.11–2.24 (m, 2H), 3.08–3.16 (m, 1H), 3.18–3.28 (m, 1H), 3.41–3.53 (m, 3H), 3.91 – 4.00 (m, 3H), 7.16 (s, 0.43H) +7.33 (s, 0.57H), 8.22 (d, J=7.86 Hz, 1H), 8.36–8.43 (m, 1H), 8.44–8.49 (m, 1H), 8.53–8.63 (m, 1H), 10.41 (s, 0.45H), 10.51 (0.6H), 12.28 (br s), rotamers present.

## Synthesis of compound 36

### Intermediate 36-a

#### 5-Chloro-2-methoxy-4-nitroaniline

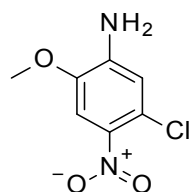

2-Amino-4-chloro-5-nitrophenol (51.3 g, 272 mmol) and iodomethane (17 ml, 270 mmol; CAS Number 74-88-4) were dissolved in DMF (990 ml) and potassium carbonate (56.4 g, 408 mmol) was added. The reaction mixture was stirred for 1 h at 25  $^{\circ}$ C and subsequently concentrated *in vacuo*. The residue was suspended in water and stirred for 30 minutes. After filtration and washing with water, the crude product was dissolved in a 10:7 mixture of ethyl acetate and water, dried over anhydrous magnesium sulfate, filtered, and concentrated *in vacuo* to afford 49.4 g (90% yield) of the title compound.

LC-MS (method B): Rt = 0.98 min; MS (ESIpos): m/z = 203 [M+H]<sup>+</sup>

<sup>1</sup>H NMR (DMSO-d<sub>6</sub>, 400 MHz)  $\delta$  3.87 (s, 3H), 6.53 (s, 2H), 6.73 (s, 1H), 7.57 (s, 1H).

## **Intermediate 36-b**

### ***tert*-Butyl (5-chloro-2-methoxy-4-nitrophenyl)carbamate**

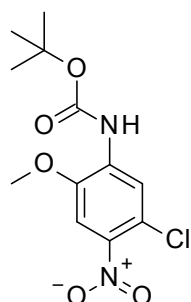

5-Chloro-2-methoxy-4-nitroaniline (49.4 g, 244 mmol), di-*tert*-butyl dicarbonate (63.9 g, 293 mmol), and 4-dimethylaminopyridine (238 mg, 1.95 mmol) were dissolved in DCM (490 ml). The reaction mixture was stirred for 4 h at 45 °C and for 20 h at 25 °C and concentrated *in vacuo*. The crude product (81.2 g) was directly used in the next step.

LC-MS (method A): Rt = 1.45 min; MS (ESI<sup>neg</sup>): m/z = 301 [M-H]<sup>-</sup>

<sup>1</sup>H NMR (DMSO-d<sub>6</sub>, 400 MHz) δ 1.48 (s, 9H), 3.90 (s, 3H), 7.73 (s, 1H), 8.14 (s, 1H), 8.78 (br s, 1H).

## **Intermediate 36-c**

### ***tert*-Butyl [2-methoxy-5-(methylamino)-4-nitrophenyl]carbamate**

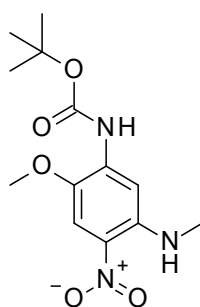

*tert*-Butyl (5-chloro-2-methoxy-4-nitrophenyl)carbamate (15.9 g, 52.5 mmol) was dissolved in methanamine in ethanol (160 ml, 1.8 mol) and the reaction mixture was stirred for 24 h at 70 °C. After concentration *in vacuo* the residue was purified using Biotage Isolera™ chromatography (SNAP KP-Sil – 1500 g, eluting with DCM) to afford 8.40 g (54% yield) of the title compound.

LC-MS (method B): Rt = 1.34 min; MS (ESI<sup>pos</sup>): m/z = 298 [M+H]<sup>+</sup>

$^1\text{H}$  NMR (DMSO- $d_6$ , 400 MHz)  $\delta$  1.49 (s, 9H), 2.94 (d, 3H,  $J=4.82$  Hz), 3.81 (s, 3H), 7.49 (s, 1H), 7.61 (s, 1H), 8.35 (s, 1H), 8.36–8.40 (m, 1H).

### **Intermediate 36-d**

#### ***tert*-Butyl [4-amino-2-methoxy-5-(methylamino)phenyl]carbamate**

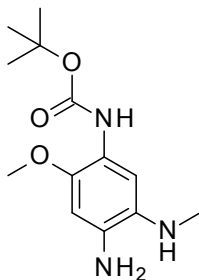

Palladium on charcoal (14.8 g, 10 % Pd content, 16.8 mmol; CAS Number 123-91-1) was flushed with argon in a three-neck flask equipped with a mechanical stirrer. Ethanol (400 ml, 6.9 mol), *tert*-butyl [2-methoxy-5-(methylamino)-4-nitrophenyl]carbamate (20.0 g, 67.3 mmol), and ammonium formate (21.2 g, 336 mmol) were added and the reaction mixture was stirred for 2 h at 60 °C. After filtration and concentration *in vacuo*, the residue was diluted with water and extracted with ethyl acetate two times. The combined organic extracts were washed with water and brine, dried over anhydrous magnesium sulfate, filtered, and concentrated *in vacuo* to afford 16.23 g (90% yield) of the title compound.

MS (ESIpos):  $m/z$  = 268  $[\text{M}+\text{H}]^+$ .

$^1\text{H}$  NMR (DMSO- $d_6$ , 400 MHz)  $\delta$  1.42 (s, 9H), 2.63 (s, 3H), 3.62 (s, 3H), 4.22 (br s, 1H), 4.39 (br d, 2H,  $J=3.55$  Hz), 6.32 (s, 1H), 6.63 (br s, 1H), 7.46 (s, 1H)

### **Intermediate 36-e**

#### ***tert*-Butyl *N*-[4-[(1,1-dioxothiane-3-carbonyl)amino]-2-methoxy-5-(methylamino)phenyl]carbamate**

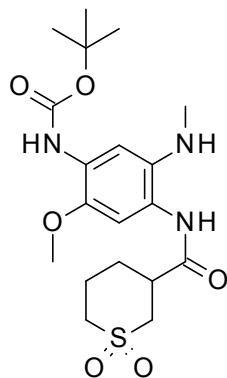

*tert*-Butyl [4-amino-2-methoxy-5-(methylamino)phenyl]carbamate (34.1 g, 80 % purity, 102 mmol) and tetrahydro-2H-thiopyran-3-carboxylic acid 1,1-dioxide (18.2 g, 102 mmol) were dissolved in DMF (650 ml) and TEA (21 ml, 150 mmol) and HATU (58.2 g, 153 mmol) was added. The reaction mixture was stirred for 1 h at 25 °C and then diluted with water. After basification to pH 8 using aqueous sodium bicarbonate solution, the resulting precipitate was collected by filtration and washed with water. The filter cake was dissolved in a 1:1 mixture of ethyl acetate and DCM, dried over anhydrous magnesium sulfate, filtered, and concentrated *in vacuo* to afford 43.9 g (98% yield) of the title compound.

MS (ESIpos):  $m/z = 428 [M+H]^+$

$^1\text{H NMR}$  (DMSO- $d_6$ , 400 MHz)  $\delta$  1.45 (s, 9H), 1.62 (qd, 1H,  $J=12.84, 3.30$  Hz), 1.76–1.91 (m, 1H), 1.96–2.04 (m, 1H), 2.07–2.18 (m, 1H), 2.65 (d, 3H,  $J=5.07$  Hz), 2.98–3.10 (m, 2H), 3.11–3.22 (m, 2H), 3.30 (br d, 1H,  $J=3.30$  Hz), 3.66 (s, 3H), 4.73 (q, 1H,  $J=4.90$  Hz), 6.87 (s, 1H), 7.06 (s, 1H), 7.71 (s, 1H), 9.17 (s, 1H).

### **Intermediate 36-f**

***tert*-Butyl *N*-[2-(1,1-dioxothian-3-yl)-6-methoxy-3-methyl-benzimidazol-5-yl]carbamate**

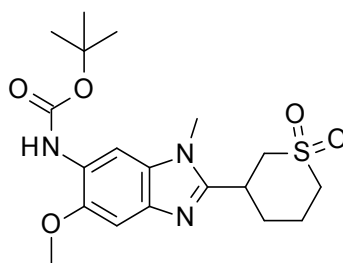

*tert*-Butyl *N*-[4-[(1,1-dioxothiane-3-carbonyl)amino]-2-methoxy-5-(methylamino)phenyl]carbamate (43.9 g, 103 mmol) was dissolved in acetic acid (270 ml) and stirred for 24 h at 40 °C. The reaction was concentrated *in vacuo* and toluene was added

to the residue. The resulting suspension was again concentrated *in vacuo*. Toluene was added twice and after each addition the mixture was concentrated. Then, the crude product was dried to afford 42.4 g (crude material) of the title compound.

<sup>1</sup>H NMR (DMSO-d<sub>6</sub>, 400 MHz) δ 1.40–1.45 (m, 1H), 1.47 (s, 9H), 1.67–1.79 (m, 1H), 1.98–2.07 (m, 1H), 2.07–2.17 (m, 1H), 3.07–3.16 (m, 1H), 3.22–3.31 (m, 1H), 3.48 (t, *J*=12.80 Hz, 1H), 3.53–3.60 (m, 1H), 3.72 (s, 3H), 3.82 (s, 3H), 7.18 (s, 1H), 7.80 (br s, 1H), 7.89 (s, 1H), 11.98 (br s, 1H).

LC-MS (method B): Rt = 1.09 min; MS (ESIpos): *m/z* = 410 [M+H]<sup>+</sup>

### **Intermediate 36-g**

#### **2-(1,1-Dioxothian-3-yl)-6-methoxy-3-methyl-benzimidazol-5-amine**

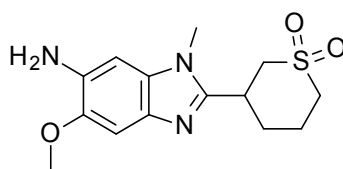

*tert*-Butyl *N*-[2-(1,1-dioxothian-3-yl)-6-methoxy-3-methyl-benzimidazol-5-yl]carbamate (42.4 g, 104 mmol) was dissolved in DCM (390 ml, 6.1 mol) and TFA (60 ml) was added. The reaction mixture was stirred for 1 h at 25 °C. More TFA (60 ml) was added and stirring continued for 1 h at 25 °C. The reaction mixture was poured into water and the pH was adjusted to 8 - 9 by the addition of sodium bicarbonate solution. After concentration *in vacuo* to remove the excess of DCM, ethyl acetate was added and the aqueous layer was extracted three times. The combined organic extracts were washed with water, brine, dried over anhydrous magnesium sulfate, filtered, and concentrated *in vacuo* to afford 5.0 g of a solid. While standing, the aqueous layer transformed into a suspension that was then filtered. The filter cake was dissolved in a 1:1 mixture of DCM and ethyl acetate, filtered, and the filtrate was concentrated *in vacuo* and dried to afford 18.6 g of solid. The two solids were combined to afford 23.6 g (74% yield) of the title compound.

<sup>1</sup>H NMR (DMSO-d<sub>6</sub>, 400 MHz) δ 1.64–1.77 (m, 1H), 1.95–2.04 (m, 2H), 2.05–2.15 (m, 1H), 3.06–3.16 (m, 1H), 3.19–3.27 (m, 1H), 3.28–3.32 (m, 1H), 3.40–3.54 (m, 2H), 3.61 (s, 3H), 3.77 (s, 3H), 4.67 (s, 2H), 6.64 (s, 1H), 6.98 (s, 1H).

LC-MS (method B): Rt = 0.63 min; MS (ESIpos): *m/z* = 310 [M+H]<sup>+</sup>

### **Compound 36 (step 36-h)**



**N-[2-(1,1-Dioxothian-3-yl)-6-methoxy-3-methyl-benzimidazol-5-yl]-6-(trifluoromethyl)pyridine-2-carboxamide**

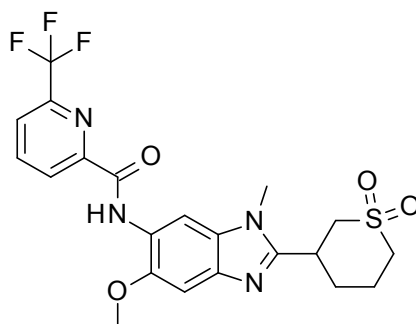

2-(1,1-Dioxothian-3-yl)-6-methoxy-3-methyl-benzimidazol-5-amine (267 mg, 604  $\mu\text{mol}$ ), 6-(trifluoromethyl)pyridine-2-carboxylic acid (115 mg, 604  $\mu\text{mol}$ ), HATU (345 mg, 906  $\mu\text{mol}$ ), and TEA (130  $\mu\text{L}$ , 910  $\mu\text{mol}$ ) were dissolved in DMF (3.0 ml, 82 mmol) and the reaction mixture was stirred for 24 h at 25 °C. The reaction mixture was diluted with acetonitrile and purified by preparative HPLC to afford 165 mg (57% yield) of the title compound.

LC-MS (method B):  $R_t = 1.13$  min; MS (ESIpos):  $m/z = 483$   $[M+H]^+$

$^1\text{H}$  NMR (DMSO- $d_6$ , 400 MHz)  $\delta$  1.70–1.83 (m, 1H), 2.01–2.09 (m, 2H), 2.10–2.19 (m, 1H), 3.11–3.17 (m, 1H), 3.22–3.30 (m, 2H), 3.50 (t, 1H,  $J=12.93$  Hz), 3.58–3.67 (m, 1H), 3.79 (s, 3H), 3.96 (s, 3H), 7.36 (s, 1H), 8.23 (dd, 1H,  $J=7.60, 1.27$  Hz), 8.39–8.45 (m, 1H), 8.45–8.49 (m, 1H), 8.58 (s, 1H), 10.53 (s, 1H).

## Synthesis of compound 37

### Intermediate 37-a

#### 1-(2-Fluoro-4-hydroxy-5-nitrophenyl)ethan-1-one

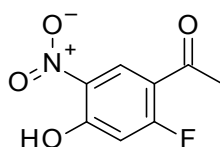

1-(2-Fluoro-4-hydroxyphenyl)ethan-1-one (10.0 g, 64.9 mmol) was dissolved in sulfuric acid (150 ml, 2.8 mol) and potassium nitrate (7.87 g, 77.9 mmol) was slowly added at -5 °C. The reaction mixture was stirred for 2 h at -5 °C. The reaction mixture was slowly poured into iced

water and the resulting precipitate obtained was collected by filtration, washed with water and hexane, and dried to afford 12.28 g (95% yield) of the title compound.

MS (ESIpos):  $m/z = 200$   $[M+H]^+$

$^1\text{H}$  NMR (DMSO- $d_6$ , 400 MHz)  $\delta$  2.55 (d, 3H,  $^5J_{\text{HF}}=4.56$  Hz), 6.98 (d, 1H,  $^3J_{\text{HF}}=12.42$  Hz), 8.39 (d, 1H,  $^4J_{\text{HF}}=7.86$  Hz), 12.48 (br s, 1H).

### **Intermediate 37-b**

#### **3-Methyl-5-nitro-1H-indazol-6-ol**

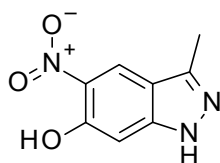

1-(2-Fluoro-4-hydroxy-5-nitrophenyl)ethan-1-one (12.3 g, 61.5 mmol) was dissolved in ethanol (120 ml, 2.1 mol) and hydrazine hydrate (15 ml, 310 mmol) was slowly added. The reaction mixture was stirred for 2 h at 100 °C. After cooling, water was added and the pH was adjusted to 3 to 4 with 1 N HCl. The precipitate obtained was collected by filtration and dried to afford 6.67 g (56% yield) of the title compound.

MS (ESIpos):  $m/z = 194$   $[M+H]^+$

$^1\text{H}$  NMR (DMSO- $d_6$ , 400 MHz)  $\delta$  2.47 (s, 3H), 6.94 (s, 1H), 8.42 (s, 1H), 10.74 (s, 1H), 12.69 (s, 1H).

### **Intermediate 37-c**

#### **6-Methoxy-3-methyl-5-nitro-1H-indazole**

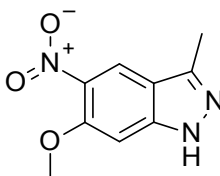

3-Methyl-5-nitro-1H-indazol-6-ol (3.90 g, 20.2 mmol) and iodomethane (1.5 ml, 24 mmol) were dissolved in DMF (75 ml) and potassium carbonate (4.19 g, 30.3 mmol) was added. The reaction mixture was stirred for 2 h at 60 °C. After concentration *in vacuo* the residue was diluted with water and extracted with ethyl acetate three times. The combined organic

extracts were washed with water, brine, dried over anhydrous magnesium sulfate, filtered, and concentrated *in vacuo* to afford 4.03 g (96% yield) of the title compound.

MS (ESIpos):  $m/z = 208 [M+H]^+$ .

$^1\text{H NMR}$  (DMSO- $d_6$ , 400 MHz)  $\delta$  2.48 (s, 3H), 3.94 (s, 3H), 7.11 (s, 1H), 8.40 (s, 1H), 12.95 (s, 1H).

### Intermediate 37-d

#### 6-Methoxy-3-methyl-1H-indazol-5-amine

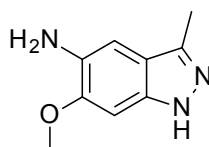

6-Methoxy-3-methyl-5-nitro-1H-indazole (2.00 g, 9.65 mmol) was dissolved in a mixture of THF (60 ml) and methanol (23 ml). Palladium on charcoal (1.03 g, 10 % purity, 1.17 mmol) was added under argon and the reaction mixture was stirred for 3 h at 25 °C in a hydrogen atmosphere (1 bar). The reaction mixture was filtered and the filtrate was concentrated *in vacuo* to afford 1.63 g (95% yield) of the title compound.

MS (ESIpos):  $m/z = 178 [M+H]^+$

$^1\text{H NMR}$  (DMSO- $d_6$ , 400 MHz)  $\delta$  2.32 (s, 3H), 3.82 (s, 3H), 4.46 (br s, 2H), 6.72 (s, 1H), 6.74 (s, 1H), 11.99 (s, 1H).

### Intermediate 37-e

#### N-(6-Methoxy-3-methyl-1H-indazol-5-yl)-6-(trifluoromethyl)pyridine-2-carboxamide

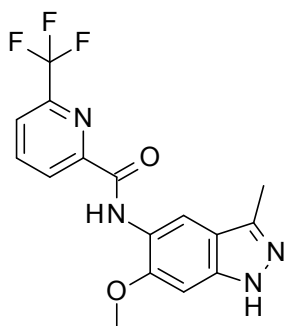

6-Methoxy-3-methyl-1H-indazol-5-amine (800 mg, 74 % purity, 3.34 mmol), 6-(trifluoromethyl)pyridine-2-carboxylic acid (638 mg, 3.34 mmol), HATU (1.91 g, 5.01 mmol), and TEA (700  $\mu\text{L}$ , 5.0 mmol) were dissolved in DMF (10 ml, 270 mmol) and the reaction

mixture was stirred for 24 h at 25 °C. The reaction mixture was poured into water and stirred for 30 minutes. The precipitate that was obtained was collected by filtration and washed with water. The filter cake was dissolved in DCM, dried over anhydrous magnesium sulfate, filtered, and concentrated *in vacuo* to afford 1.31 g (crude) of the title compound.

<sup>1</sup>H NMR (DMSO-d<sub>6</sub>, 400 MHz) δ 2.46 (s, 3H), 4.00 (s, 3H), 7.05 (s, 1H), 8.22 (dd, 1H, *J*=7.60, 1.27 Hz), 8.38-8.44 (m, 1H), 8.44-8.47 (m, 1H), 8.65 (s, 1H), 10.41 (s, 1H), 12.51 (s, 1H).

LC-MS (method B): Rt = 1.15 min; MS (ESIpos): m/z = 351 [M+H]<sup>+</sup>

### **Compound 37 (step 37-f)**

#### **N-[2-(3-Hydroxy-3-methylbutyl)-6-methoxy-3-methyl-2H-indazol-5-yl]-6-(trifluoromethyl)pyridine-2-carboxamide**

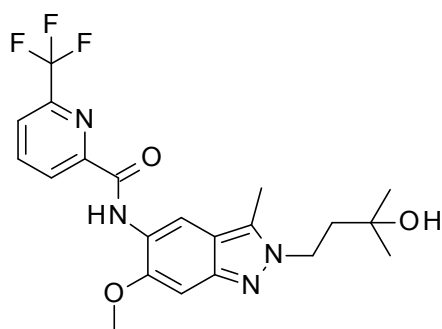

N-(6-Methoxy-3-methyl-1H-indazol-5-yl)-6-(trifluoromethyl)pyridine-2-carboxamide (959 mg, 2.74 mmol) and 4-bromo-2-methylbutan-2-ol (330 μL, 2.7 mmol) were dissolved in DMF (9.6 ml, 120 mmol) and potassium carbonate (1.14 g, 8.21 mmol) was added. The reaction mixture was stirred for 24 h at 60 °C. After filtration, the filtrate was diluted with acetonitrile and purified using preparative HPLC. The product fractions were pooled and concentrated *in vacuo* to afford 93 mg (8% yield) of the title compound.

<sup>1</sup>H NMR (DMSO-d<sub>6</sub>, 600 MHz) δ 1.17 (s, 6H), 1.88–1.94 (m, 2H), 2.59 (s, 3H), 3.97 (s, 3H), 4.32–4.39 (m, 2H), 7.06 (s, 1H), 8.22 (d, 1H, *J*=7.63 Hz), 8.39-8.44 (m, 1H), 8.44–8.48 (m, 1H), 8.61 (s, 1H), 10.48 (s, 1H).

LC-MS (method B): Rt = 1.27 min; MS (ESIpos): m/z = 437 [M+H]<sup>+</sup>

### **Synthesis of compound 38**

#### **Intermediate 38-a**

### Methyl 3-(4-methoxy-4-oxobutanamido)-4-(methylamino)benzoate

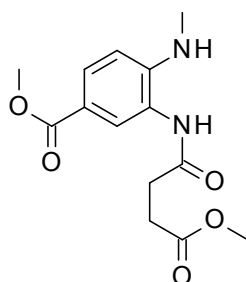

Methyl 3-amino-4-(methylamino)benzoate (5.00 g, 27.7 mmol), 4-methoxy-4-oxobutanoic acid (5.50 g, 41.6 mmol), HATU (15.8 g, 41.6 mmol), and TEA (5.8 ml, 42 mmol) were dissolved in DMF (75 ml) and the reaction mixture was stirred for 6 h at 25 °C. The reaction mixture was diluted with acetonitrile and purified using preparative HPLC (method C). The product fractions were pooled and concentrated *in vacuo* to afford 6.58 g (81% yield) of the title compound.

MS (ESIpos):  $m/z = 295 [M+H]^+$

$^1\text{H NMR}$  (DMSO- $d_6$ , 400 MHz)  $\delta$  2.62 (t, 4H,  $J=3.80$  Hz), 2.78 (d,  $J=4.82$  Hz, 3H), 3.62 (s, 3H), 3.76 (s, 3H), 5.90 (q,  $J=4.82$  Hz, 1H), 6.61 (d,  $J=8.36$  Hz, 1H), 7.66-7.71 (m, 2H), 9.16 (s, 1H).

### Intermediate 38-b

#### Methyl 2-(3-methoxy-3-oxopropyl)-1-methyl-1H-benzimidazole-5-carboxylate

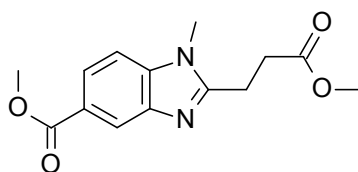

Methyl 3-(4-methoxy-4-oxobutanamido)-4-(methylamino)benzoate (6.58 g, 22.4 mmol) was dissolved in acetic acid (53 ml) and the reaction mixture was stirred for 48 h at 40 °C. The reaction mixture was concentrated *in vacuo* to afford 6.43 g (crude) of the title compound.

MS (ESIpos):  $m/z = 277 [M+H]^+$

$^1\text{H NMR}$  (DMSO- $d_6$ , 400 MHz)  $\delta$  2.89–2.98 (m, 2H), 3.12–3.20 (m, 2H), 3.62 (s, 3H), 3.80 (s, 3H), 3.86 (s, 3H), 7.63 (d, 1H,  $J=8.36$  Hz), 7.86 (dd, 1H,  $J=8.36, 1.52$ ), 8.14 (d, 1H,  $J=1.01$  Hz).

### Intermediate 38-c

### Methyl 2-(3-methoxy-3-oxopropyl)-1-methyl-6-nitro-1H-benzimidazole-5-carboxylate

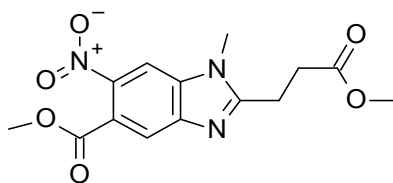

Methyl 2-(3-methoxy-3-oxopropyl)-1-methyl-1H-benzimidazole-5-carboxylate (6.43 g, 23.3 mmol) was dissolved in concentrated sulfuric acid (52 ml, 980 mmol) and a mixture of concentrated nitric acid and sulfuric acid (1:1.4) (2.7 ml, 9.0 M, 24 mmol) was slowly added at 0 °C. The reaction mixture was stirred for 1 h at 25 °C. The reaction mixture was poured into iced water and the pH was adjusted to 10 with sat. sodium bicarbonate solution. The precipitate obtained was collected by filtration and washed with water. The filter cake was dissolved in a mixture of ethyl acetate (300 ml), DCM (200 ml), and acetonitrile (100 ml); dried over anhydrous magnesium sulfate; filtered; and concentrated *in vacuo* to afford 5.48 g (78% yield) of the title compound.

MS (ESIpos):  $m/z = 322 [M+H]^+$ .

$^1\text{H NMR}$  (DMSO- $d_6$ , 400 MHz)  $\delta$  2.92–2.99 (m, 2H), 3.19–3.24 (m, 2H), 3.62 (s, 3H), 3.84 (s, 3H), 3.89 (s, 3H), 7.96 (s, 1H), 8.46 (s, 1H).

### Intermediate 38-d

### Methyl 6-amino-2-(3-methoxy-3-oxopropyl)-1-methyl-1H-benzimidazole-5-carboxylate

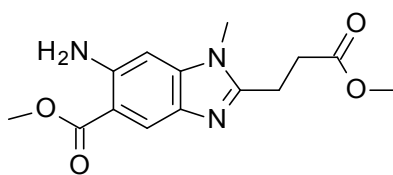

Methyl 2-(3-methoxy-3-oxopropyl)-1-methyl-6-nitro-1H-benzimidazole-5-carboxylate (5.84 g, 18.2 mmol) was dissolved in a mixture of THF (180 mL, 2.2 mol) and methanol (77 mL, 1.9 mol). Palladium on charcoal (10 % Pd, 1.8 mmol) was added and the reaction mixture was stirred for 2 h at 25 °C in a hydrogen atmosphere. After filtration, the filtrate was concentrated *in vacuo* to afford 5.45 g of the title compound (crude batch) that was used without further purification in the next step.

MS (ESIpos):  $m/z = 292 [M+H]^+$

$^1\text{H}$  NMR (DMSO- $d_6$ , 400 MHz)  $\delta$  2.83–2.89 (m, 2H), 3.01–3.07 (m, 2H), 3.58 (s, 3H), 3.61 (s, 3H), 3.79 (s, 3H), 6.43 (s, 2H), 6.64 (s, 1H), 7.91 (s, 1H).

### **Intermediate 38-e**

#### **Methyl 2-(3-methoxy-3-oxopropyl)-1-methyl-6-[[6-(trifluoromethyl)pyridine-2-carbonyl]amino]-1H-benzimidazole-5-carboxylate**

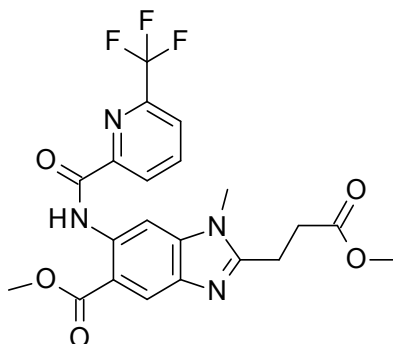

Methyl 6-amino-2-(3-methoxy-3-oxopropyl)-1-methyl-1H-benzimidazole-5-carboxylate (500 mg, 1.72 mmol), 6-(trifluoromethyl)pyridine-2-carboxylic acid (492 mg, 2.57 mmol), HATU (979 mg, 2.57 mmol), and TEA (360  $\mu\text{L}$ , 2.6 mmol) were dissolved in DMF (4.6 ml). The reaction mixture was stirred for 1.5 h at 25  $^\circ\text{C}$ . The reaction mixture was poured into water (100 ml) and stirred for 15 minutes. The precipitate obtained was collected by filtration, washed with water, and dried. The filter cake was dissolved in DCM (40 ml), dried over anhydrous magnesium sulfate, filtered, and concentrated *in vacuo* to afford 700 mg (88% yield) of the title compound.

MS (ESIpos):  $m/z$  = 465  $[\text{M}+\text{H}]^+$

$^1\text{H}$  NMR (DMSO- $d_6$ , 400 MHz)  $\delta$  2.91–2.97 (m, 2H), 3.14–3.20 (m, 2H), 3.63 (s, 3H), 3.79 (s, 3H), 3.94 (s, 3H), 8.23 (dd, 1H,  $J=7.73, 0.89$  Hz), 8.28 (s, 1H), 8.38–8.44 (m, 1H), 8.47–8.51 (m, 1H), 8.95 (s, 1H), 12.98 (s, 1H).

### **Compound 38 (step 38-f)**

#### **N-[2-(3-Hydroxy-3-methylbutyl)-5-(2-hydroxypropan-2-yl)-1-methyl-1H-benzimidazol-6-yl]-6-(trifluoromethyl)pyridine-2-carboxamide**

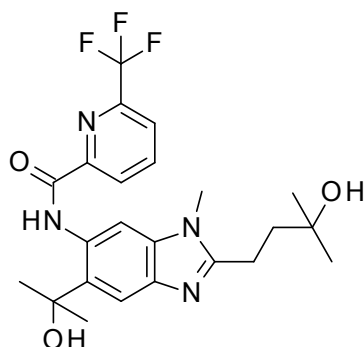

Methyl 2-(3-methoxy-3-oxopropyl)-1-methyl-6-[[6-(trifluoromethyl)pyridine-2-carbonyl]amino]-1H-benzimidazole-5-carboxylate (700 mg, 1.51 mmol) was dissolved in THF (46 ml, 570 mmol) and cooled to 0 °C. Methylmagnesium bromide solution in 2-methyltetrahydrofuran (5.3 ml, 3.4 M, 18 mmol) was added slowly and the reaction mixture was stirred for 24 h at 25 °C. After the addition of sat. ammonium chloride solution (30 ml) the two-phase mixture was stirred for an additional 5 minutes. After phase separation, the organic layer was dried over anhydrous magnesium sulfate, filtered, and concentrated *in vacuo*. The residue was dissolved in THF (45 ml) and cooled to 0 °C. Additional methylmagnesium bromide solution in 2-methyltetrahydrofuran (5.3 ml, 3.4 M, 18 mmol) was added slowly and stirring continued for 1 h at 0 °C. After quenching with sat. ammonium chloride solution and stirring for 5 minutes, the phases were separated, and the organic layer was dried over anhydrous magnesium sulfate, filtered, and concentrated *in vacuo*. The residue was diluted with acetonitrile and purified using preparative HPLC (method D). The product fractions were pooled and concentrated *in vacuo* to afford 105 mg (15% yield) of the title compound.

LC-MS (method A): Rt = 0.90 min; MS (ESIpos): m/z = 465 [M+H]<sup>+</sup>

<sup>1</sup>H NMR (DMSO-d<sub>6</sub>, 400 MHz) δ 1.18 (s, 6H), 1.61 (s, 6H), 1.81–1.90 (m, 2H), 2.86–2.95 (m, 2H), 3.73 (s, 3H), 4.48 (s, 1H), 5.90 (s, 1H), 7.52 (s, 1H), 8.18 (dd, 1H, J=7.73, 0.89 Hz), 8.35–8.41 (m, 1H), 8.44–8.49 (m, 1H), 8.55 (s, 1H), 12.49 (s, 1H).



## Synthesis of compound 39

### Intermediate 39-a

#### Methyl 4-(ethylamino)-3-(4-methoxy-4-oxobutanamido)benzoate

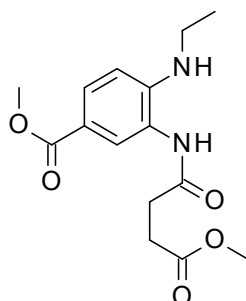

Methyl 3-amino-4-(ethylamino)benzoate (5.00 g, 25.7 mmol), 4-methoxy-4-oxobutanoic acid (5.10 g, 38.6 mmol), HATU (14.7 g, 38.6 mmol), and TEA (5.4 ml, 39 mmol) were dissolved in DMF (66 ml). The reaction mixture was stirred for 24 h at 25 °C and poured into water. The formed suspension was stirred for an additional 10 minutes and the precipitate was collected by filtration and washed with water. The filter cake was dissolved in a mixture of DCM (30 ml), THF (7.5 ml), and acetonitrile (7.5 ml) and dried over anhydrous magnesium sulfate, filtered, and concentrated *in vacuo* to afford 7.73 g (97% yield) of the title compound.

MS (ESIpos):  $m/z = 309$  [M+H]<sup>+</sup>

### Intermediate 39-b

#### Methyl 1-ethyl-2-(3-methoxy-3-oxopropyl)-1H-benzimidazole-5-carboxylate

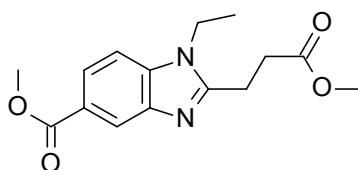

Methyl 4-(ethylamino)-3-(4-methoxy-4-oxobutanamido)benzoate (7.73 g, 25.1 mmol) was dissolved in acetic acid (150 ml). The reaction mixture was stirred for 72 h at 25 °C and 48 h at 60 °C. After concentration *in vacuo* the residue was diluted with toluene and again concentrated *in vacuo*. After repeating this process three times, the product was dried to afford 7.90 g (crude) of the title compound.

MS (ESIpos):  $m/z = 291$  [M+H]<sup>+</sup>

### Intermediate 39-c

#### **Methyl 1-ethyl-2-(3-methoxy-3-oxopropyl)-6-nitro-1H-benzimidazole-5-carboxylate**

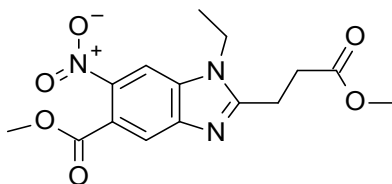

Methyl 1-ethyl-2-(3-methoxy-3-oxopropyl)-1H-benzimidazole-5-carboxylate (7.90 g, 27.2 mmol) was dissolved in concentrated sulfuric acid (61 ml, 1.1 mol) and cooled to 0 °C. A mixture of nitric acid and sulfuric acid (3.2 ml, 9.0 M, 29 mmol) was added. The reaction mixture was stirred for 1.5 h at 25 °C and poured slowly into iced water. The pH was adjusted to 10 via the slow addition of sat. sodium bicarbonate solution. The precipitate was collected by filtration and washed with water. The filter cake was redissolved in DCM, dried over anhydrous magnesium sulfate, filtered, and concentrated *in vacuo*. The crude material was purified using Biotage Isolera™ chromatography (SNAP KP-Sil – 340 g, eluting with hexane-ethyl acetate, 1:0 to 2:3) to afford 7.44 g (82% yield) of the title compound.

MS (ESIpos):  $m/z = 336$  [M+H]<sup>+</sup>

### Intermediate 39-d

#### **Methyl 6-amino-1-ethyl-2-(3-methoxy-3-oxopropyl)-1H-benzimidazole-5-carboxylate**

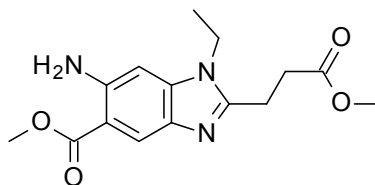

Under argon methyl 1-ethyl-2-(3-methoxy-3-oxopropyl)-6-nitro-1H-benzimidazole-5-carboxylate (6.94 g, 20.7 mmol) was dissolved in THF (200 ml, 2.5 mol) and methanol (77 ml, 1.9 mol) and palladium on charcoal (1.8 ml, 10 % purity, 2.1 mmol) was added. The reaction mixture was stirred for 3 h at 25 °C under a hydrogen atmosphere (1 bar). The reaction mixture was filtered, washed with ethyl acetate and the filtrate was concentrated *in vacuo* to afford 6.25 g (99% yield) of the title compound.

MS (ESIpos):  $m/z = 306$  [M+H]<sup>+</sup>.

$^1\text{H}$  NMR (DMSO- $d_6$ , 400 MHz)  $\delta$  1.27 (t, 3H,  $J=7.22$  Hz), 2.85–2.91 (m, 2H), 3.00–3.06 (m, 2H), 3.60 (s, 3H), 3.79 (s, 3H), 4.06 (q, 2H,  $J=7.10$  Hz), 6.41 (s, 2H), 6.67 (s, 1H), 7.91 (s, 1H).

### **Intermediate 39-e**

#### **Methyl 1-ethyl-2-(3-methoxy-3-oxopropyl)-6-[[6-(trifluoromethyl)pyridine-2-carbonyl]amino]-1H-benzimidazole-5-carboxylate**

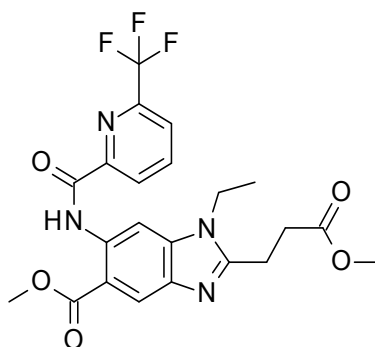

Methyl 6-amino-1-ethyl-2-(3-methoxy-3-oxopropyl)-1H-benzimidazole-5-carboxylate (200 mg, 655  $\mu\text{mol}$ ), 6-(trifluoromethyl)pyridine-2-carboxylic acid (188 mg, 983  $\mu\text{mol}$ ), HATU (374 mg, 983  $\mu\text{mol}$ ), and TEA (140  $\mu\text{L}$ , 980  $\mu\text{mol}$ ) were dissolved in DMF (2.9 ml). The reaction mixture was stirred for 24 h at 25  $^\circ\text{C}$ . Water was added and the precipitate was collected using filtration, washed with water and hexane, and dried to afford 317 mg (96% yield) of the title compound.

MS (ESIpos):  $m/z = 479$   $[\text{M}+\text{H}]^+$

$^1\text{H}$  NMR (CHLOROFORM- $d$ , 400 MHz)  $\delta$  1.48 (t, 3H,  $J=7.22$  Hz), 3.02–3.11 (m, 2H), 3.16–3.22 (m, 2H), 3.72 (s, 3H), 4.03 (s, 3H), 4.27 (q, 2H,  $J=7.27$  Hz), 7.89 (1H, dd,  $J=7.86$ , 1.01 Hz), 8.13 (t, 1H,  $J=7.86$  Hz), 8.49 (d, 1H,  $J=7.35$  Hz), 8.52 (s, 1H), 9.03 (s, 1H), 13.28 (s, 1H).

### Compound 39 (step 39-f)

#### **N-[1-Ethyl-2-(3-hydroxy-3-methylbutyl)-5-(2-hydroxypropan-2-yl)-1H-benzimidazol-6-yl]-6-(trifluoromethyl)pyridine-2-carboxamide**

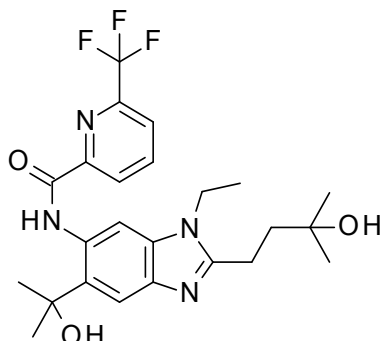

Methyl 1-ethyl-2-(3-methoxy-3-oxopropyl)-6-[[6-(trifluoromethyl)pyridine-2-carbonyl]amino]-1H-benzimidazole-5-carboxylate (282 mg, 590  $\mu\text{mol}$ ) was dissolved in THF (18 ml) and cooled to 0 °C under an argon atmosphere. A solution of methylmagnesium bromide in 2-methyltetrahydrofuran (2.1 ml, 3.4 M, 7.1 mmol) was slowly added and the reaction mixture was stirred for 1 h at 0 °C and for 24 h at 25 °C. After the addition of sat. ammonium chloride solution, the phases were separated and the organic layer was dried over anhydrous magnesium sulfate, filtered, and concentrated *in vacuo*. The residue was diluted with acetonitrile and purified using preparative HPLC. The product fractions were pooled and concentrated *in vacuo* to afford 55 mg (19% yield) of the title compound.

LC-MS (method A):  $R_t$  = 0.96 min; MS (ESIpos):  $m/z$  = 479  $[\text{M}+\text{H}]^+$

$^1\text{H}$  NMR (DMSO- $d_6$ , 400 MHz)  $\delta$  1.18 (s, 6H), 1.35 (t, 3H,  $J=7.10$  Hz), 1.61 (s, 6H), 1.84–1.92 (m, 2H), 2.85–2.93 (m, 2H), 4.20 (q, 2H,  $J=6.93$  Hz), 4.48 (s, 1H), 5.88 (s, 1H), 7.52 (s, 1H), 8.17 (dd, 1H,  $J=7.73, 0.89$  Hz), 8.35–8.42 (m, 1H), 8.44–8.49 (m, 1H), 8.58 (s, 1H), 12.48 (s, 1H).

## Synthesis of compound 40

### Intermediate 40-a

#### ***tert*-Butyl {2-[2-(methanesulfonyl)ethyl]-6-methoxy-2H-indazol-5-yl}carbamate**

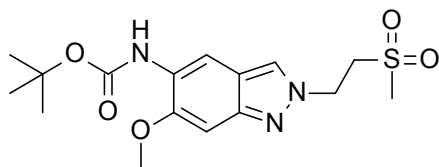

*tert*-Butyl (6-methoxy-1H-indazol-5-yl)carbamate (intermediate 23-a, 2.50 g, 9.49 mmol) and 1-bromo-2-(methanesulfonyl)ethane (2.66 g, 14.2 mmol) were dissolved in DMF (40 ml) and potassium carbonate (5.25 g, 38.0 mmol) was added. The reaction mixture was stirred for 21 h at 25 °C. After dilution with water, the reaction mixture was extracted with ethyl acetate three times. The combined organic extracts were washed with brine, filtered over a water-free filter, and concentrated *in vacuo*. The crude material was purified using Biotage Isolera™ chromatography (SNAP KP-Sil – 100 g, eluting with hexane-ethyl acetate, 1:0 to 0:1) to afford 1.36 g (35% yield, 89% purity) of the title compound.

MS (ESIpos):  $m/z = 370$  [M+H]<sup>+</sup>

<sup>1</sup>H NMR (DMSO-*d*<sub>6</sub>, 500 MHz)  $\delta$  1.47 (s, 9H), 2.86 (s, 3H), 3.81 (t, 2H,  $J=6.83$  Hz), 3.86 (s, 3H), 4.77 (t, 2H,  $J=6.99$  Hz), 6.99 (s, 1H), 7.80 (s, 1H), 7.92 (br s, 1H), 8.26 (d, 1H,  $J=0.64$  Hz).

### Intermediate 40-b

#### **2-[2-(Methanesulfonyl)ethyl]-6-methoxy-2H-indazol-5-amine**

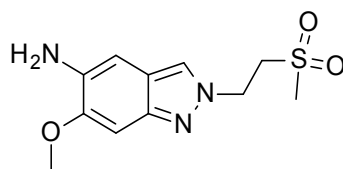

*tert*-Butyl {2-[2-(methanesulfonyl)ethyl]-6-methoxy-2H-indazol-5-yl}carbamate (1.36 g, 3.68 mmol) was dissolved in DCM (20 ml) and TFA (2.8 ml, 37 mmol) was added. The reaction mixture was stirred for 23 h at 25 °C. The reaction mixture was slowly diluted with sat. sodium bicarbonate solution and, after stirring for 10 minutes, extracted with DCM two times. The

combined organic extracts were washed with brine, filtered over a water-free filter, and concentrated *in vacuo* to afford 930 mg (81% yield) of the title compound.

LC-MS (method B):  $R_t = 0.58$  min; MS (ESIpos):  $m/z = 270$  [M+H]<sup>+</sup>

### **Compound 40 (step 40-c)**

#### **6-(2-Hydroxypropan-2-yl)-N-{2-[2-(methanesulfonyl)ethyl]-6-methoxy-2H-indazol-5-yl}pyridine-2-carboxamide**

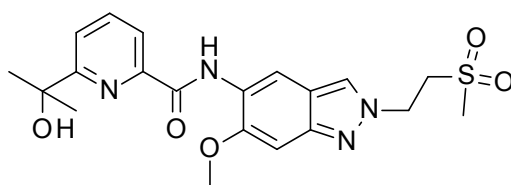

2-[2-(Methanesulfonyl)ethyl]-6-methoxy-2H-indazol-5-amine (100 mg, 371  $\mu$ mol) was dissolved in THF (2.5 ml) and potassium 6-(2-hydroxypropan-2-yl)pyridine-2-carboxylate (114 mg, crude batch, prepared from methyl 6-(2-hydroxypropan-2-yl)pyridine-2-carboxylate using potassium hydroxide in methanol at 50 °C and subsequent evaporation), EDC (142 mg, 743  $\mu$ mol), HOBt (56.9 mg, 371  $\mu$ mol), and TEA (160  $\mu$ L, 1.1 mmol) were added. The reaction mixture was stirred for 17.5 h at 25 °C, diluted with water, and extracted with ethyl acetate three times. The combined organic extracts were filtered over a water-repellent filter and concentrated *in vacuo*. The residue was diluted with 2.5 mL DMSO and purified using preparative HPLC. The product fractions were pooled and concentrated *in vacuo* to afford 95.3 mg (95% yield) of the title compound.

LC-MS (method B):  $R_t = 0.89$  min; MS (ESIpos):  $m/z = 433$  [M+H]<sup>+</sup>

<sup>1</sup>H NMR (DMSO-*d*<sub>6</sub>, 400 MHz)  $\delta$  1.56 (s, 6H), 2.89 (s, 3H), 3.82 (t, 2H,  $J=6.95$  Hz), 3.99 (s, 3H), 4.79 (t, 2H,  $J=6.95$  Hz), 5.43 (s, 1H), 7.13 (s, 1H), 7.92 (dd, 1H,  $J=7.83, 1.26$  Hz), 7.98–8.02 (m, 1H), 8.03–8.08 (m, 1H), 8.36 (s, 1H), 8.66 (s, 1H), 10.91 (s, 1H).

## Synthesis of compound 41

### Intermediate 41-a

#### 5-Bromo-1,2-dimethyl-6-nitro-1H-benzimidazole

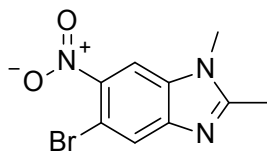

5-Bromo-1,2-dimethyl-1H-benzimidazole 5.60 g (24.9 mmol) was dissolved in concentrated sulfuric acid (16.2 ml). The reaction mixture was cooled to 0 °C and fuming nitric acid (0.98 ml) was then added dropwise overnight while stirring at rt. The reaction mixture was then poured into crushed ice and brought to a pH of 5–6 by adding aqueous ammonia solution (40%). The resulting precipitate was removed by filtration. The residue was purified using silica gel column chromatography (petroleum ether/ethyl acetate gradient). The solvent was removed *in vacuo* and evaporated to dryness to give 6.0 g (72% yield) of the product as a yellow solid.

MS (ESIpos):  $m/z = 270$  (M+H)<sup>+</sup>

### Intermediate 41-b

#### 5-Bromo-1,2-dimethyl-1H-benzimidazol-6-amine

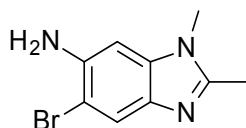

5-Bromo-1,2-dimethyl-6-nitro-1H-benzimidazole (6.00 g, 22.2 mmol) was dissolved in a mixture of THF (100 ml), water (100 ml), and ethanol (25 ml). Ammonium chloride (2.36 g, 44.4 mmol, 2 eq.) and iron (6.22 g, 111 mmol, 5.0 eq.) were added. The resulting mixture was stirred at 80 °C for 1 h. After cooling to rt, iron was removed by filtration. The residue was purified using silica gel column chromatography with methanol and DCM. After evaporation of the solvents *in vacuo*, the product (3.3 g, 61% yield) was obtained as a yellow solid.

MS (ESIpos):  $m/z = 240$  (M+H)<sup>+</sup>

### Intermediate 41-c

#### **N-(5-Bromo-1,2-dimethyl-1H-benzimidazol-6-yl)-6-(trifluoromethyl)pyridine-2-carboxamide**

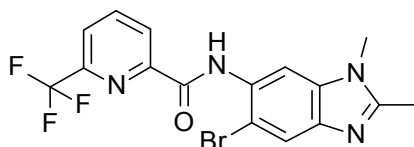

HATU (5.94 g, 15.6 mmol, 1.5 eq.) and TEA (3.6 ml, 26 mmol, 2.5 eq.) were added to a mixture of 5-bromo-1,2-dimethyl-1H-benzimidazol-6-amine (2.50 g, 10.4 mmol) and 6-(trifluoromethyl)pyridine-2-carboxylic acid (2.39 g, 12.5 mmol) in 2-methyltetrahydrofuran and the mixture was stirred for 16 h at rt. Water was added and the solid was removed by filtration with suction and washed with MTBE twice. Afterwards, the solid was stirred in MTBE, filtered, and dried to afford 4.26 g (crude material) of a batch that was used without further purification. MS (ESI<sup>neg</sup>):  $m/z = 411$  [M-H]<sup>-</sup>

<sup>1</sup>H NMR (DMSO-*d*<sub>6</sub>, 400 MHz)  $\delta$  selected signals: 3.74 (s, 3H), 7.89 (s, 1H), 8.25 (dd, 1H,  $J=1.0, 7.6$  Hz), 8.38–8.49 (m, 3H), 10.55 (s, 1H).

### Compound 41 (step 41-d)

#### **N-[1,2-Dimethyl-5-(1H-pyrazol-3-yl)-1H-benzimidazol-6-yl]-6-(trifluoromethyl)pyridine-2-carboxamide**

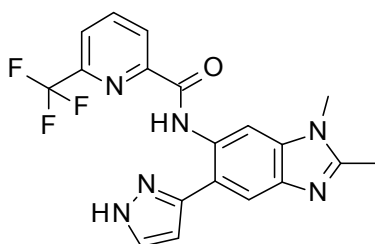

*N*-(5-Bromo-1,2-dimethyl-1H-benzimidazol-6-yl)-6-(trifluoromethyl)pyridine-2-carboxamide (120 mg, 290  $\mu$ mol), 1H-pyrazol-3-ylboronic acid (65.0 mg, 581  $\mu$ mol), potassium carbonate, and XPhos (dicyclohexyl(2',4',6'-triisopropylbiphenyl-2-yl)phosphan, 8.31 mg, 17.4  $\mu$ mol) were added to a microwave vial. Afterwards, 1,4-dioxane (2.4 ml) and water (0.8 ml) were added and the vial was flushed with nitrogen for 5 minutes. XPhos Pd G2 ((2'-amino[biphenyl]-2-yl)(chloro)palladium–dicyclohexyl(2',4',6'-triisopropyl[biphenyl]-2-yl)phosphine (1:1), 6.86 mg, 8.71  $\mu$ mol) was added and the mixture was stirred in a



microwave reactor at 120 °C for 2 h. Water and ethyl acetate were added and the resulting solid was filtered off, washed two times with water and three times with MTBE, and dried to afford 62.1 mg (53% yield) of the title compound.

LC-MS (method B): Rt = 1.00 min; MS (ESIpos): m/z = 401 [M+H]<sup>+</sup>

<sup>1</sup>H NMR (DMSO-d<sub>6</sub>, 400 MHz) δ 2.55 (s, 3H), 3.38 (s, 3H), 6.84–6.87 (m, 1H), 7.86–7.89 (m, 1H), 7.92 (s, 1H), 8.16–8.20 (m, 1H), 8.38 (t, 1H, J=7.7 Hz), 8.46 (d, 1H, J=7.9 Hz), 8.89 (s, 1H), 12.75 (br s, 1H), 13.03 (s, 1H).

**Figure S5. Original analytical data of test compounds**  
Compound 6

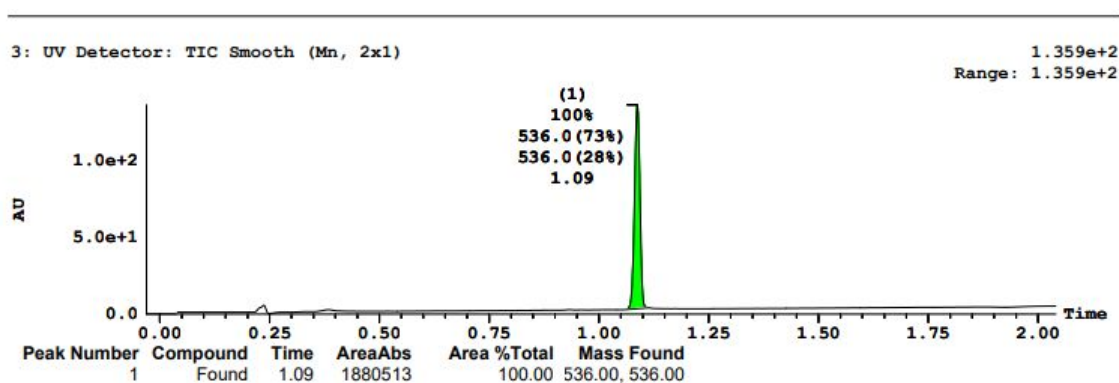

Compound 7

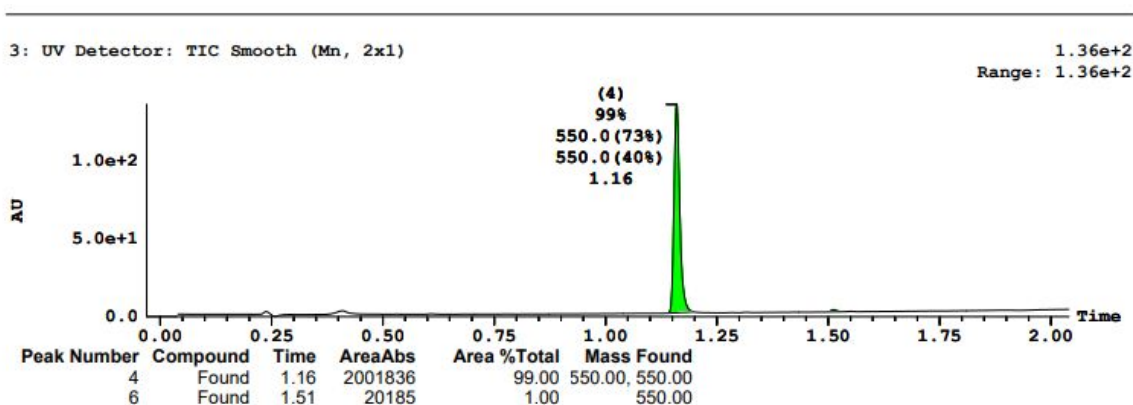

## Compound 8

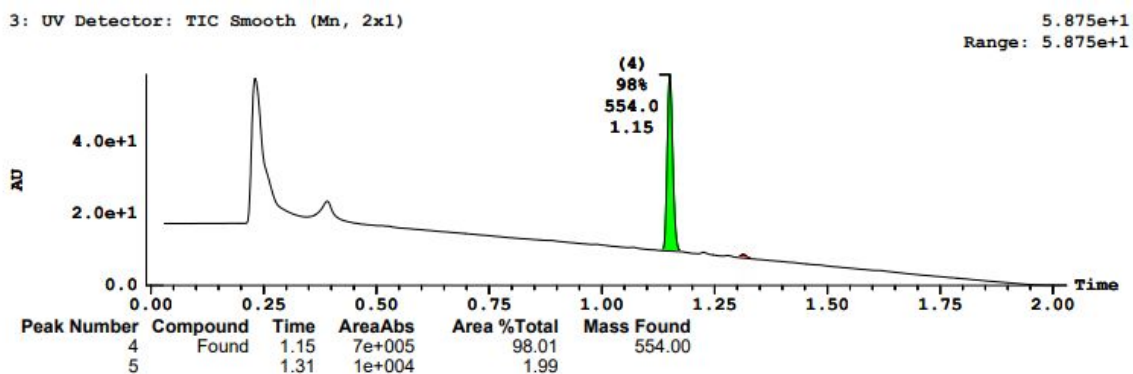

## Compound 9

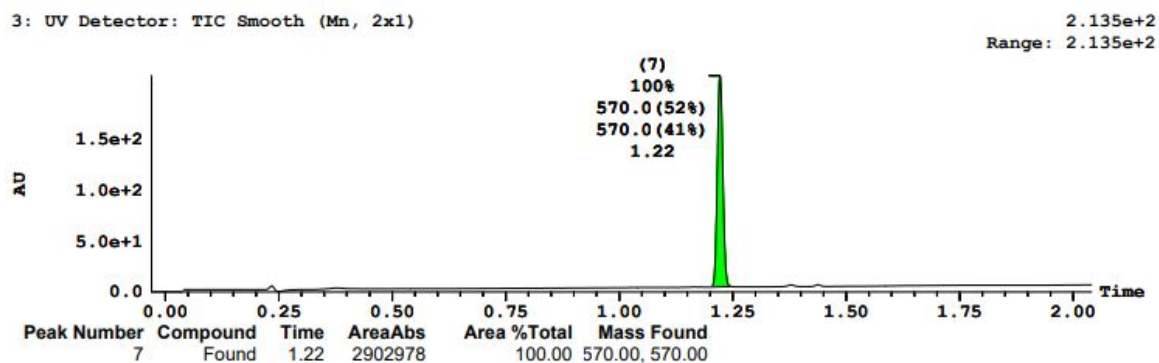

## Compound 10

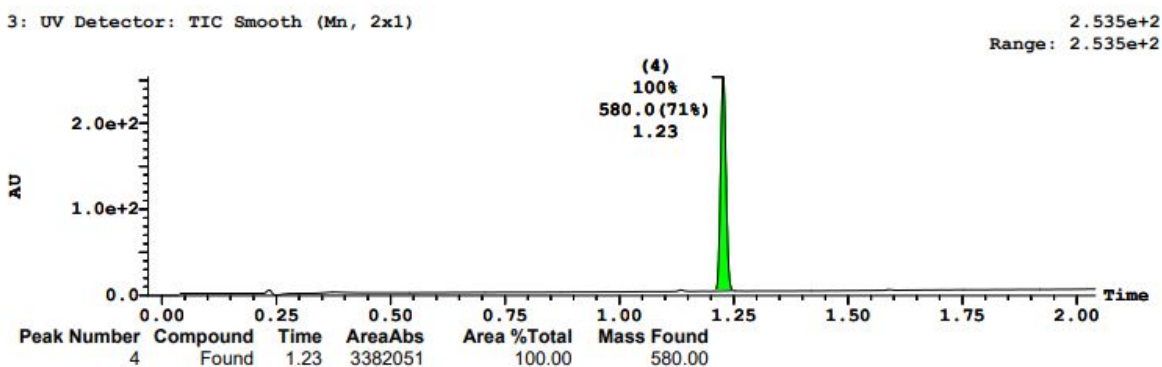

## Compound 11

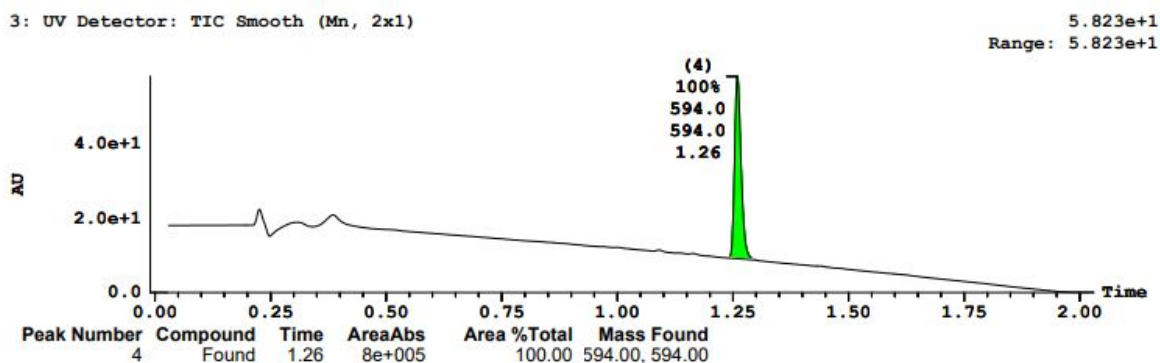

## Compound 12

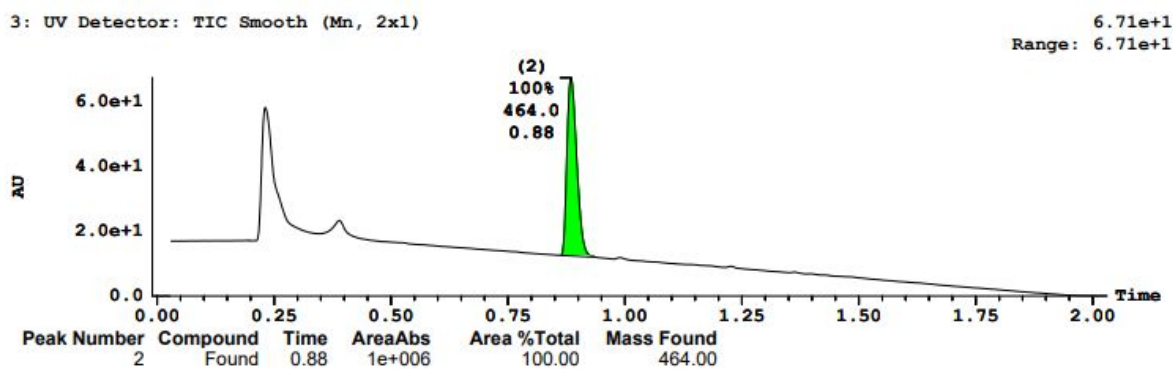

## Compound 13

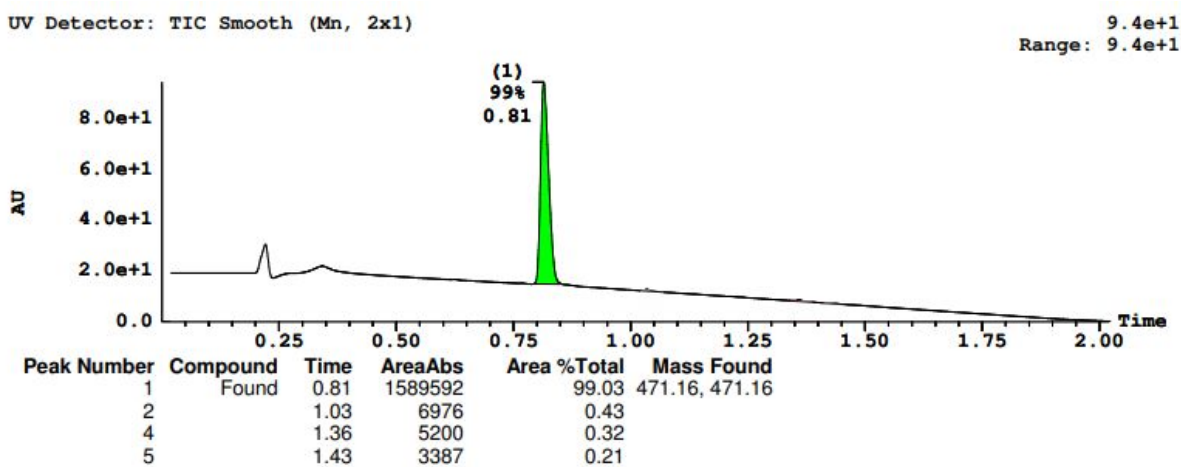

## Compound 14

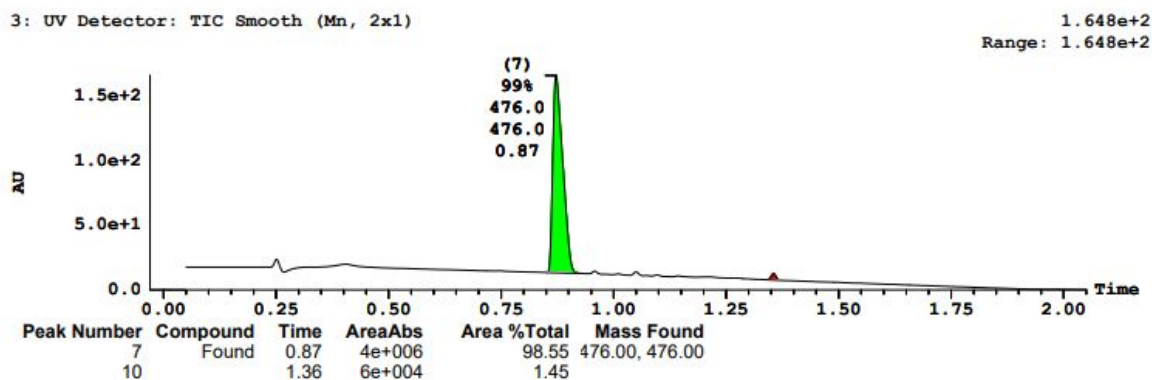

## Compound 15

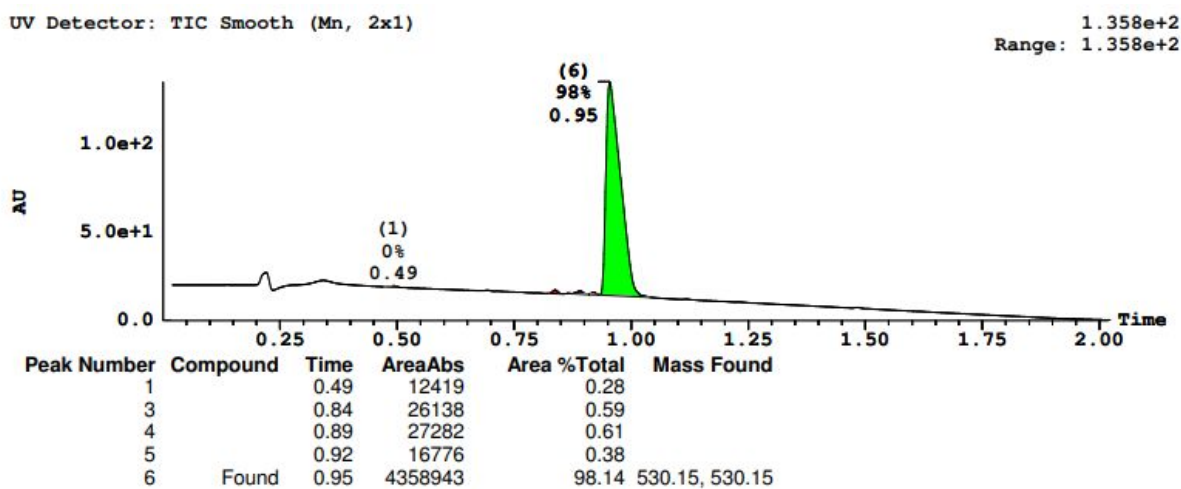

## Compound 16

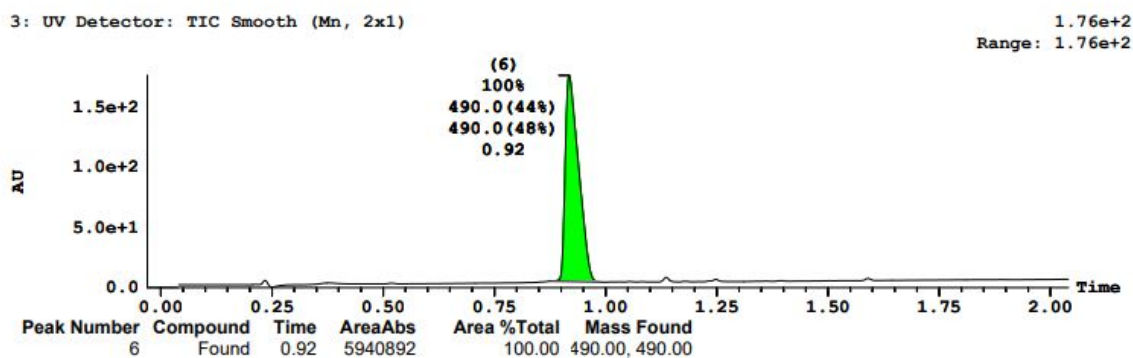

## Compound 17

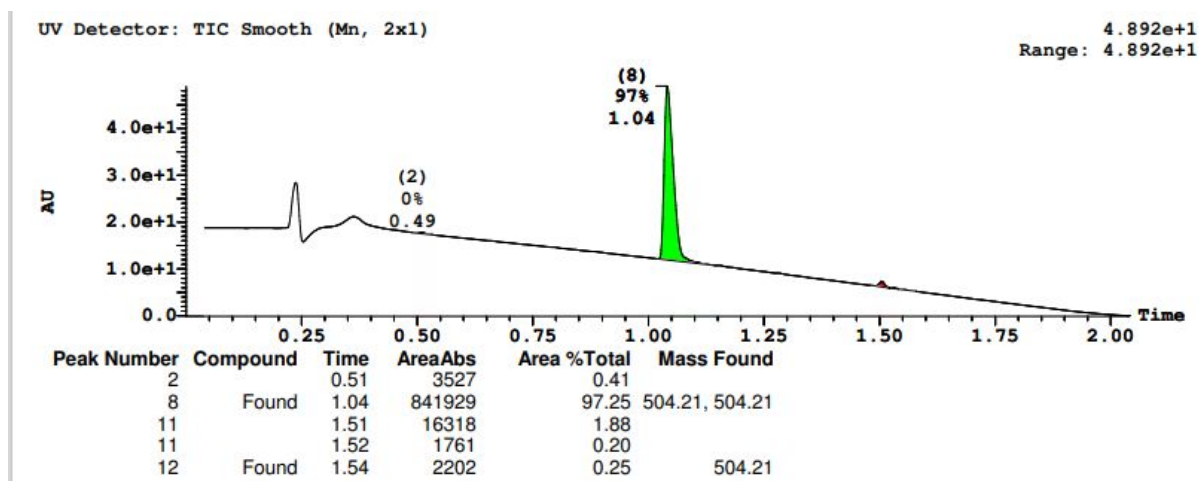

## Compound 18

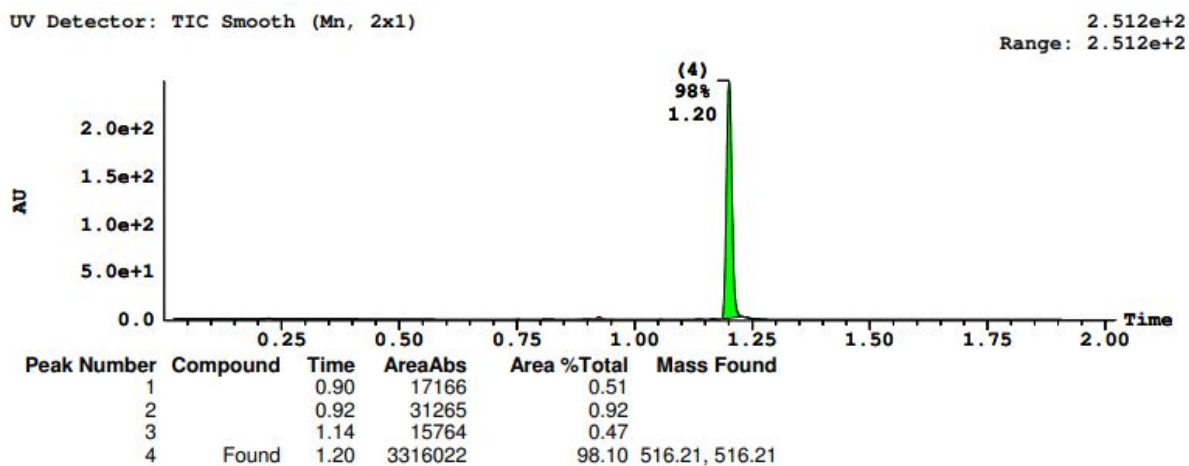

## Compound 19

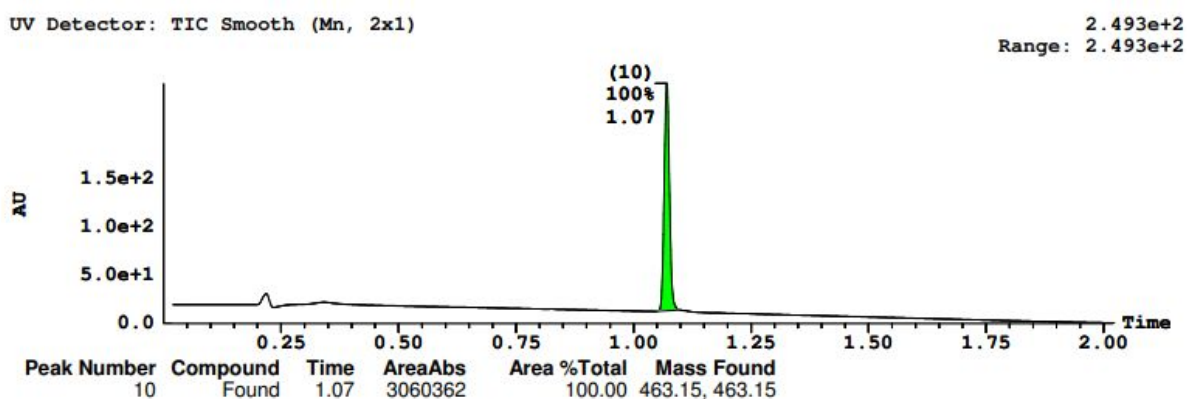

## Compound 20

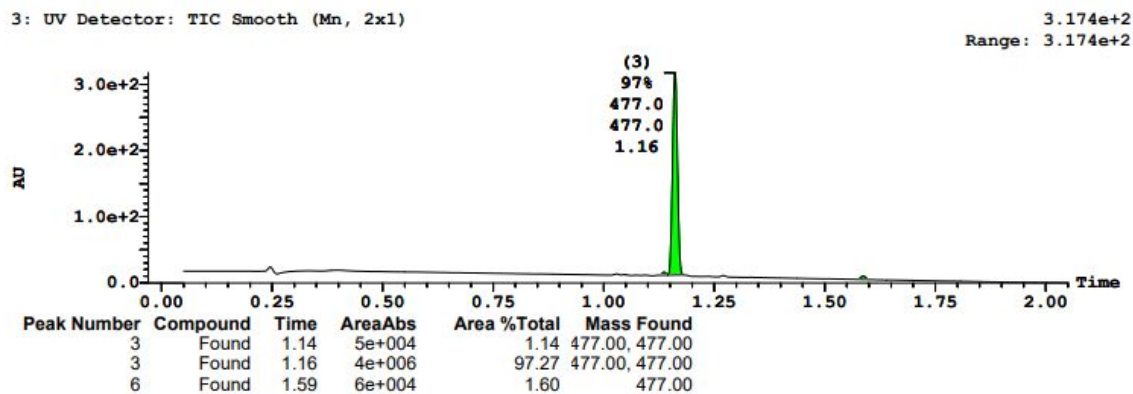

## Compound 21

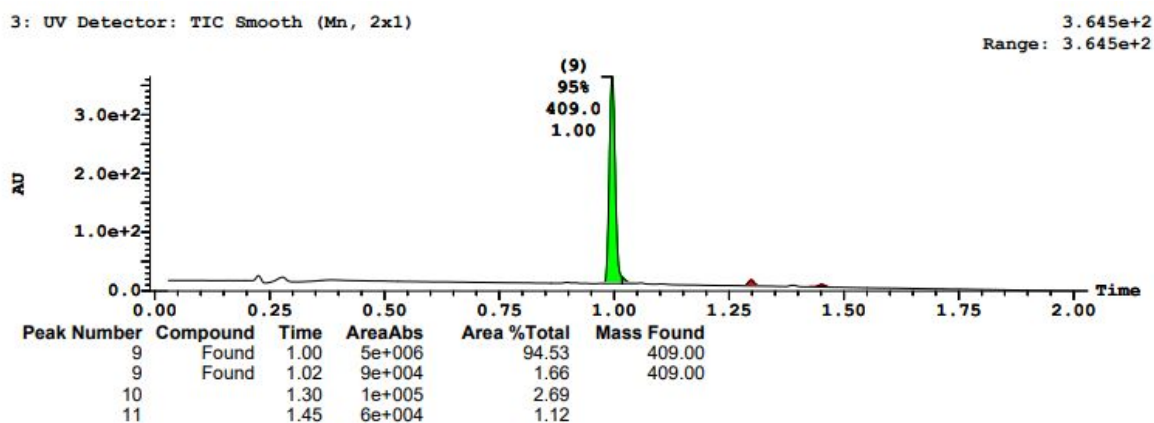

## Compound 22

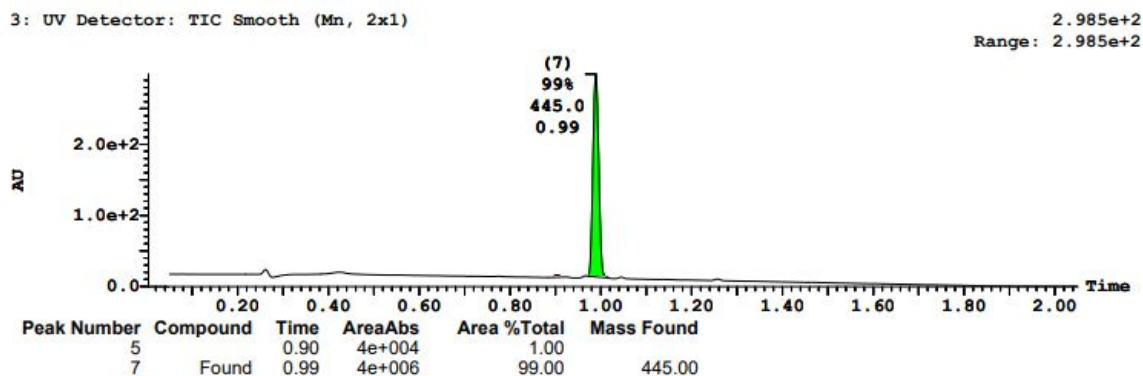

Compound 23

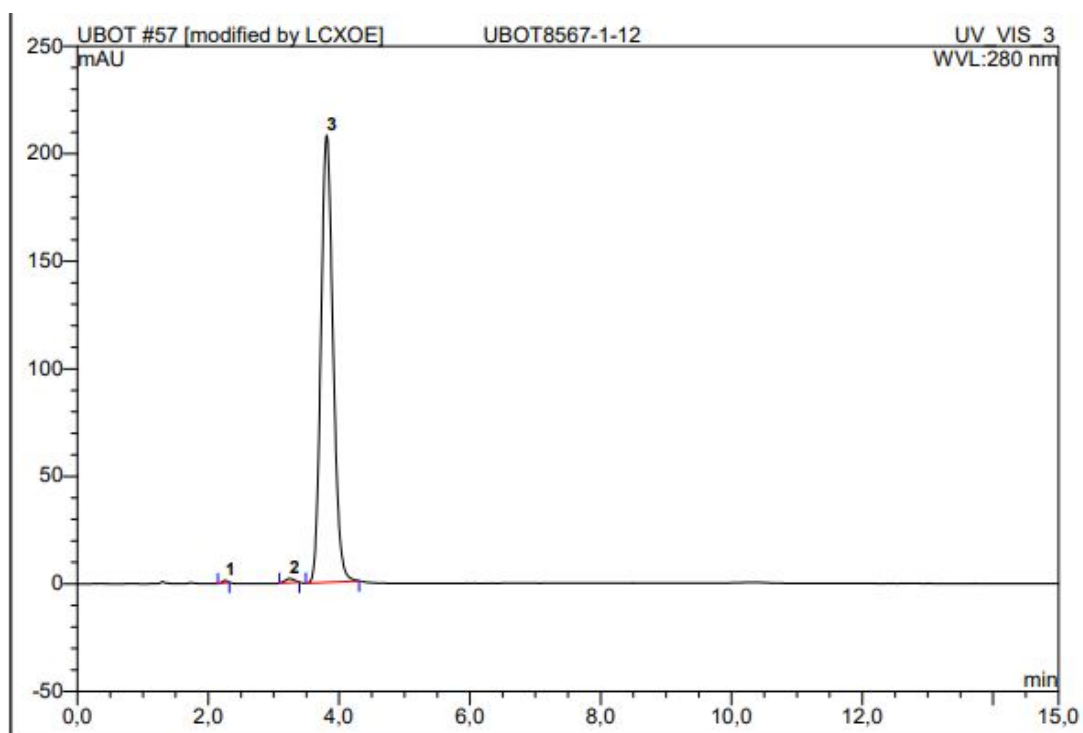

| No.           | Ret.Time<br>min | Peak Name | Height<br>mAU | Area<br>mAU*min | Rel.Area<br>% | Amount | Type |
|---------------|-----------------|-----------|---------------|-----------------|---------------|--------|------|
| 1             | 2,26            | n.a.      | 1,085         | 0,098           | 0,22          | n.a.   | BMB* |
| 2             | 3,24            | n.a.      | 1,890         | 0,308           | 0,68          | n.a.   | BMB* |
| 3             | 3,81            | n.a.      | 207,920       | 44,604          | 99,10         | n.a.   | BMB* |
| <b>Total:</b> |                 |           | 210,895       | 45,010          | 100,00        | 0,000  |      |

## Compound 24

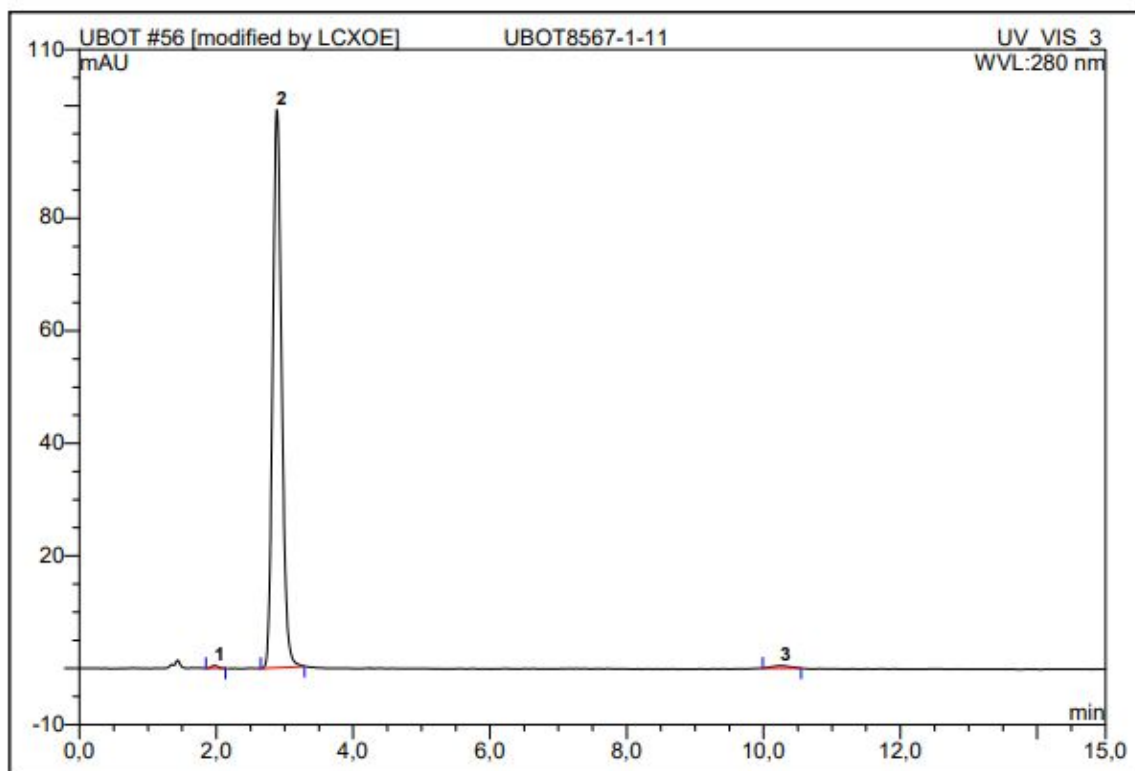

| No.           | Ret.Time min | Peak Name | Height mAU | Area mAU*min | Rel.Area % | Amount | Type |
|---------------|--------------|-----------|------------|--------------|------------|--------|------|
| 1             | 1,98         | n.a.      | 0,461      | 0,051        | 0,33       | n.a.   | BMB* |
| 2             | 2,88         | n.a.      | 99,132     | 15,052       | 98,80      | n.a.   | BMB* |
| 3             | 10,25        | n.a.      | 0,437      | 0,132        | 0,86       | n.a.   | BMB* |
| <b>Total:</b> |              |           | 100,030    | 15,234       | 100,00     | 0,000  |      |

## Compound 25

3: UV Detector: TIC Smooth (Mn, 2x1)

1.943e+2  
Range: 1.943e+2

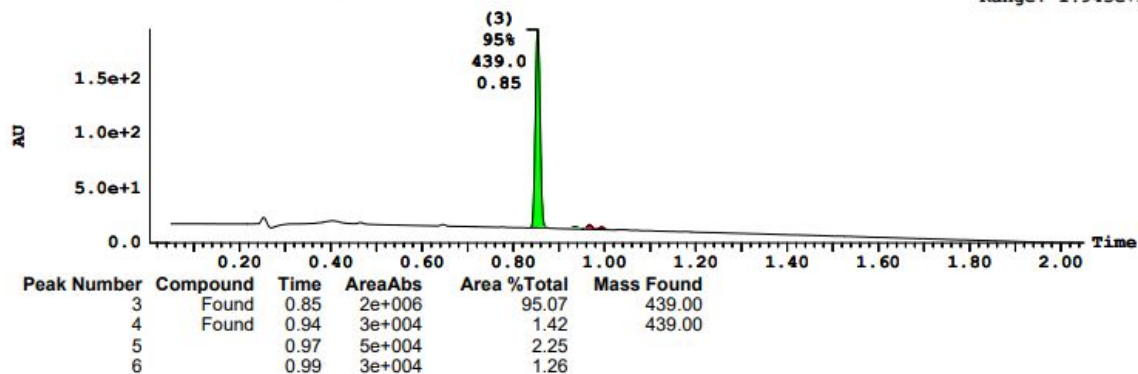



## Compound 26

3: UV Detector: TIC Smooth (Mn, 2x1)

2.741e+2  
Range: 2.741e+2

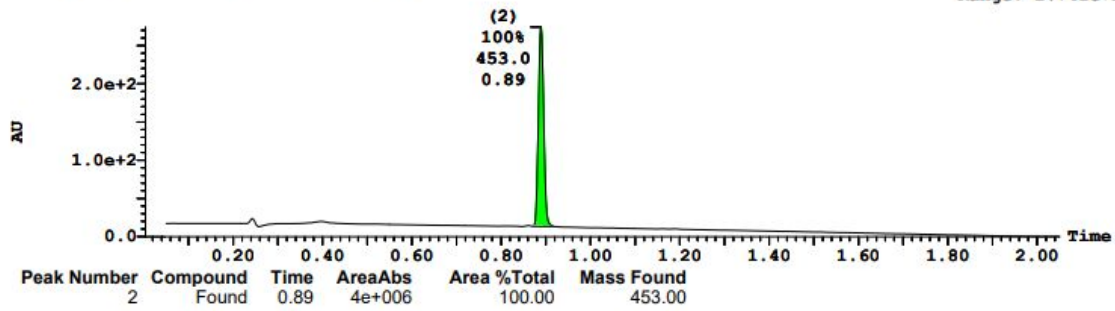

## Compound 27

3: UV Detector: TIC Smooth (Mn, 2x1)

2.602e+2  
Range: 2.602e+2

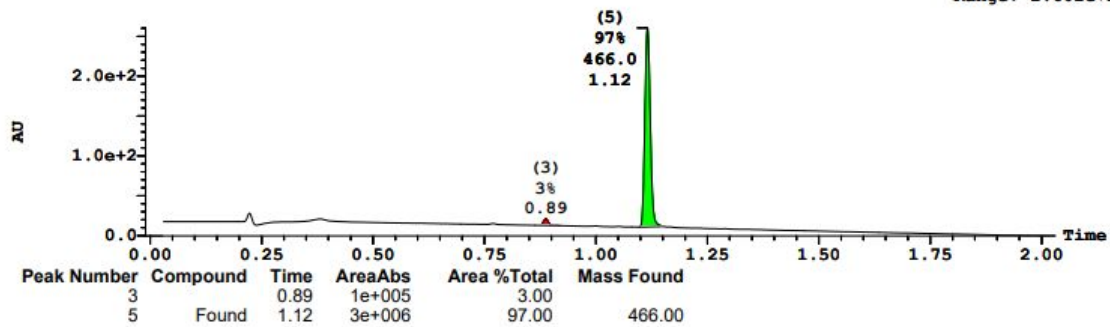

## Compound 28

3: UV Detector: TIC Smooth (Mn, 2x1)

1.838e+2  
Range: 1.838e+2

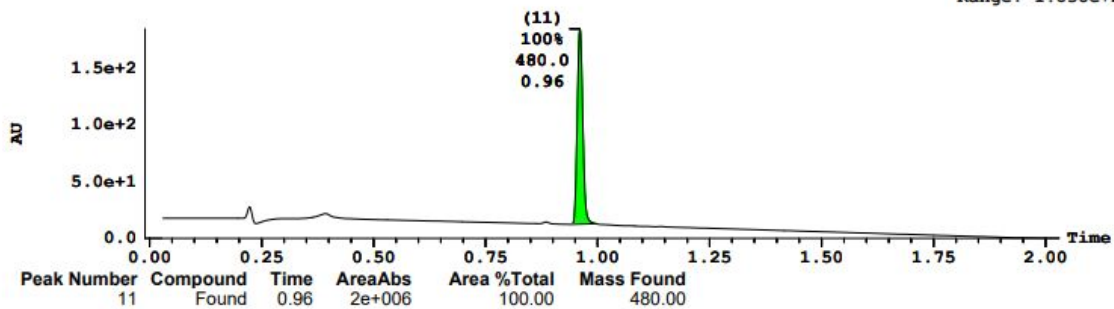

## Compound 29

3: UV Detector: TIC Smooth (Mn, 2x1)

3.772e+2  
Range: 3.772e+2

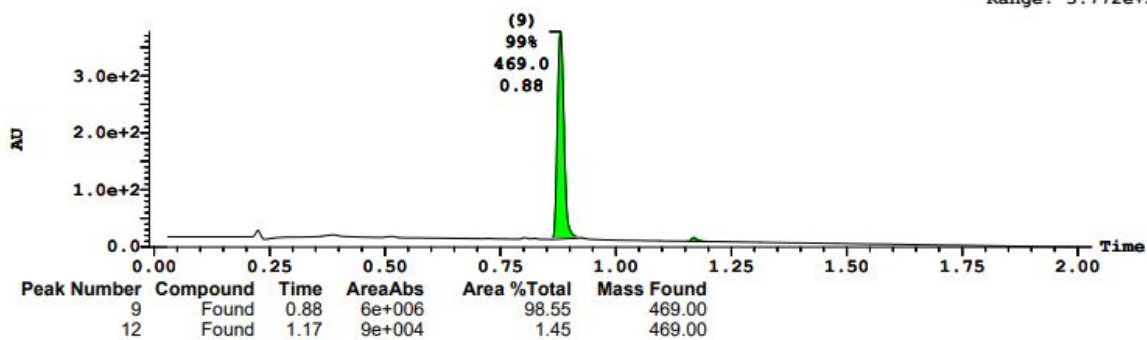

## Compound 30

3: UV Detector: TIC Smooth (Mn, 2x1)

1.207e+2  
Range: 1.207e+2

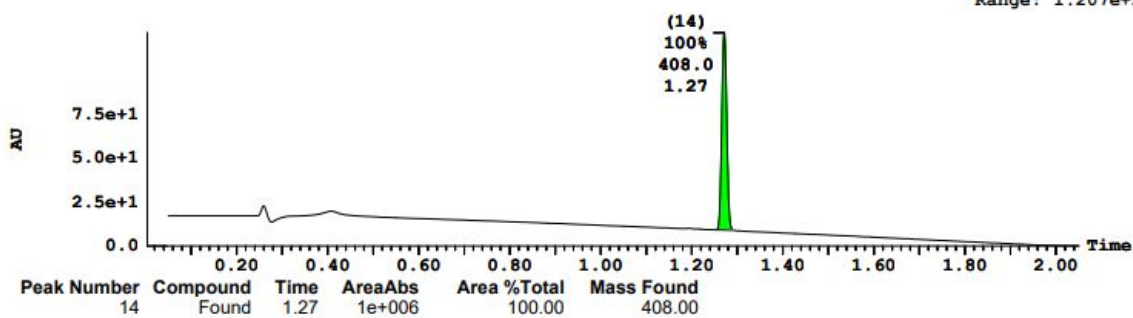

## Compound 31

3: UV Detector: TIC Smooth (Mn, 2x1)

2.873e+2  
Range: 2.873e+2

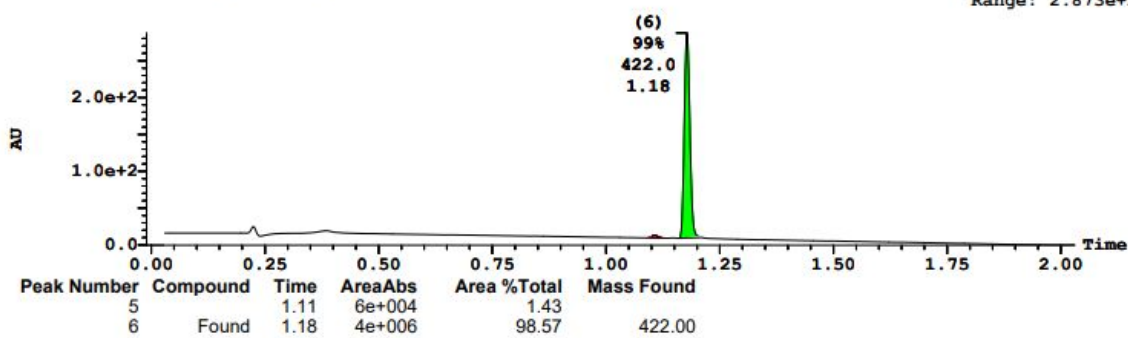

## Compound 32

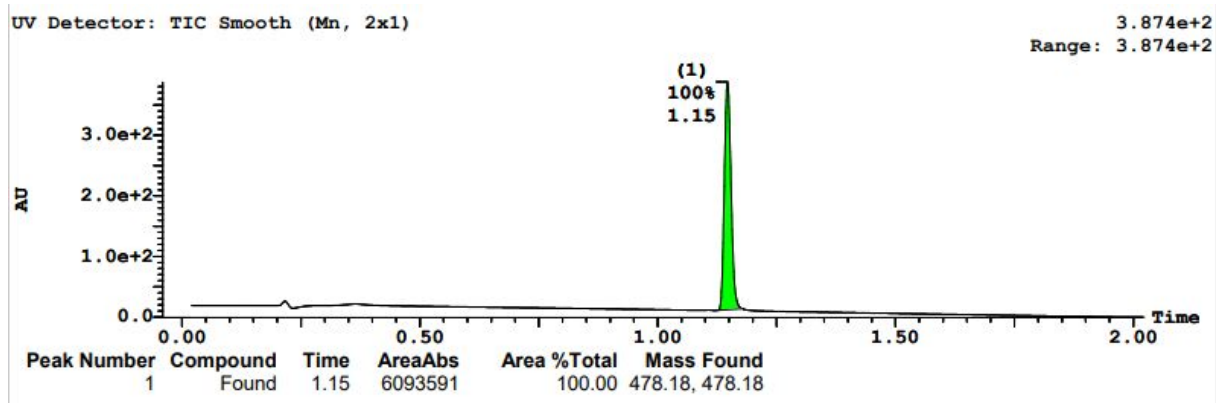

## Compound 33

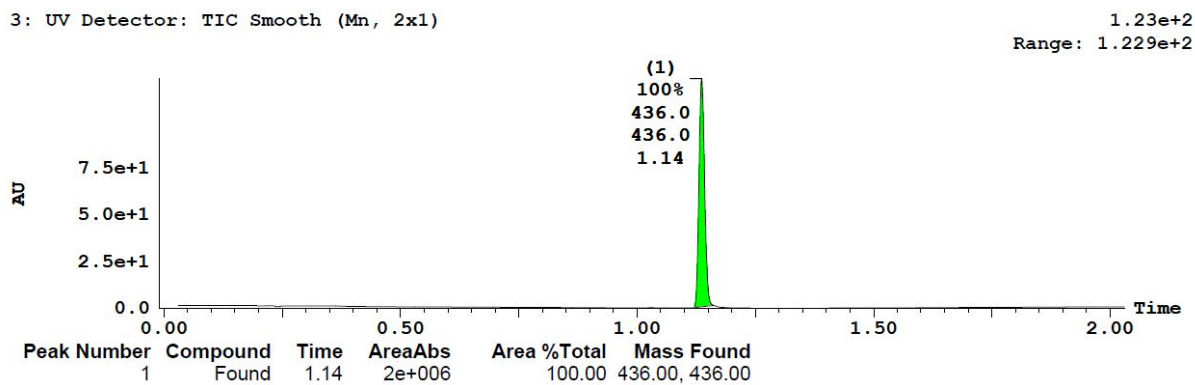

## Compound 34

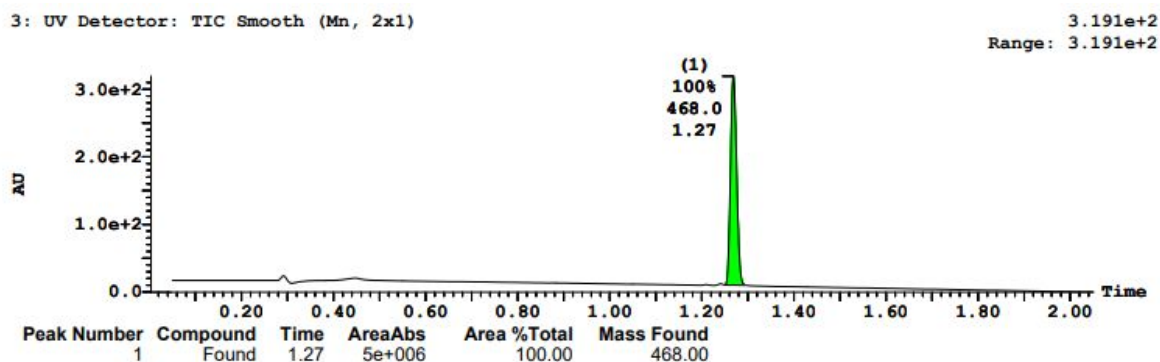

## Compound 35

UV Detector: TIC Smooth (Mn, 2x1)

3.989e+2  
Range: 3.996e+2

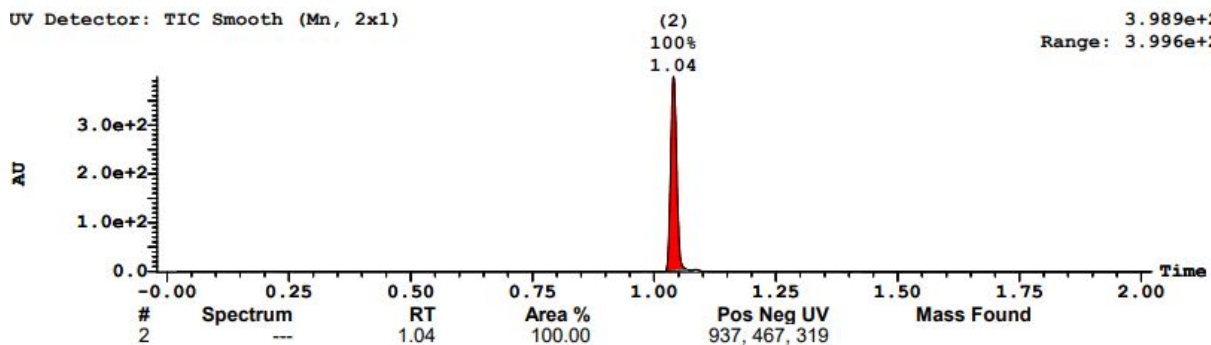

Peak ID Compound Time Mass Found  
2 1.05

SAMPLE: 1:24 Combine (200:208)

1:MS ES+  
1.4e+007

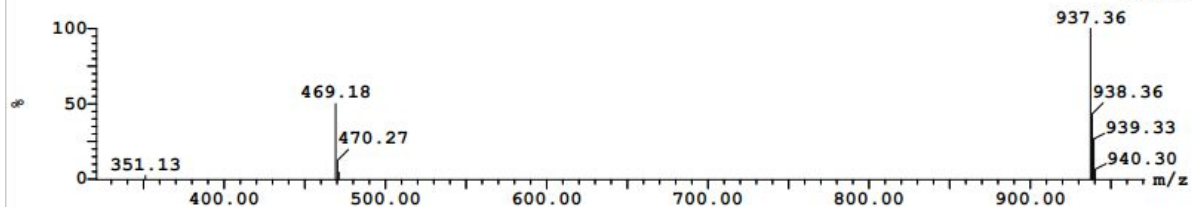

## Compound 36

3: UV Detector: TIC Smooth (Mn, 2x1)

4.518e+2  
Range: 4.524e+2

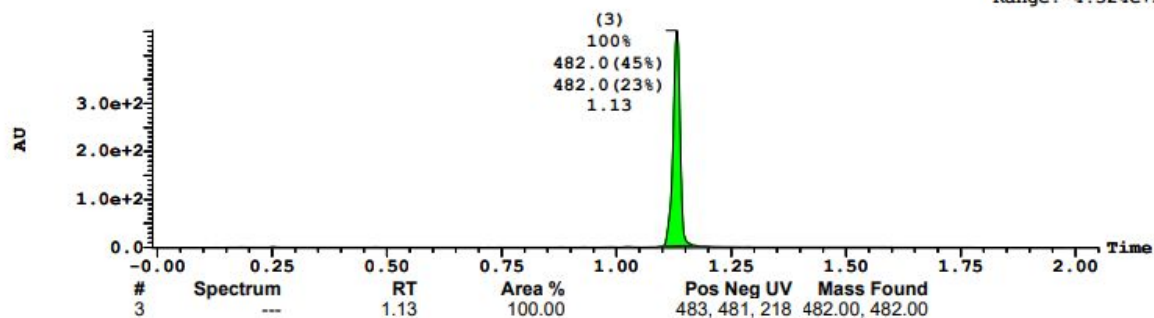

(3)  
100%  
482.0 (45%)  
482.0 (23%)  
1.13

## Compound 37

Sample analyzed by NMR only:

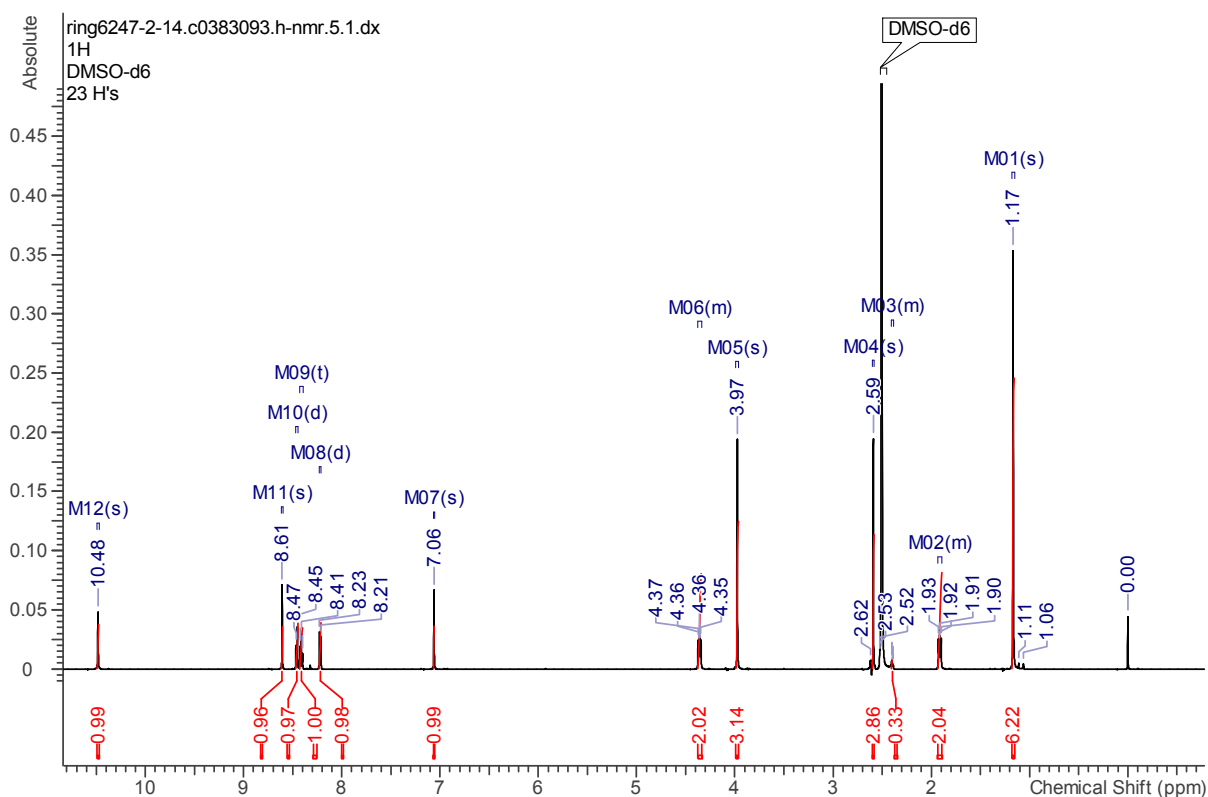

$^1\text{H}$  NMR (DMSO- $d_6$ , 600 MHz)  $\delta$  10.48 (s, 1H), 8.61 (s, 1H), 8.46 (d, 1H,  $J=7.6$  Hz), 8.41 (t, 1H,  $J=7.6$  Hz), 8.22 (d, 1H,  $J=7.6$  Hz), 7.06 (s, 1H), 4.3-4.4 (m, 2H), 3.97 (s, 3H), 2.59 (s, 3H), 2.4-2.4 (m, 1H), 1.9-1.9 (m, 2H), 1.17 (s, 6H).

## Compound 38

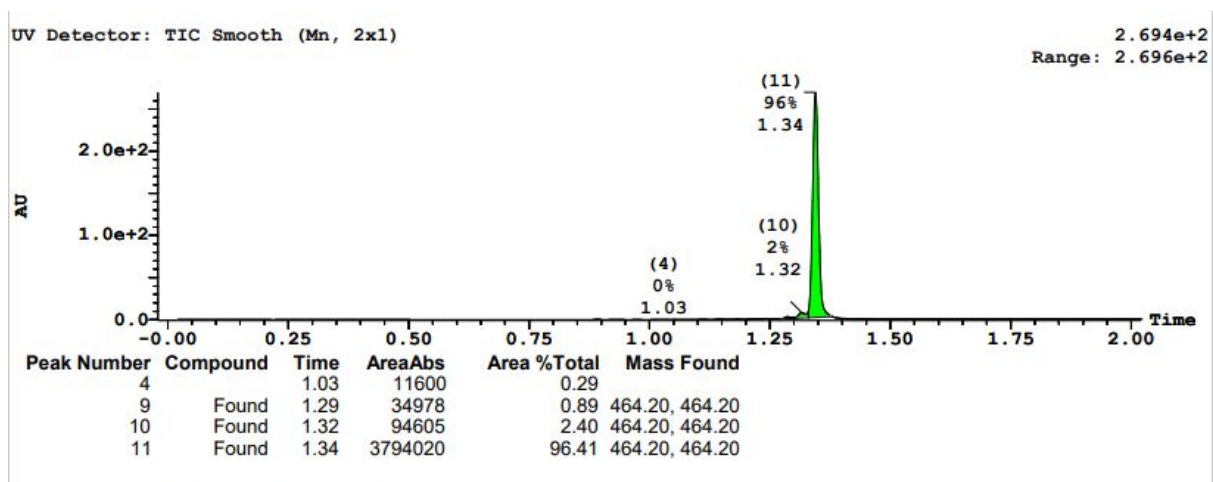

### Compound 39

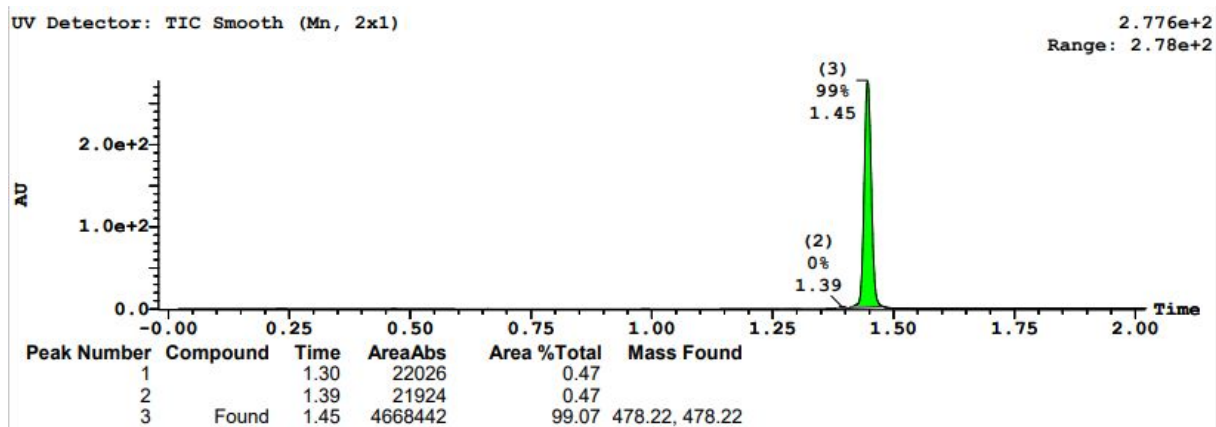

### Compound 40

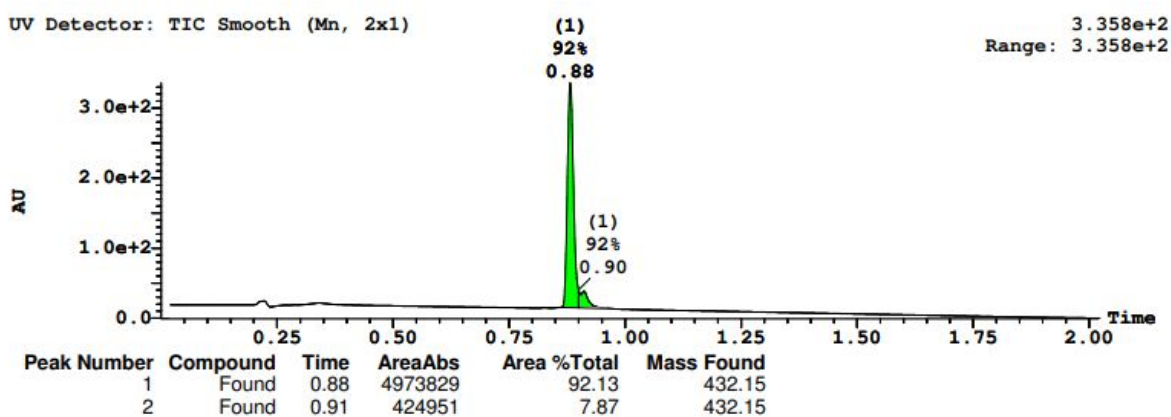

### Compound 41

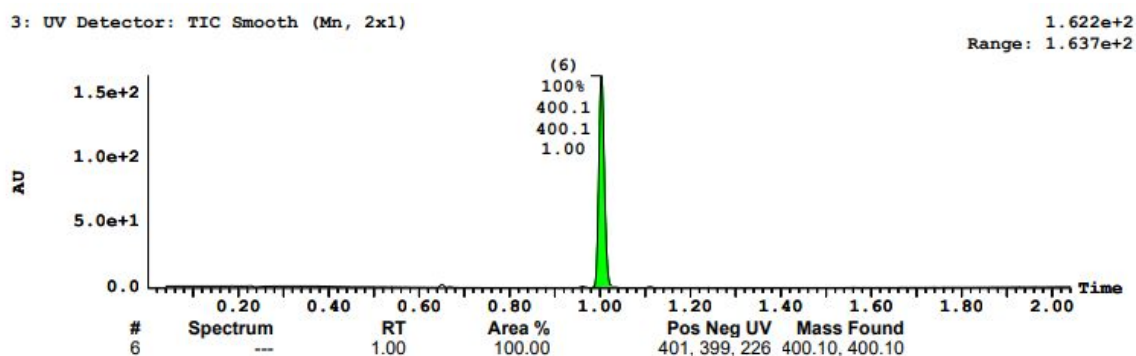

Experimental section: physicochemical assays

### **Aqueous Solubility of Compound from DMSO solutions**

Aqueous solubility at pH 6.5 was determined using an orientating HTS method.<sup>13</sup> Test compounds were applied as 1 mM DMSO solutions. After the addition of a buffer, pH 6.5, solutions were shaken for 24 h at rt. Undissolved material was removed by filtration. The compound dissolved in the filtrate was quantified using HPLC-MS/MS.

### References

- (1) Fabian, M. A.; Biggs, W. H., 3rd; Treiber, D. K.; Atteridge, C. E.; Azimioara, M. D.; Benedetti, M. G.; Carter, T. A.; Ciceri, P.; Edeen, P. T.; Floyd, M.; et al. A small molecule-kinase interaction map for clinical kinase inhibitors. *Nat Biotechnol* **2005**, *23*, 329-336.
- (2) Kabsch, W. Integration, scaling, space-group assignment and post-refinement. *Acta Crystallographica Section D* **2010**, *66*, 133-144.
- (3) Vagin, A.; Teplyakov, A. Molecular replacement with MOLREP. *Acta Crystallogr D Biol Crystallogr* **2010**, *66*, 22-25.
- (4) Murshudov, G. N.; Skubak, P.; Lebedev, A. A.; Pannu, N. S.; Steiner, R. A.; Nicholls, R. A.; Winn, M. D.; Long, F.; Vagin, A. A. REFMAC5 for the refinement of macromolecular crystal structures. *Acta Crystallographica Section D* **2011**, *67*, 355-367.
- (5) Emsley, P.; Lohkamp, B.; Scott, W. G.; Cowtan, K. Features and development of Coot. *Acta Crystallogr D Biol Crystallogr* **2010**, *66*, 486-501.
- (6) Schüttelkopf, A. W.; van Aalten, D. M. PRODRG: a tool for high-throughput crystallography of protein-ligand complexes. *Acta Crystallogr D Biol Crystallogr* **2004**, *60*, 1355-1363.
- (7) Friesner, R. A.; Banks, J. L.; Murphy, R. B.; Halgren, T. A.; Klicic, J. J.; Mainz, D. T.; Repasky, M. P.; Knoll, E. H.; Shelley, M.; Perry, J. K.; et al. Glide: a new approach for rapid, accurate docking and scoring. 1. Method and assessment of docking accuracy. *J Med Chem* **2004**, *47*, 1739-1749.
- (8) Halgren, T. A.; Murphy, R. B.; Friesner, R. A.; Beard, H. S.; Frye, L. L.; Pollard, W. T.; Banks, J. L. Glide: a new approach for rapid, accurate docking and scoring. 2. Enrichment factors in database screening. *J Med Chem* **2004**, *47*, 1750-1759.
- (9) Jones, G.; Willett, P.; Glen, R. C.; Leach, A. R.; Taylor, R. Development and validation of a genetic algorithm for flexible docking. *J Mol Biol* **1997**, *267*, 727-748.
- (10) *BIOVIA Pipeline Pilot*; Dassault Systèmes: San Diego.
- (11) Gasteiger, J.; Rudolph, C.; Sadowski, J. Automatic generation of 3D-atomic coordinates for organic molecules. *Tetrahedron Computer Methodology* **1990**, *3*, 537-547.
- (12) *ADMET Predictor*, Simulations Plus, Inc: Lancaster, CA, 2017.
- (13) Onofrey, T.; Kazan, G. Performance and Correlation of a 96-Well High Throughput Screening Method to Determine Aqueous Drug Solubility. In *MultiScreen® Solubility Filter Plate protocol note.*, Millipore Corporation: Billerica, MA USA, 2003.
